# Supplementary material for: Non-pericyclic cycloaddition of gem-difluorosubstituted azomethine ylides to the CO bond: computational study and synthesis of fluorinated oxazole derivatives
Source: Royal Society of Chemistry journal article supplement (doi:10.1039/c7ob00521k), 2017-01-01
Supplement: c7ob00521k1.pdf [file c7ob00521k1.pdf]

## Electronic Supplementary Information

# Non-pericyclic Cycloaddition of *gem*-Difluorosubstituted Azomethine Ylides to the C=O Bond: Computational Study and Synthesis of Fluorinated Oxazole Derivatives

Karina R. Gaisina, Alexander F. Khlebnikov,\* Mikhail S. Novikov,

Saint Petersburg State University, Institute of Chemistry, 7/9 Universitetskaya nab., St. Petersburg, 199034 Russia

a.khlebnikov@spbu.ru

Table of content:

|                                                      |     |
|------------------------------------------------------|-----|
| Competition Experiments .....                        | S2  |
| <sup>1</sup> H and <sup>13</sup> C NMR spectra ..... | S3  |
| Figures S3-S5.....                                   | S29 |
| Computational details.....                           | S32 |

## Competition Experiments

Competition experiments for the reaction of aldehydes **3a-e** were performed as follows. A round bottom flask containing freshly prepared lead filings (0.3 mmol) and dry dichloromethane (5 mL) was charged with Bu<sub>4</sub>NBr (0.6 mmol), *N*-benzhydrylidene-*N*-methylamine **11** (0.15-0.25 mmol), the competing pair of aldehydes (1-2.5 mmol in 1:1-2.5 mol ratio), CF<sub>2</sub>Br<sub>2</sub> (0.6 mmol), and 2-methylnaphthalene (the internal standard). The flask was tightly stoppered, immersed into the thermostat bath and the reaction mixture was vigorously stirred by magnetic stirrer at 40 °C. After the reaction started, as evidenced by clouding of the solution, small samples were periodically removed for <sup>1</sup>H NMR analysis. While the aldehydes **3a-e** covered a wide range of  $\sigma$  values, to guarantee no aldehyde would react exclusively in the competition experiments, pairs of aldehydes were selected that were close in reactivity (Table 1). Relative constants were calculated using  $k_1/k_2 = [H_1] \cdot [A_2]/[H_2] \cdot [A_1]$  for experiments where the conversion of the starting aldehydes was less than 10%. The [H<sub>i</sub>] data were obtained via integration of the 5-H singlet of the product, and [A<sub>i</sub>] data were obtained via integration of the aldehyde proton before the reaction started.

**Table 1.** Pairs of competing aldehydes **3a-e** and relative rate data for the reaction with azomethine ylide **12**.

| Aldehyde<br>N1/N2 | n <sup>a</sup> | k <sub>1</sub> /k <sub>2</sub> | s <sup>b</sup> | s <sub>m</sub> <sup>c</sup> |
|-------------------|----------------|--------------------------------|----------------|-----------------------------|
| <b>3d/3c</b>      | 6              | 9.49                           | 1.24           | 0.51                        |
| <b>3e/3d</b>      | 11             | 3.39                           | 0.41           | 0.12                        |
| <b>3c/3a]</b>     | 5              | 0.235                          | 0.007          | 0.003                       |
| <b>3b/3a</b>      | 4              | 0.481                          | 0.058          | 0.029                       |

<sup>a</sup> Number of experiments. <sup>b</sup> Standard deviation. <sup>c</sup> Standard mean square error.

# NMR spectra

3-Methyl-2,2,5-triphenyloxazolidine-4-one (14a), 300(<sup>1</sup>H) MHz, CDCl<sub>3</sub>

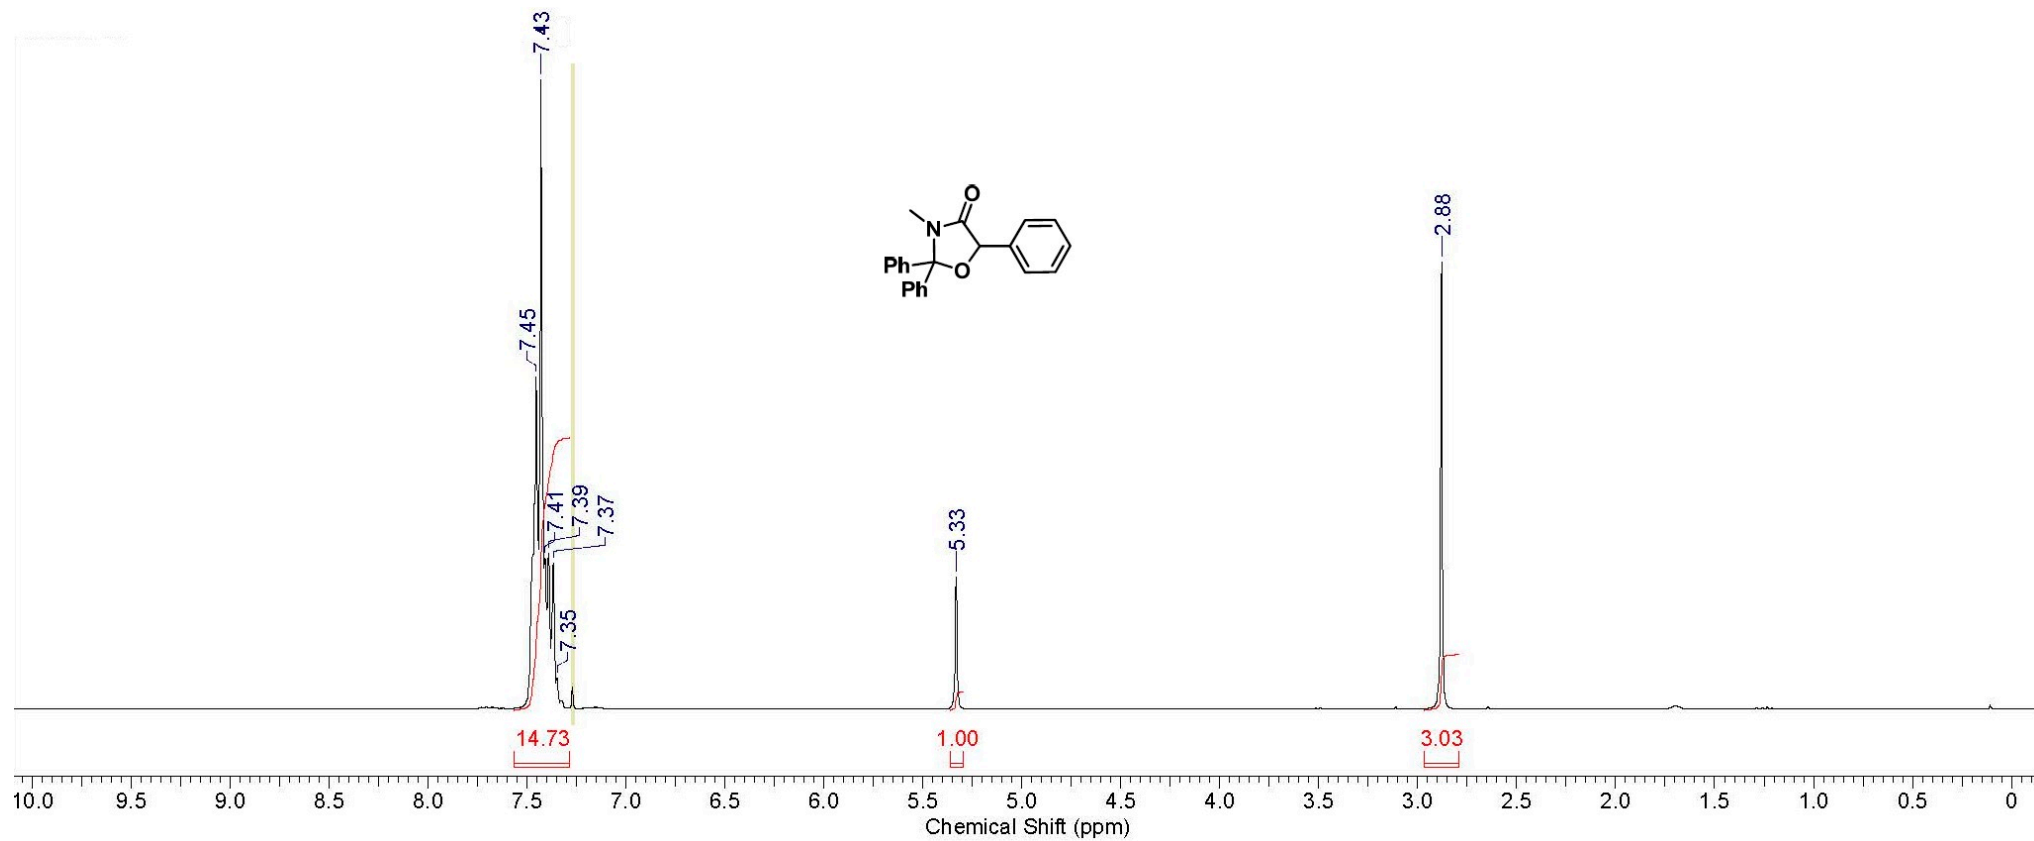

3-Methyl-2,2,5-triphenyloxazolidine-4-one (14a), 75(<sup>13</sup>C) MHz, CDCl<sub>3</sub>

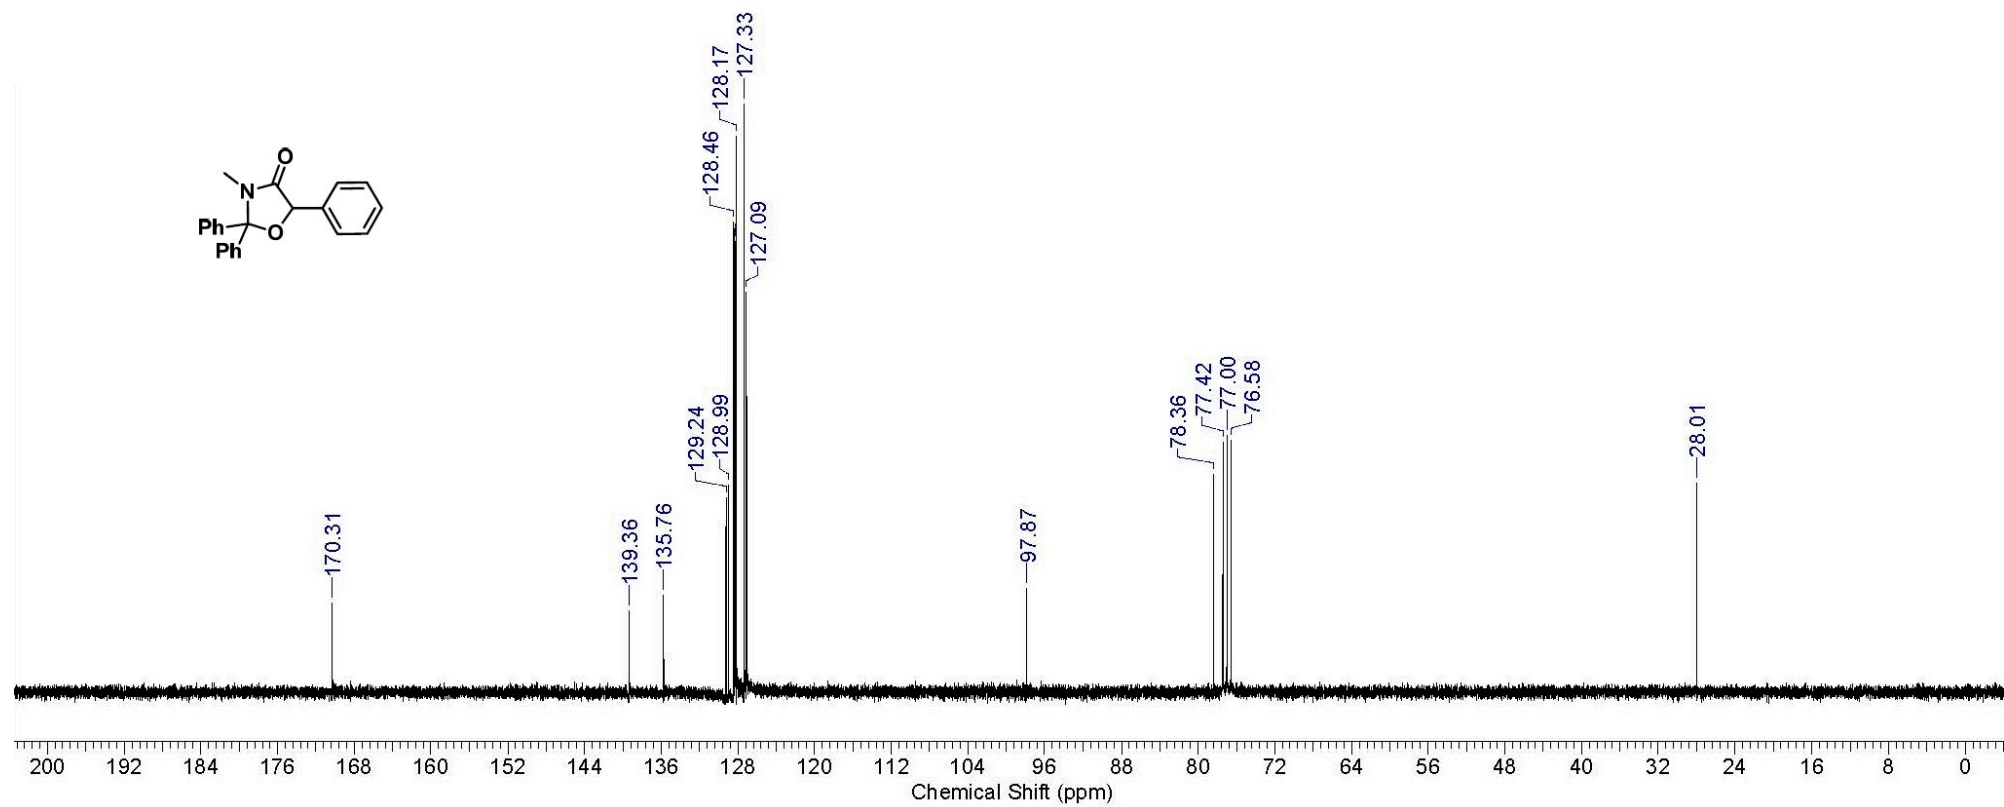

3-Methyl-2,2-diphenyl-5-(p-tolyl)oxazolidin-4-one (14b), 300(<sup>1</sup>H) MHz, CDCl<sub>3</sub>

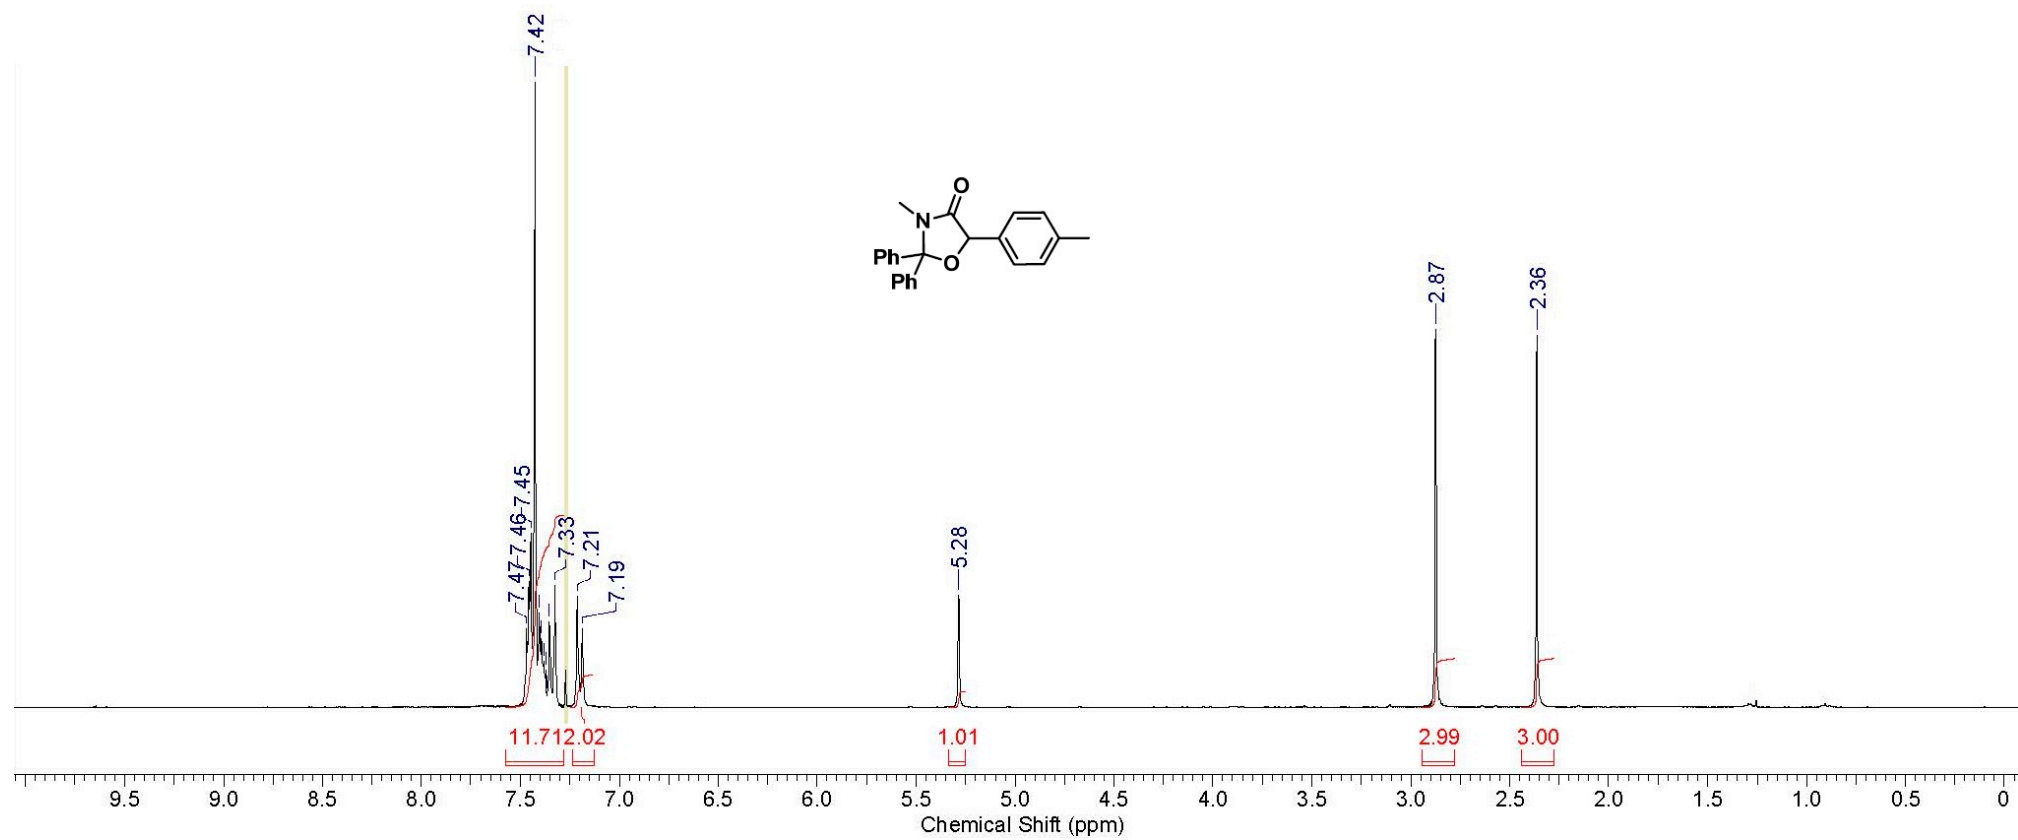

3-Methyl-2,2-diphenyl-5-(p-tolyl)oxazolidin-4-one (14b), 75(<sup>13</sup>C) MHz, CDCl<sub>3</sub>

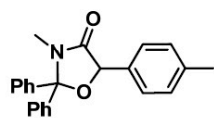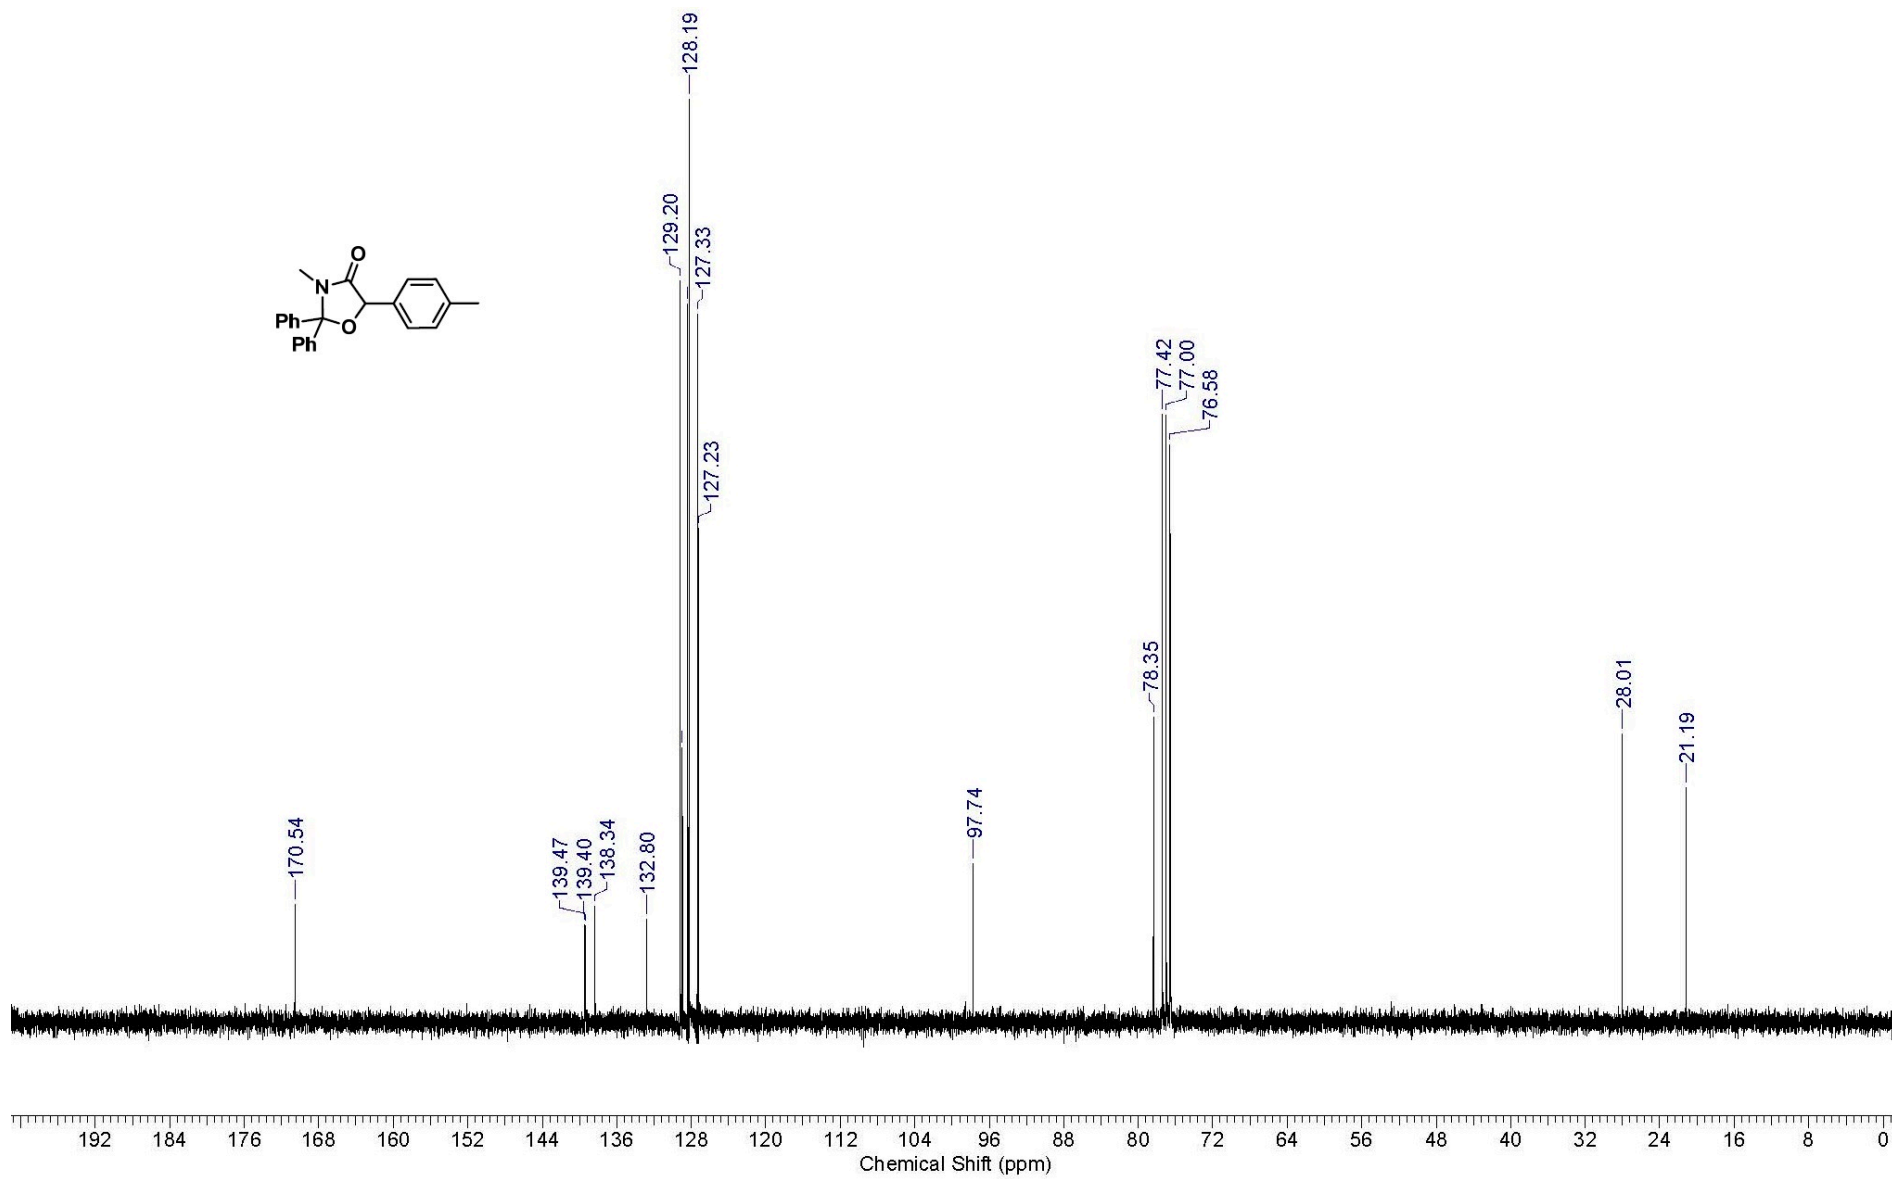

5-(4-Methoxyphenyl)-3-methyl-2,2-diphenyloxazolidin-4-one (14c), 300(<sup>1</sup>H) MHz, CDCl<sub>3</sub>

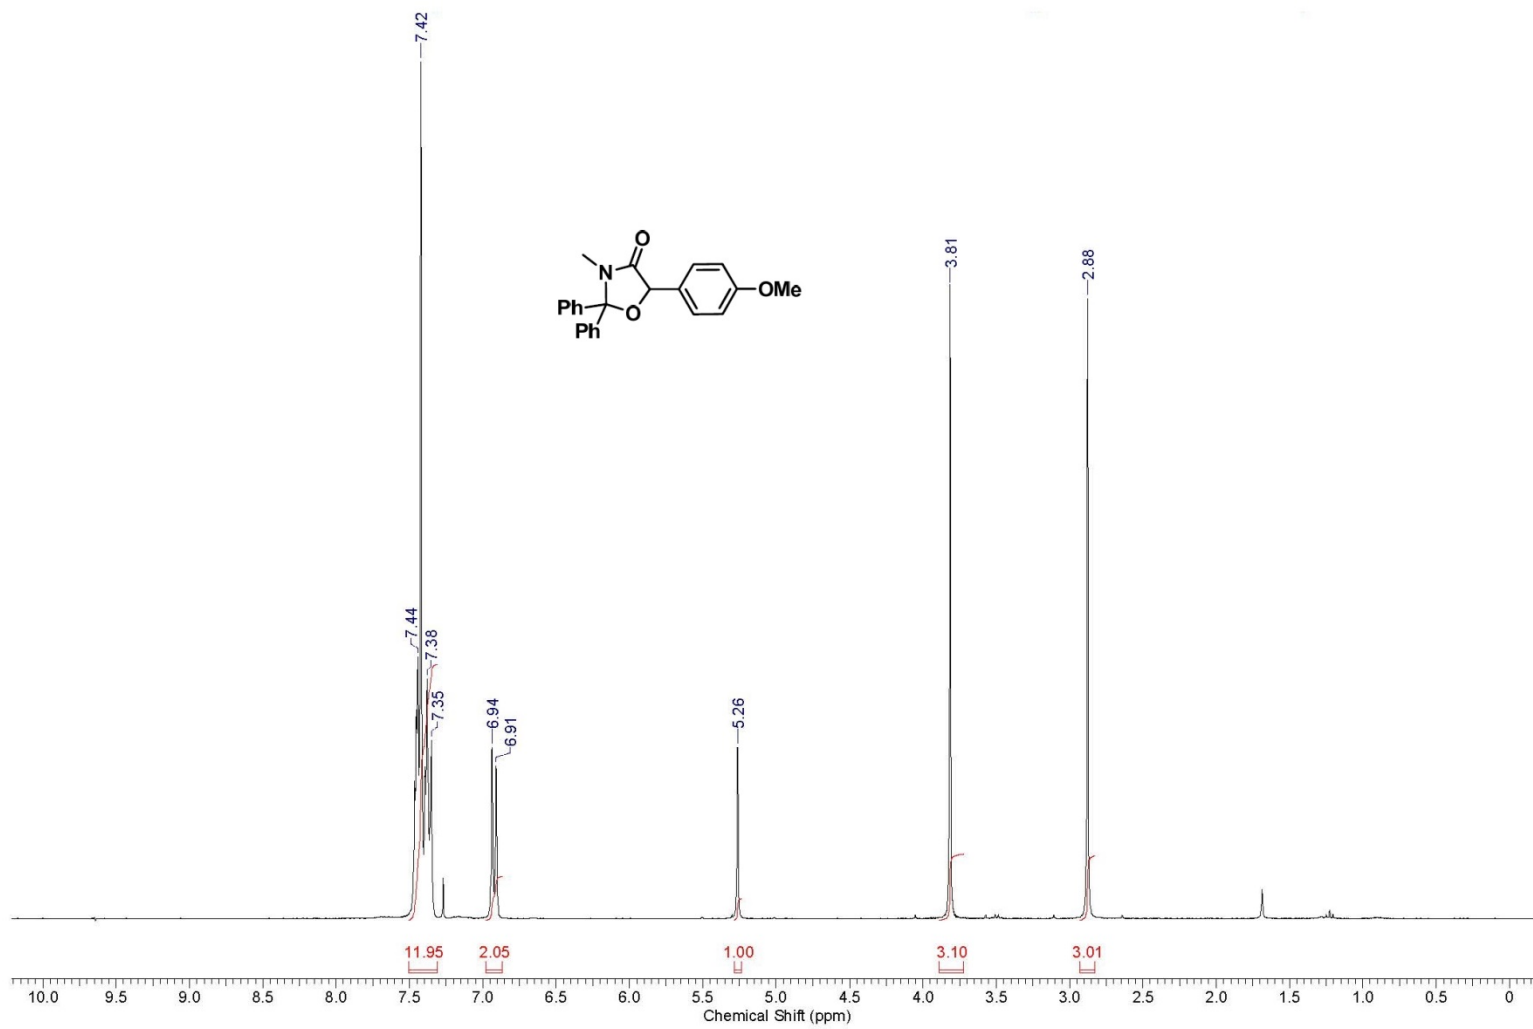

5-(4-Methoxyphenyl)-3-methyl-2,2-diphenyloxazolidin-4-one (14c), 75(<sup>13</sup>C) MHz, CDCl<sub>3</sub>

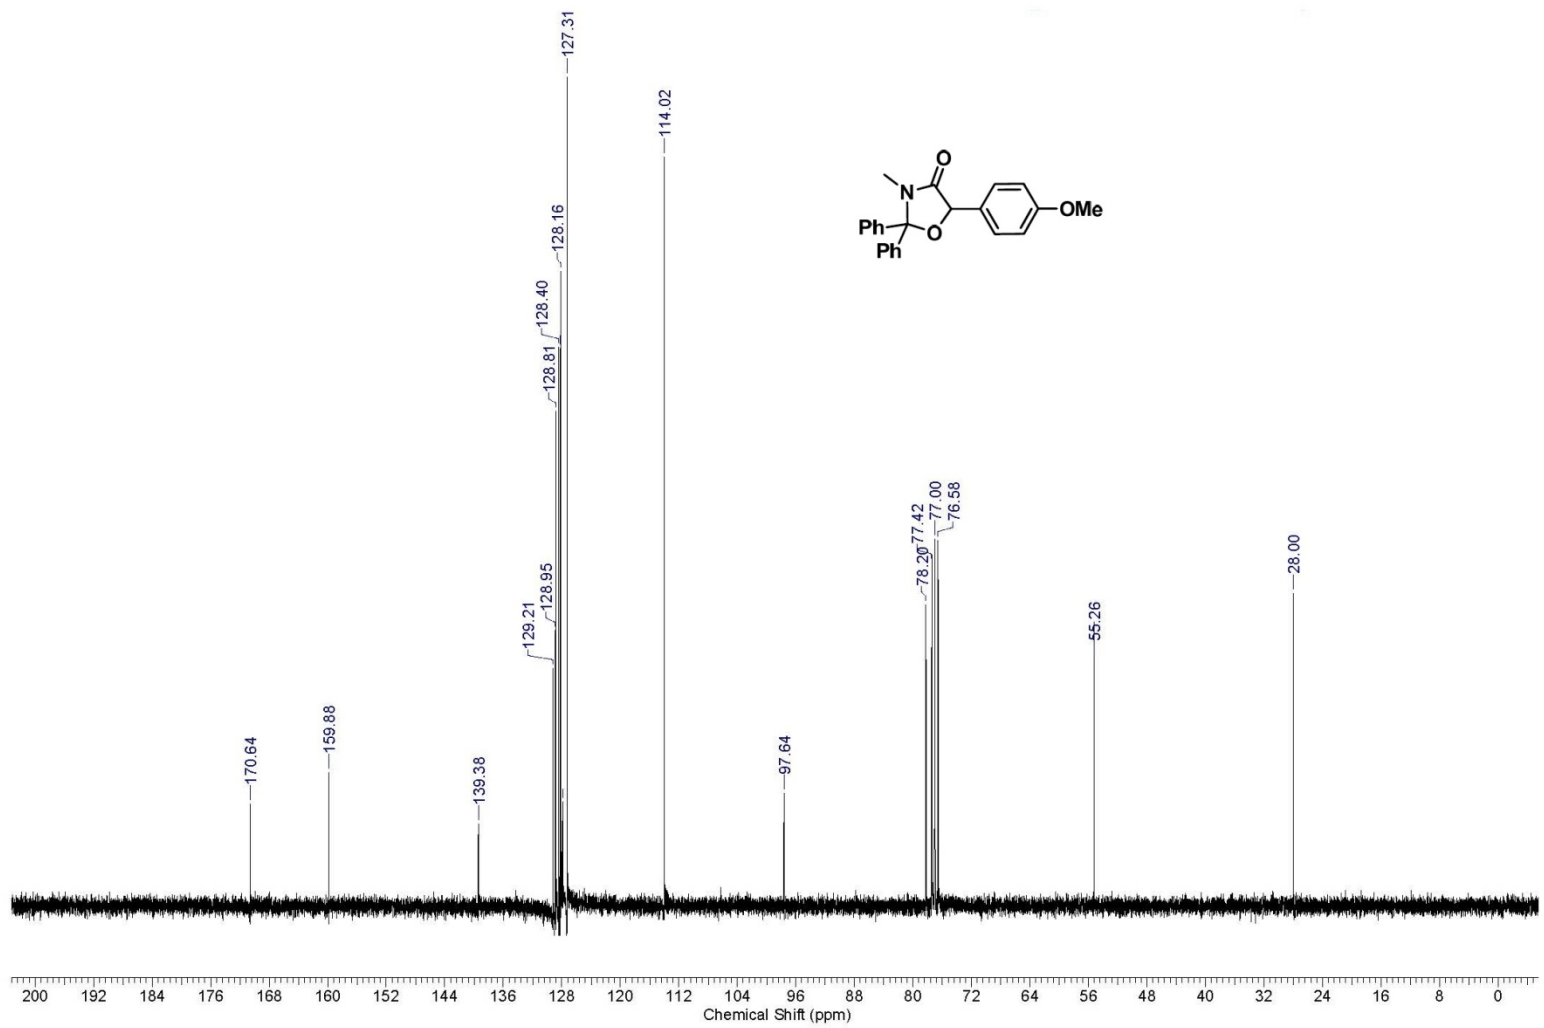



5-(4-Chlorophenyl)-3-methyl-2,2-diphenyloxazolidin-4-one (14d), 300(<sup>1</sup>H) MHz, CDCl<sub>3</sub>

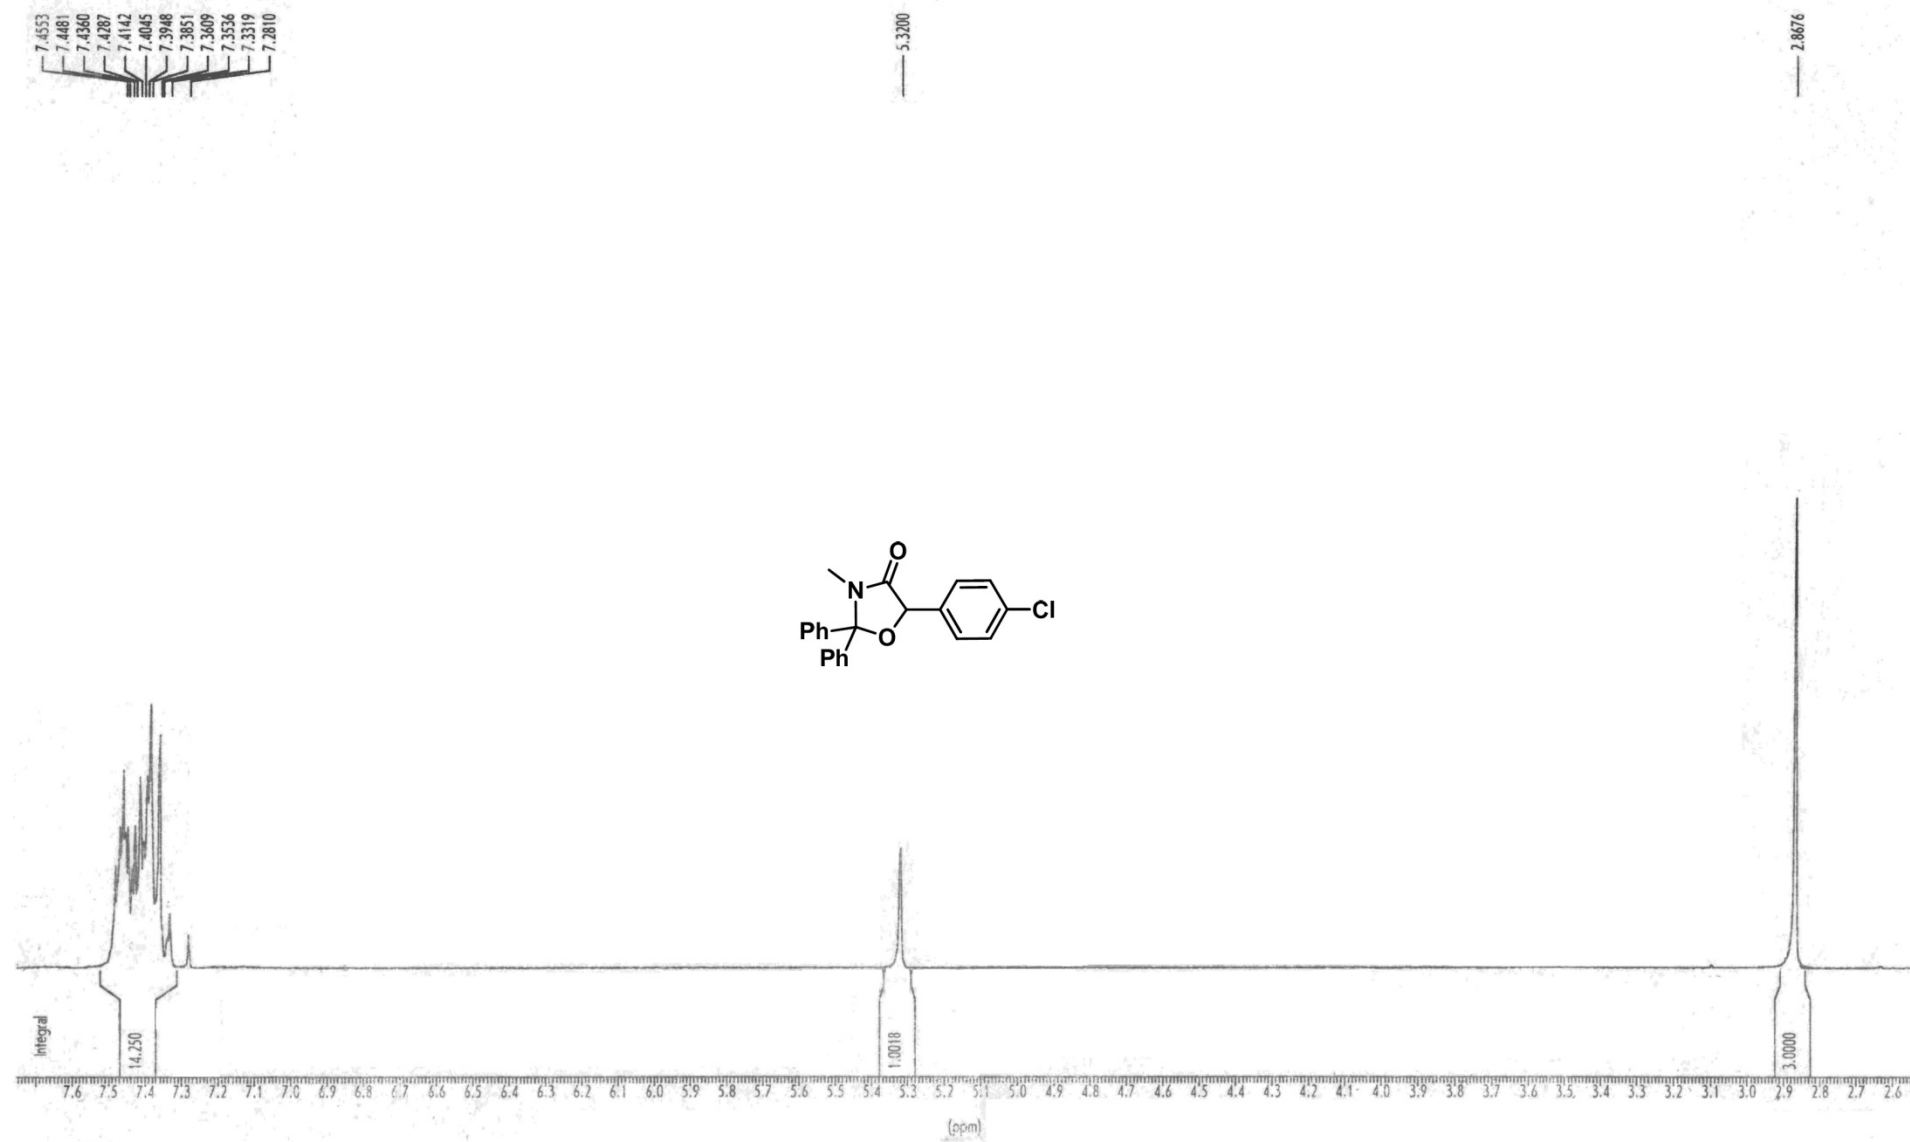

5-(4-Chlorophenyl)-3-methyl-2,2-diphenyloxazolidin-4-one (14d), 75(<sup>13</sup>C) MHz, CDCl<sub>3</sub>

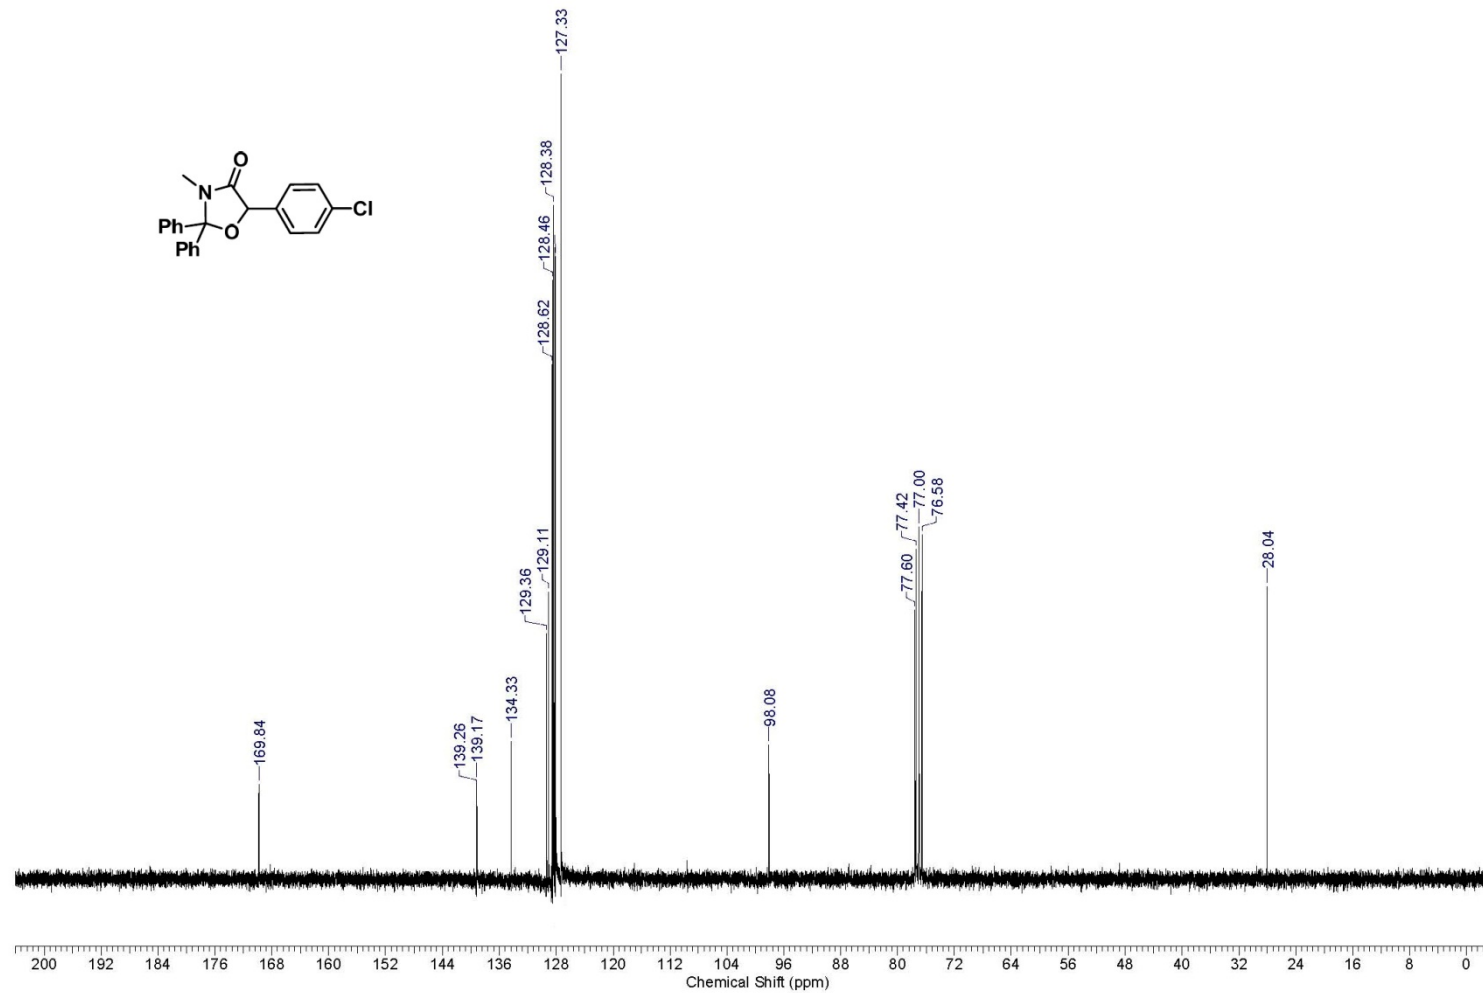

4-(3-Methyl-4-oxo-2,2-diphenyloxazolidin-5-yl)benzonitrile (14e), 300(<sup>1</sup>H) MHz, CDCl<sub>3</sub>

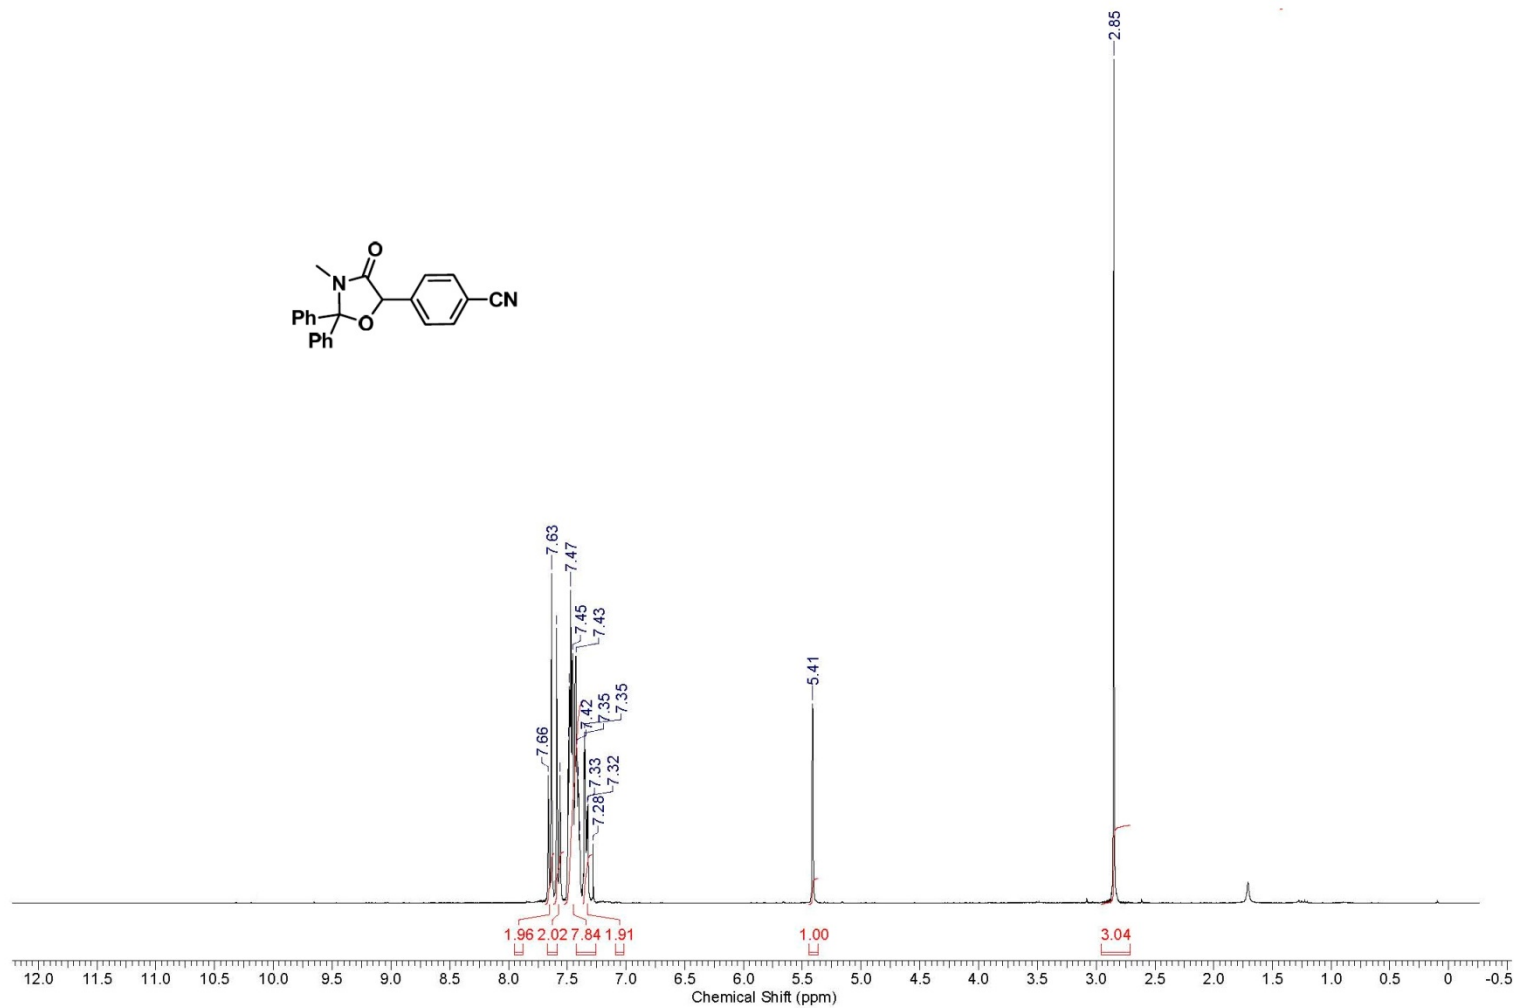

4-(3-Methyl-4-oxo-2,2-diphenyloxazolidin-5-yl)benzonitrile (14e), 75(<sup>13</sup>C) MHz, CDCl<sub>3</sub>

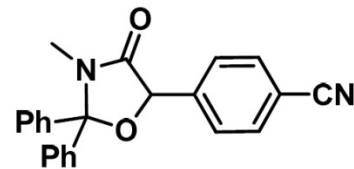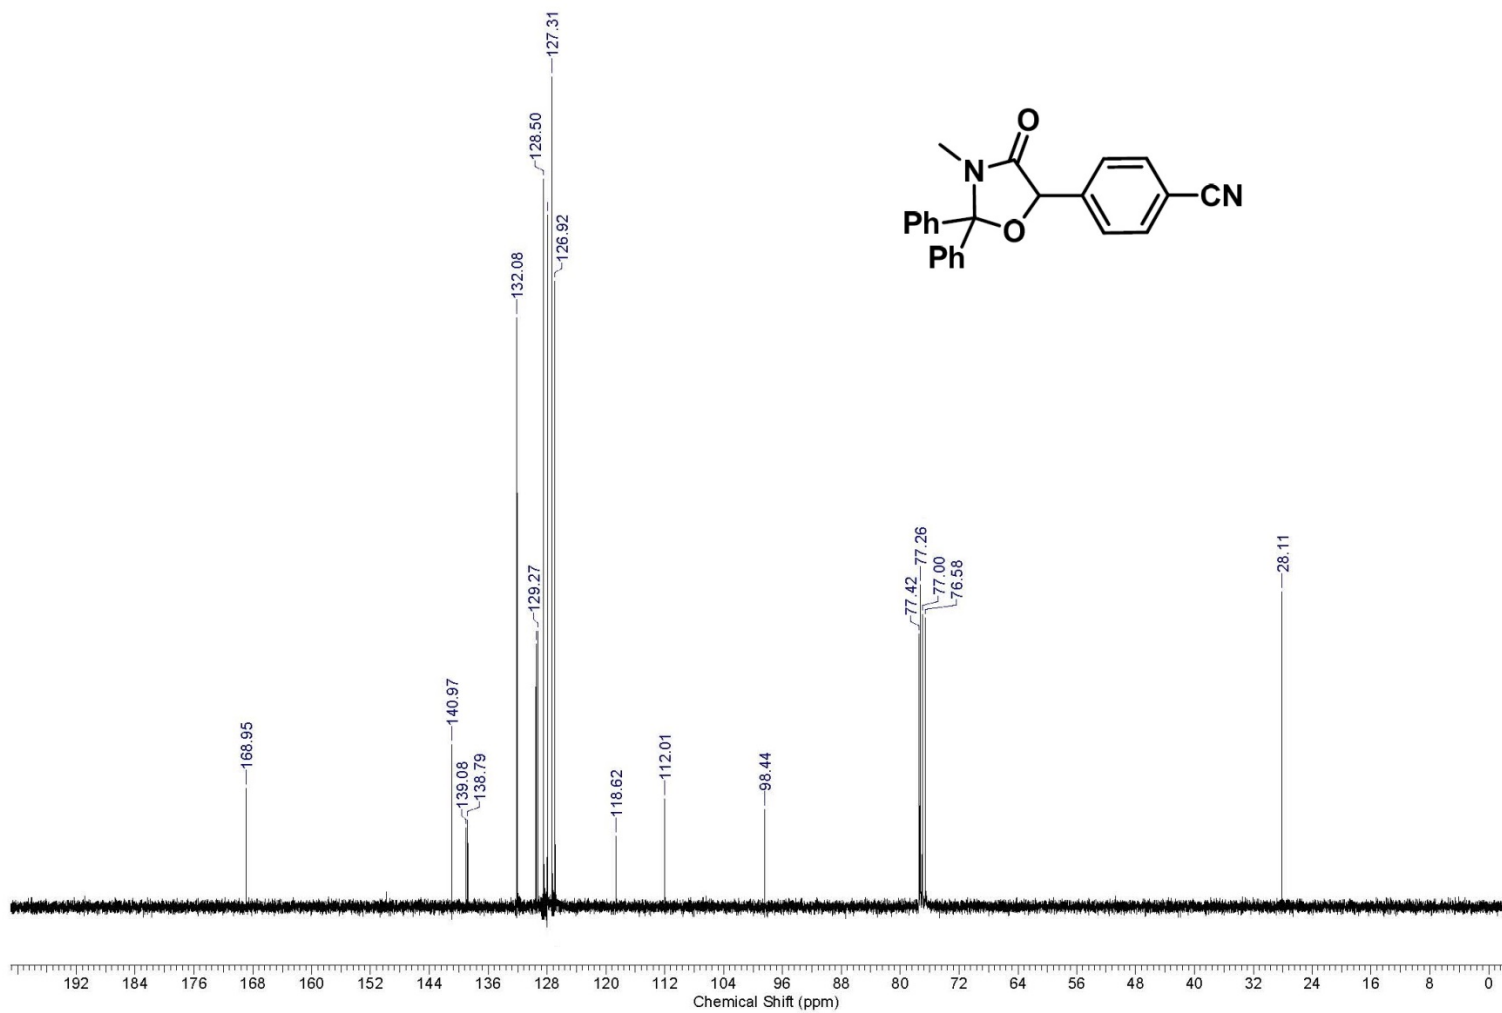

4,4-Difluoro-3-methyl-2,2,5-triphenyl-5-(trifluoromethyl)oxazolidine (28a), 300(<sup>1</sup>H) MHz, CDCl<sub>3</sub>

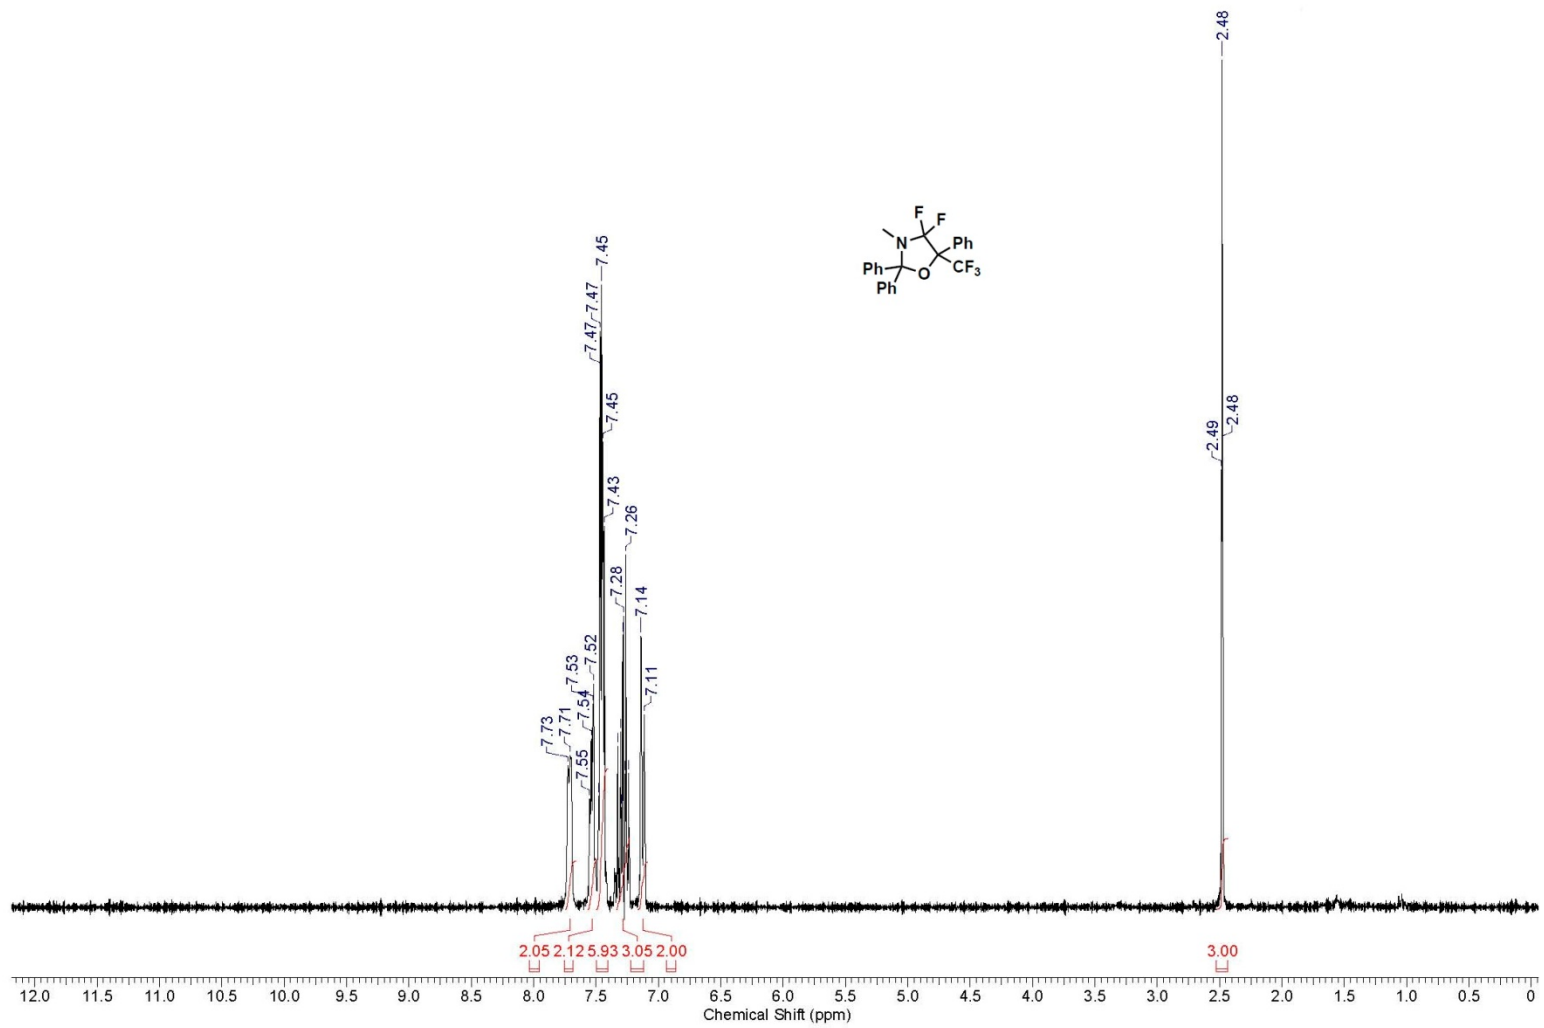

4,4-Difluoro-3-methyl-2,2,5-triphenyl-5-(trifluoromethyl)oxazolidine (28a), 75(<sup>13</sup>C) MHz, CDCl<sub>3</sub>

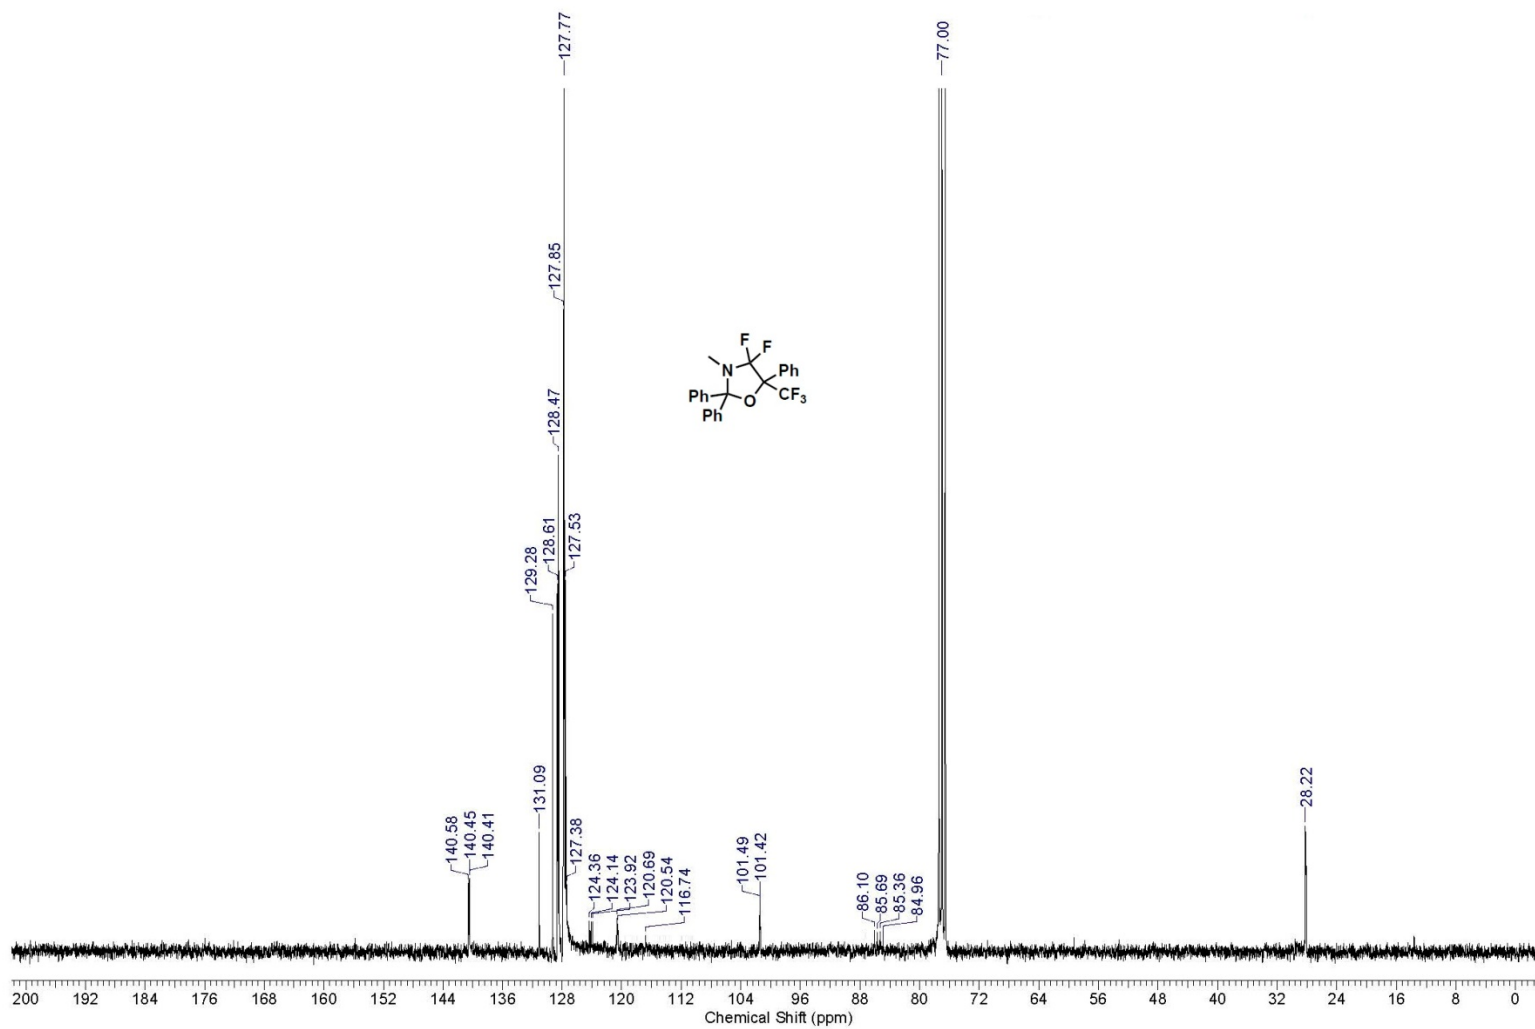

4,4-Difluoro-3-methyl-2,2-diphenyl-5-(p-tolyl)-5-(trifluoromethyl)oxazolidine (28b), 300(<sup>1</sup>H) MHz, CDCl<sub>3</sub>

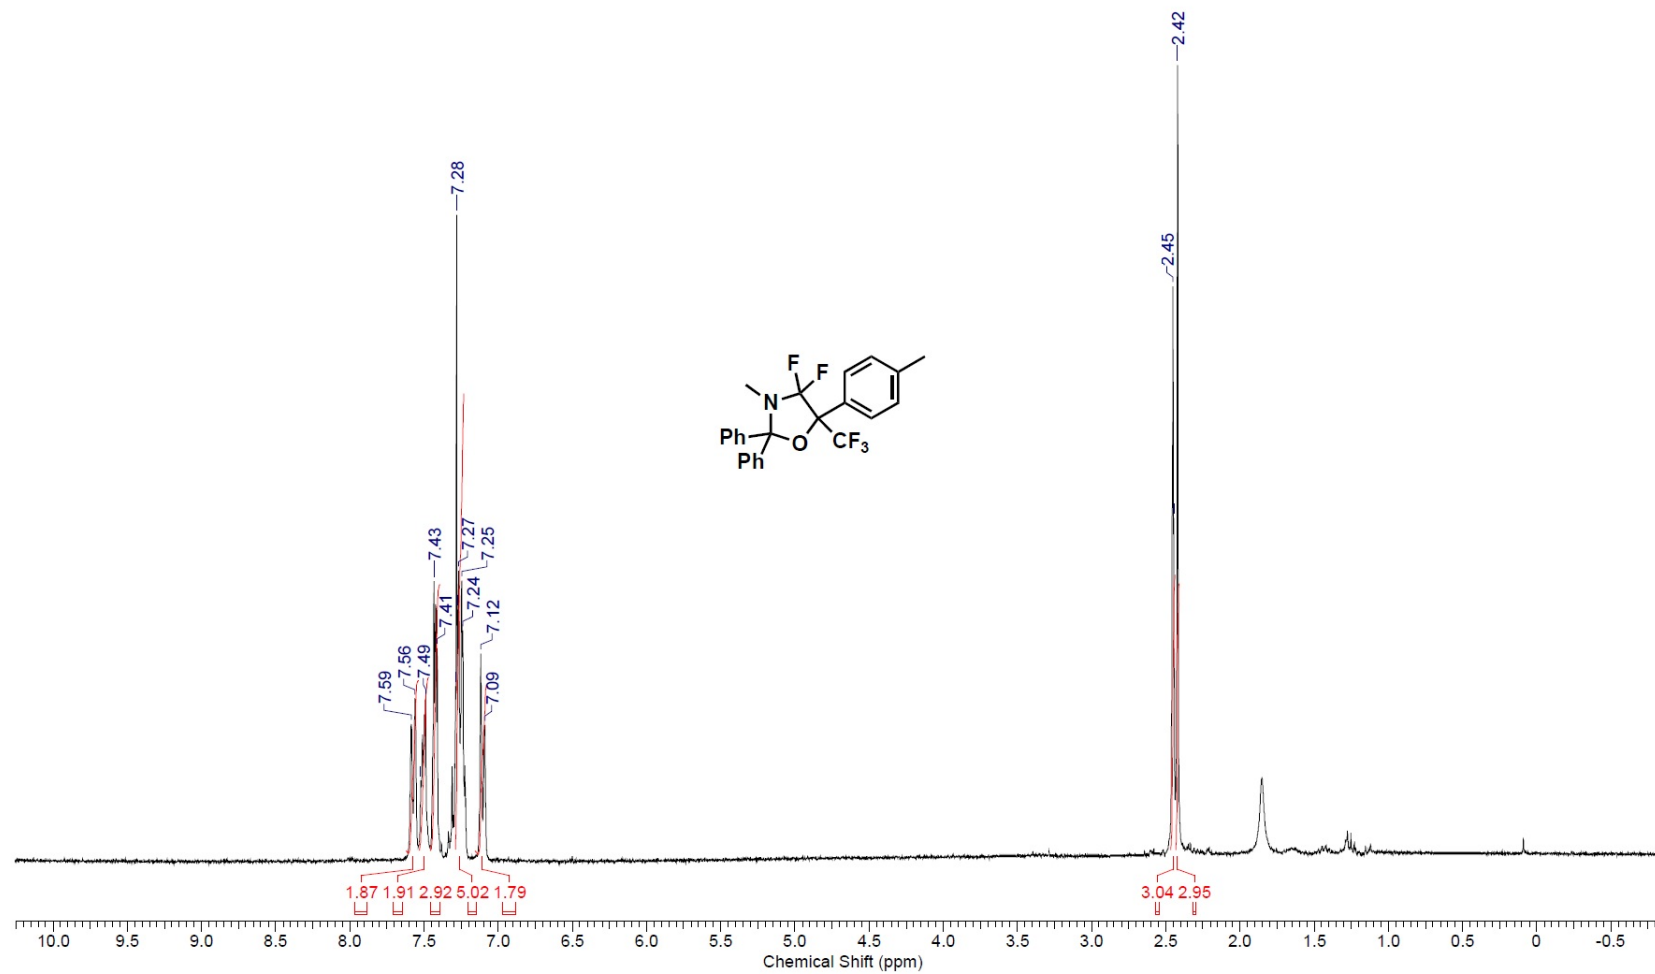

4,4-Difluoro-3-methyl-2,2-diphenyl-5-(p-tolyl)-5-(trifluoromethyl)oxazolidine (28b), 75(<sup>13</sup>C) MHz, CDCl<sub>3</sub>

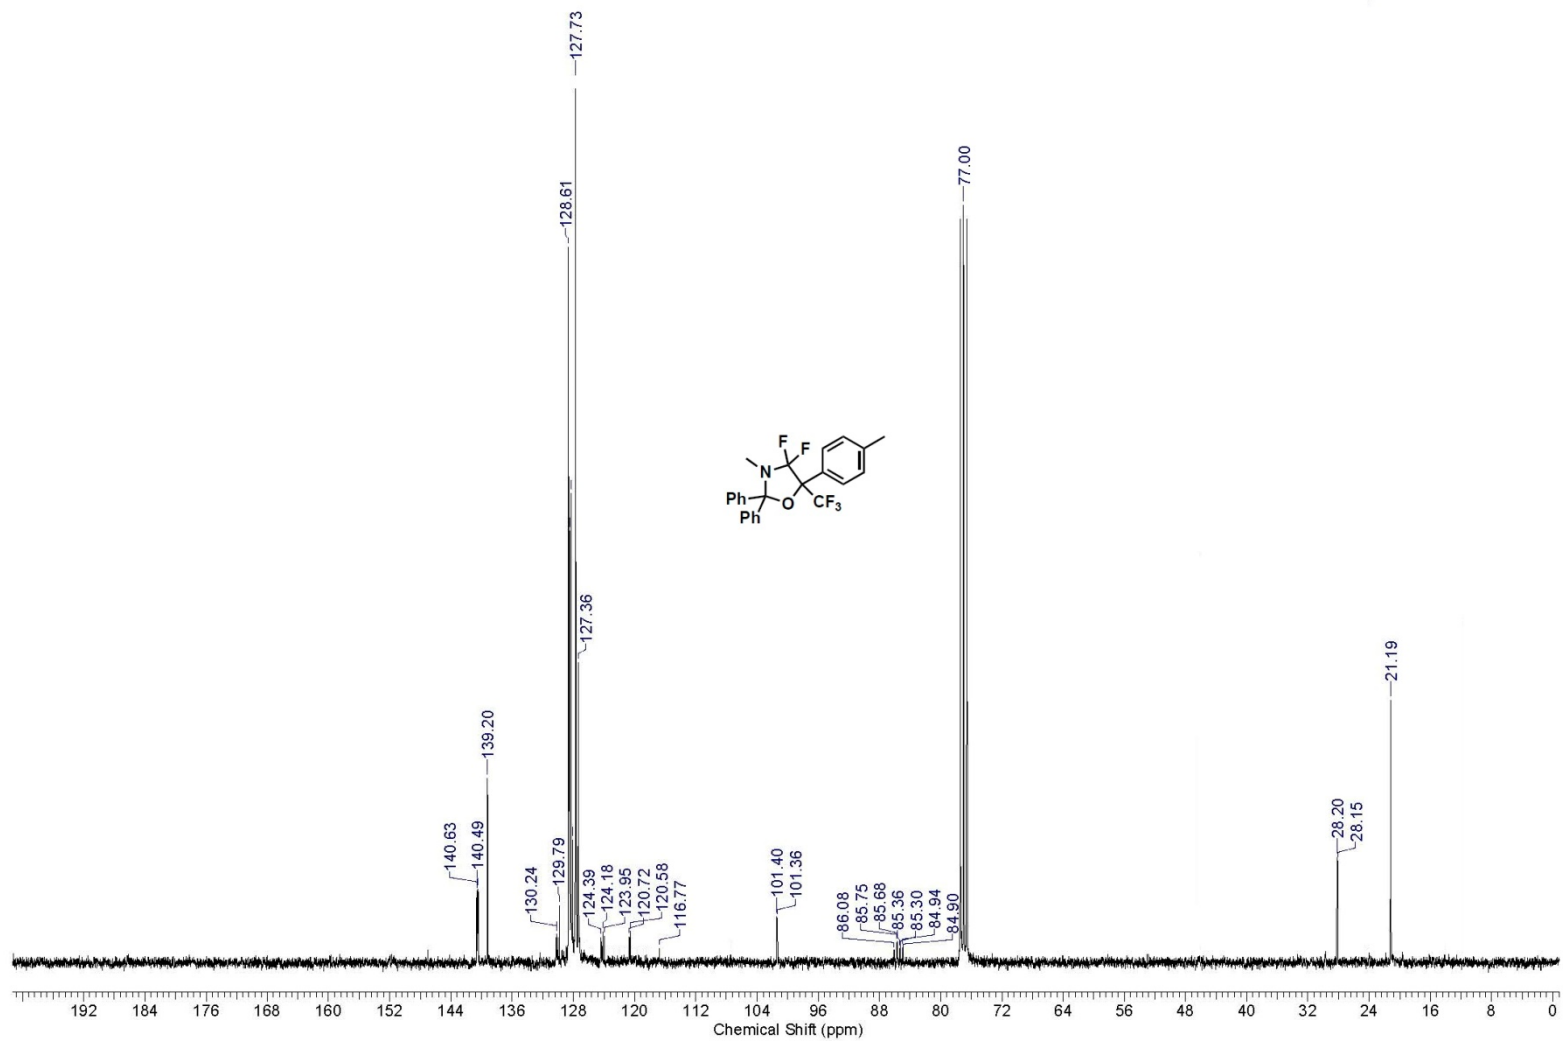



3-Benzyl-4,4-difluoro-2,2,5-triphenyl-5-(trifluoromethyl)oxazolidine (28c), 300(<sup>1</sup>H) MHz, CDCl<sub>3</sub>

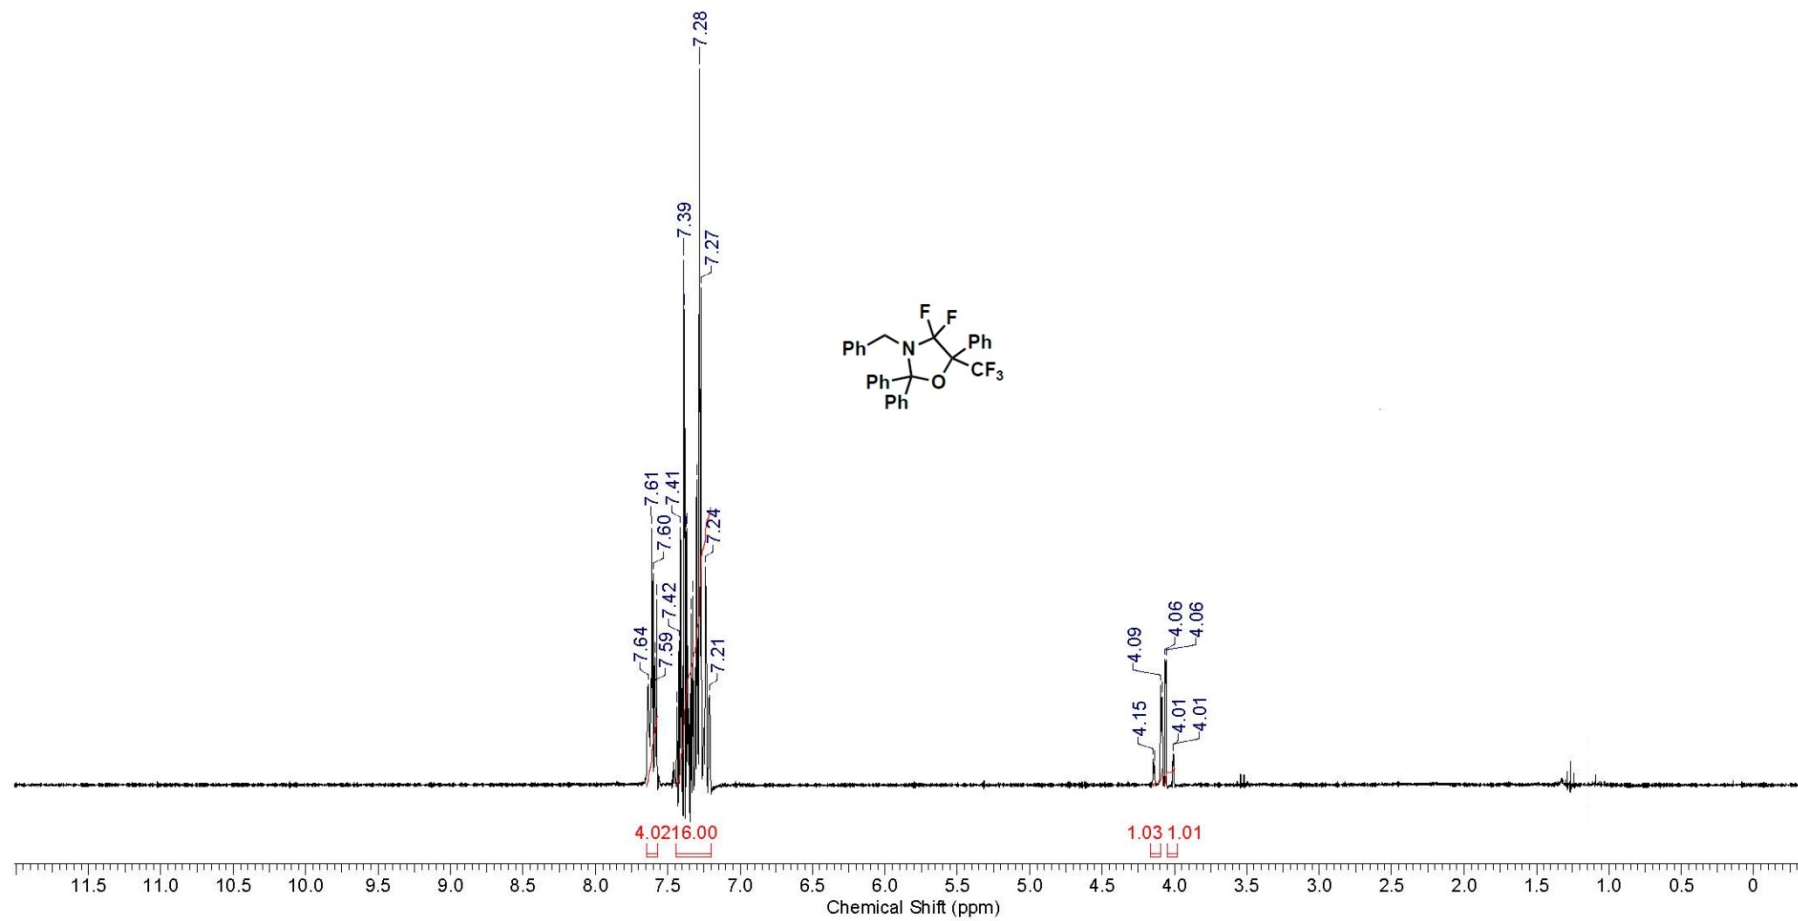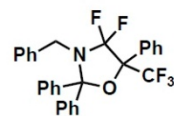

3-Benzyl-4,4-difluoro-2,2,5-triphenyl-5-(trifluoromethyl)oxazolidine (28c), 75(<sup>13</sup>C) MHz, CDCl<sub>3</sub>

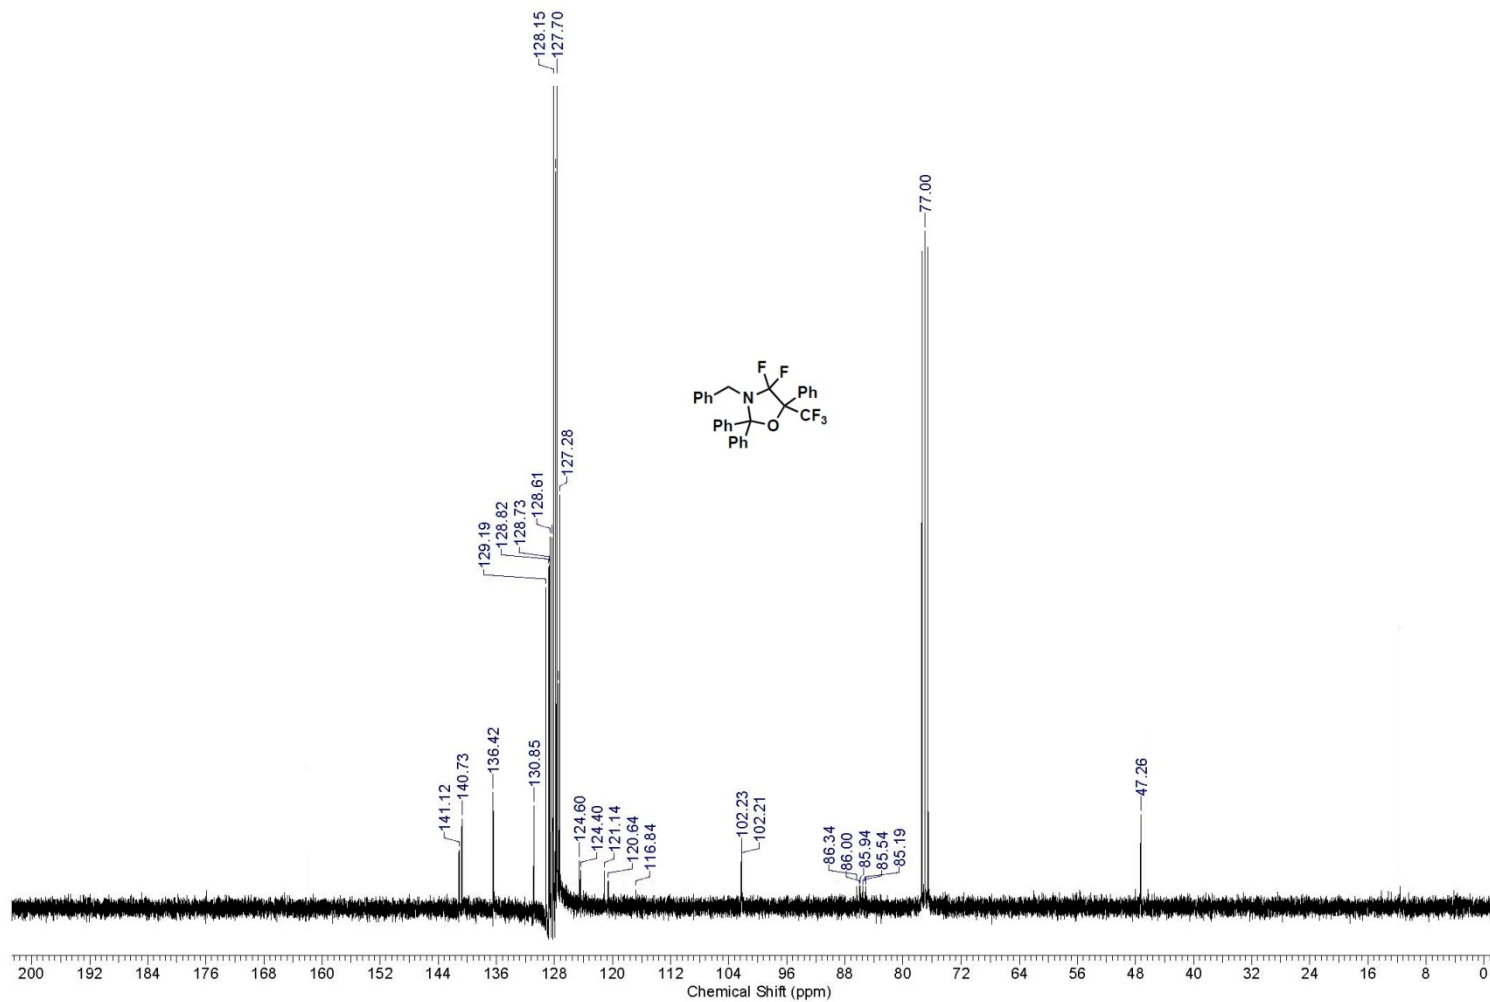

Ethyl 2-(4,4-difluoro-5-(trifluoromethyl)-2,2,5-triphenyloxazolidin-3-yl)acetate (28d), 400(<sup>1</sup>H) MHz, CDCl<sub>3</sub>

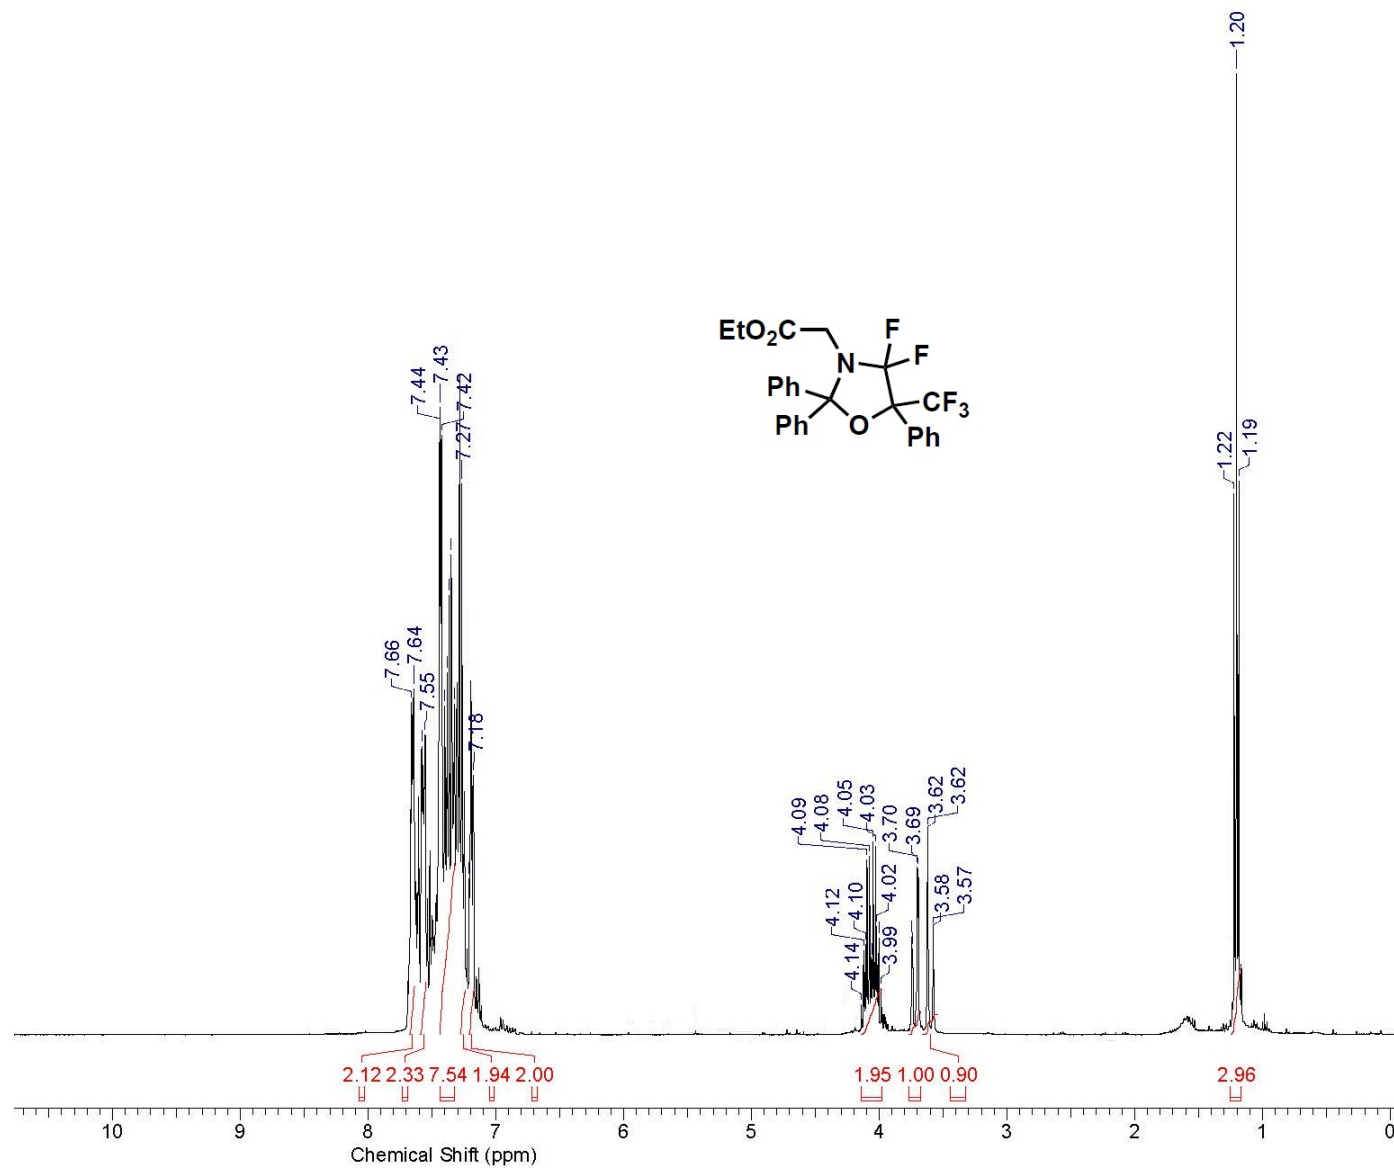

Ethyl 2-(4,4-difluoro-5-(trifluoromethyl)-2,2,5-triphenyloxazolidin-3-yl)acetate (28d), 100(<sup>13</sup>C) MHz, CDCl<sub>3</sub>

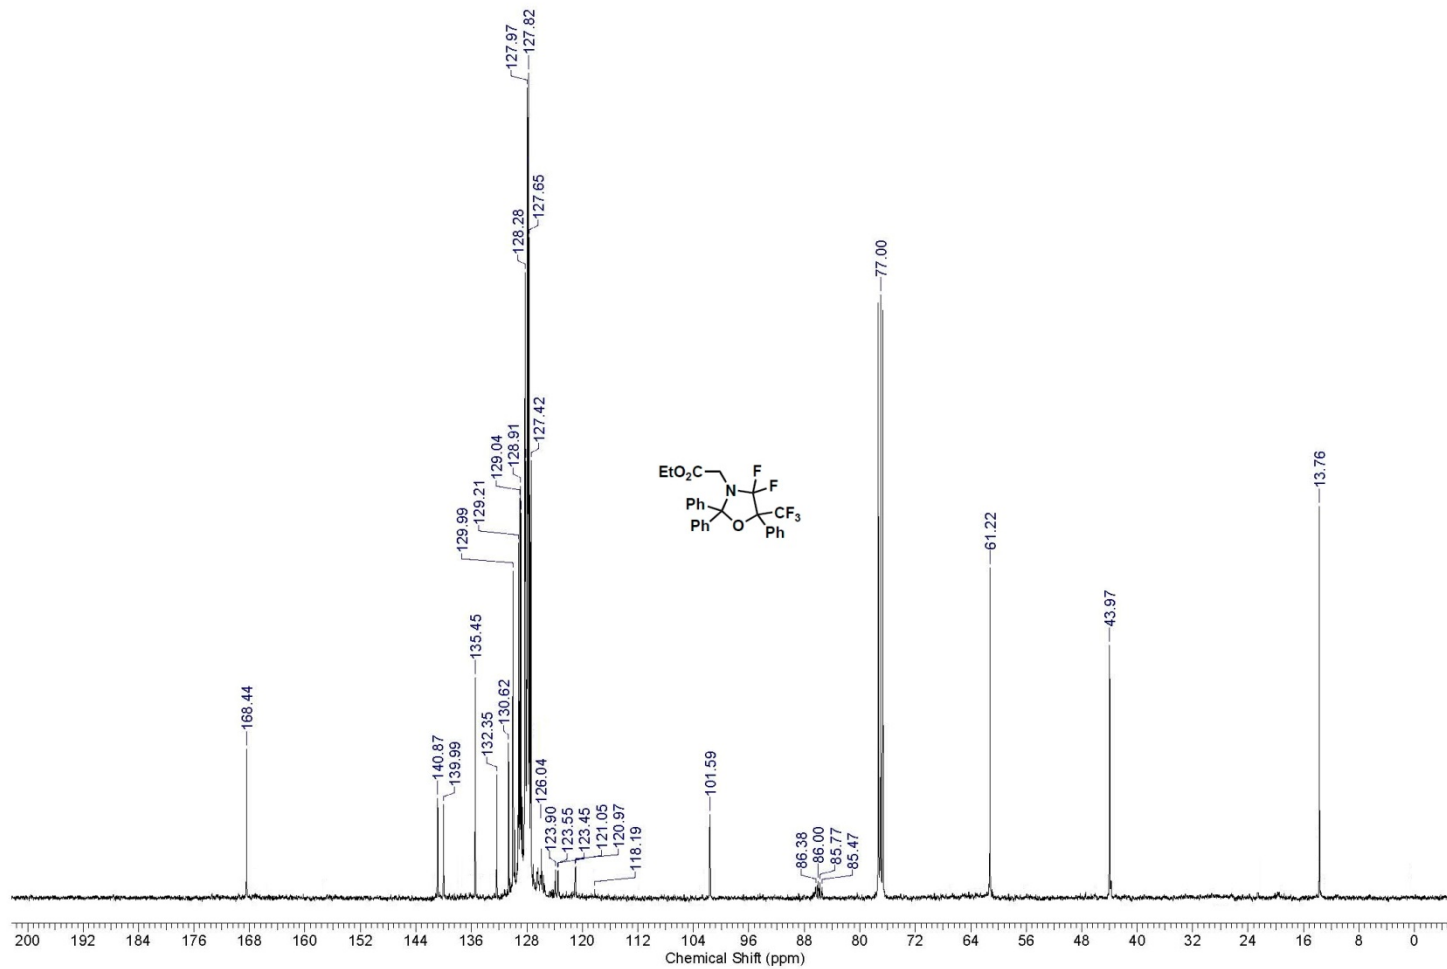

3-Methyl-2,2,5-triphenyl-5-(trifluoromethyl)oxazolidin-4-one (29a), 300(<sup>1</sup>H) MHz, CDCl<sub>3</sub>

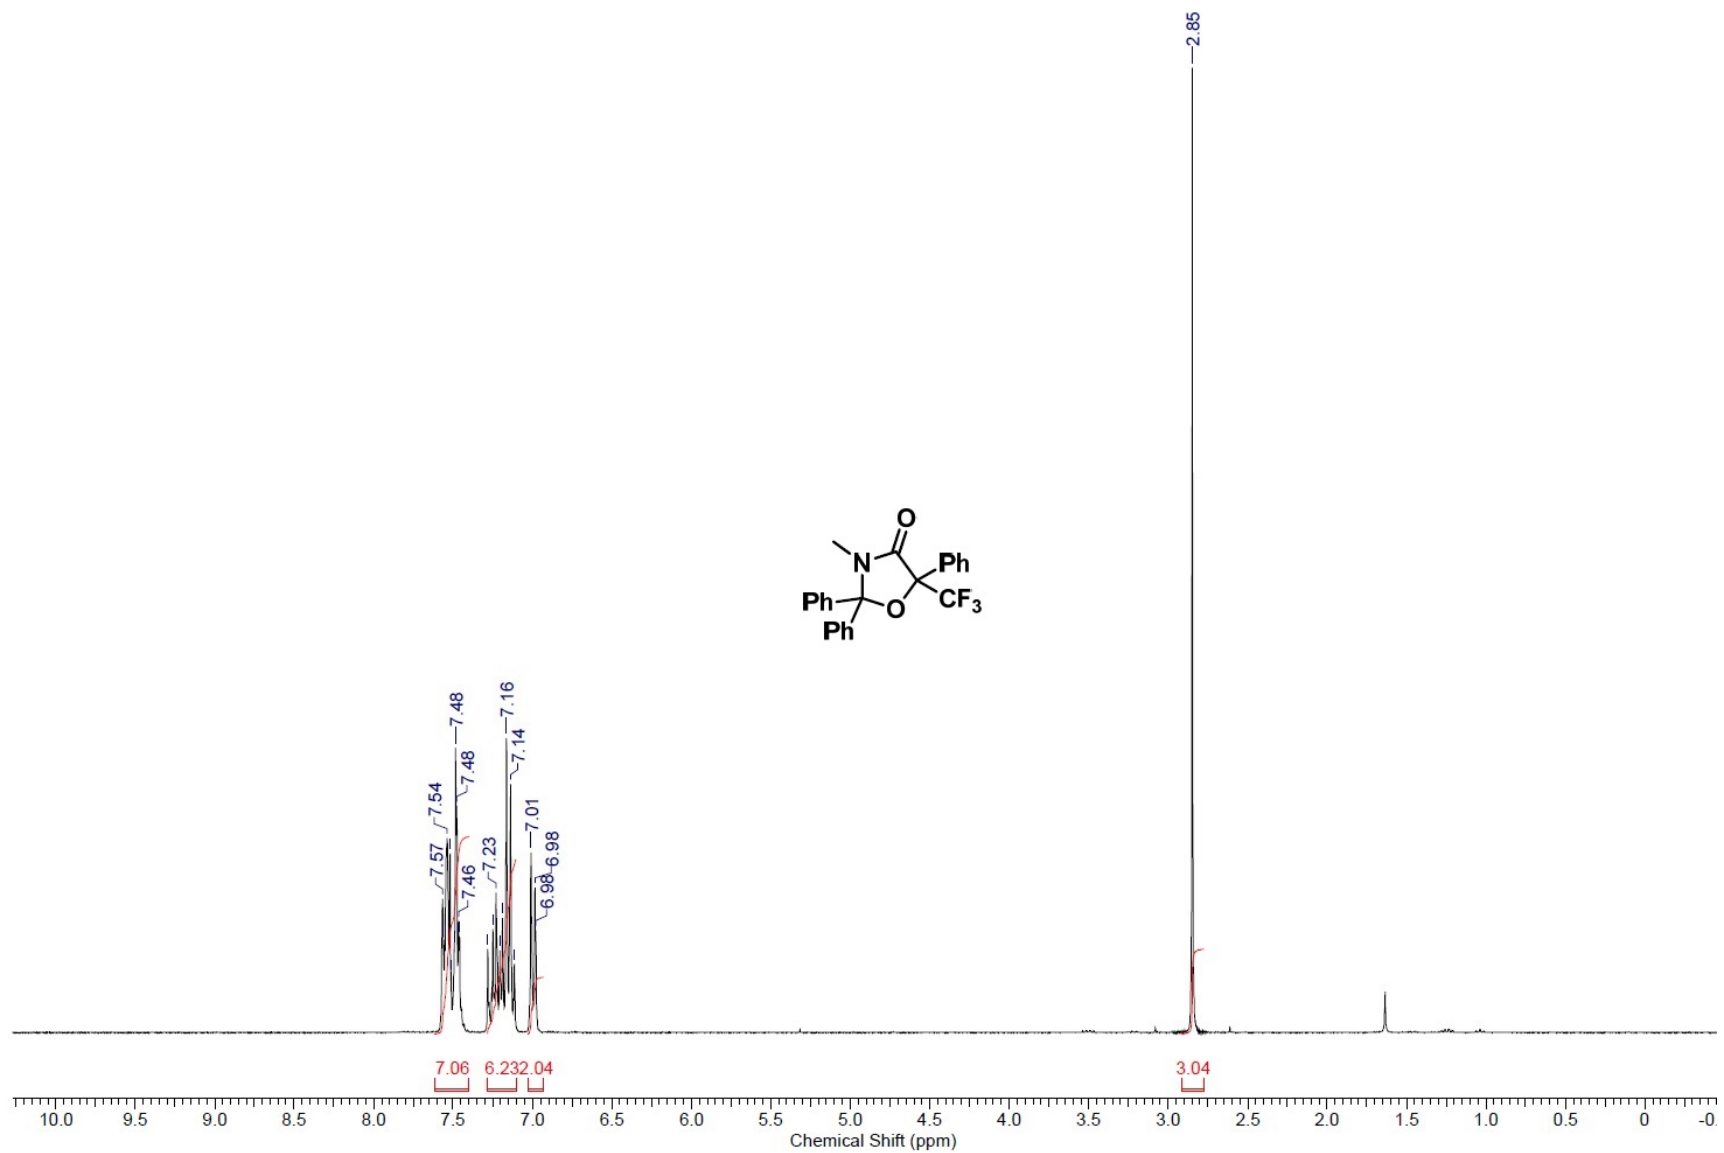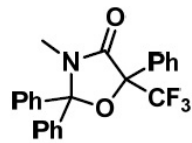

3-Methyl-2,2,5-triphenyl-5-(trifluoromethyl)oxazolidin-4-one (29a), 75(<sup>13</sup>C) MHz, CDCl<sub>3</sub>

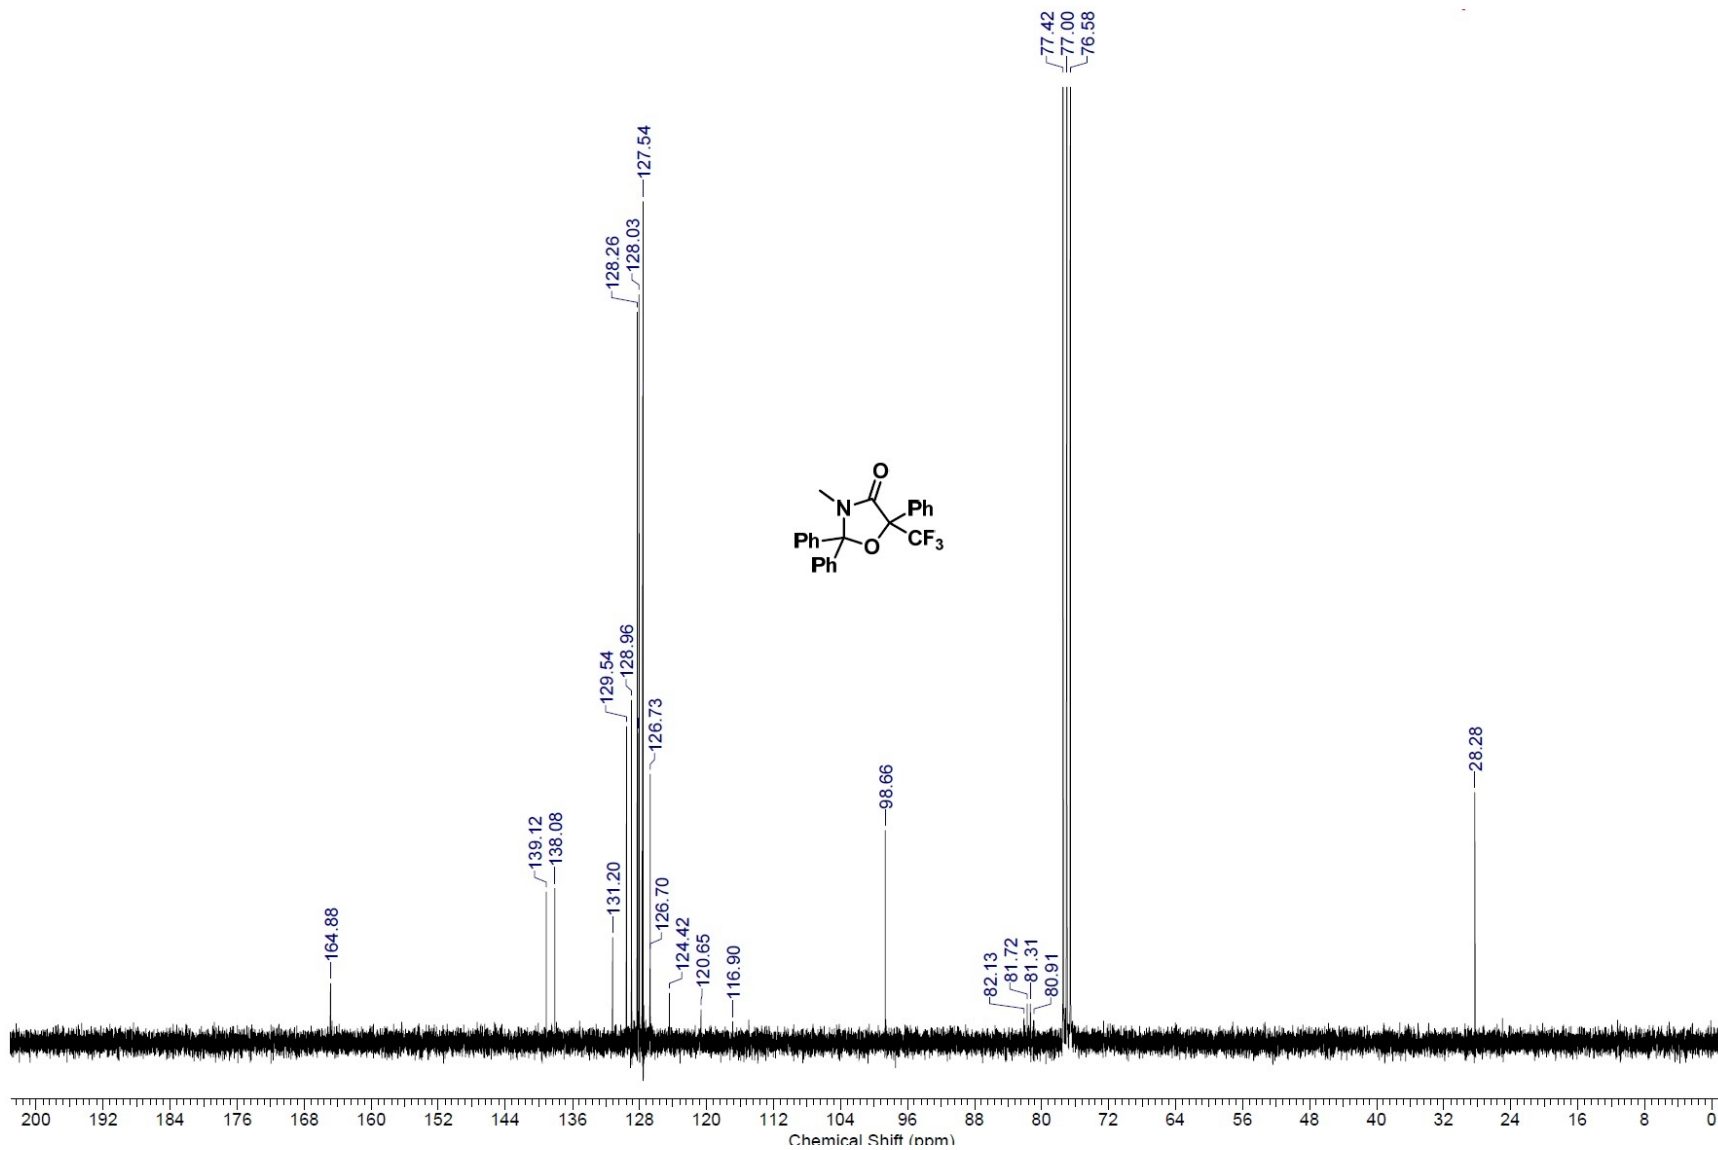

5-(4-Chlorophenyl)-3-methyl-2,2-diphenyl-5-(trifluoromethyl)oxazolidin-4-one (29b), 300(<sup>1</sup>H) MHz, CDCl<sub>3</sub>

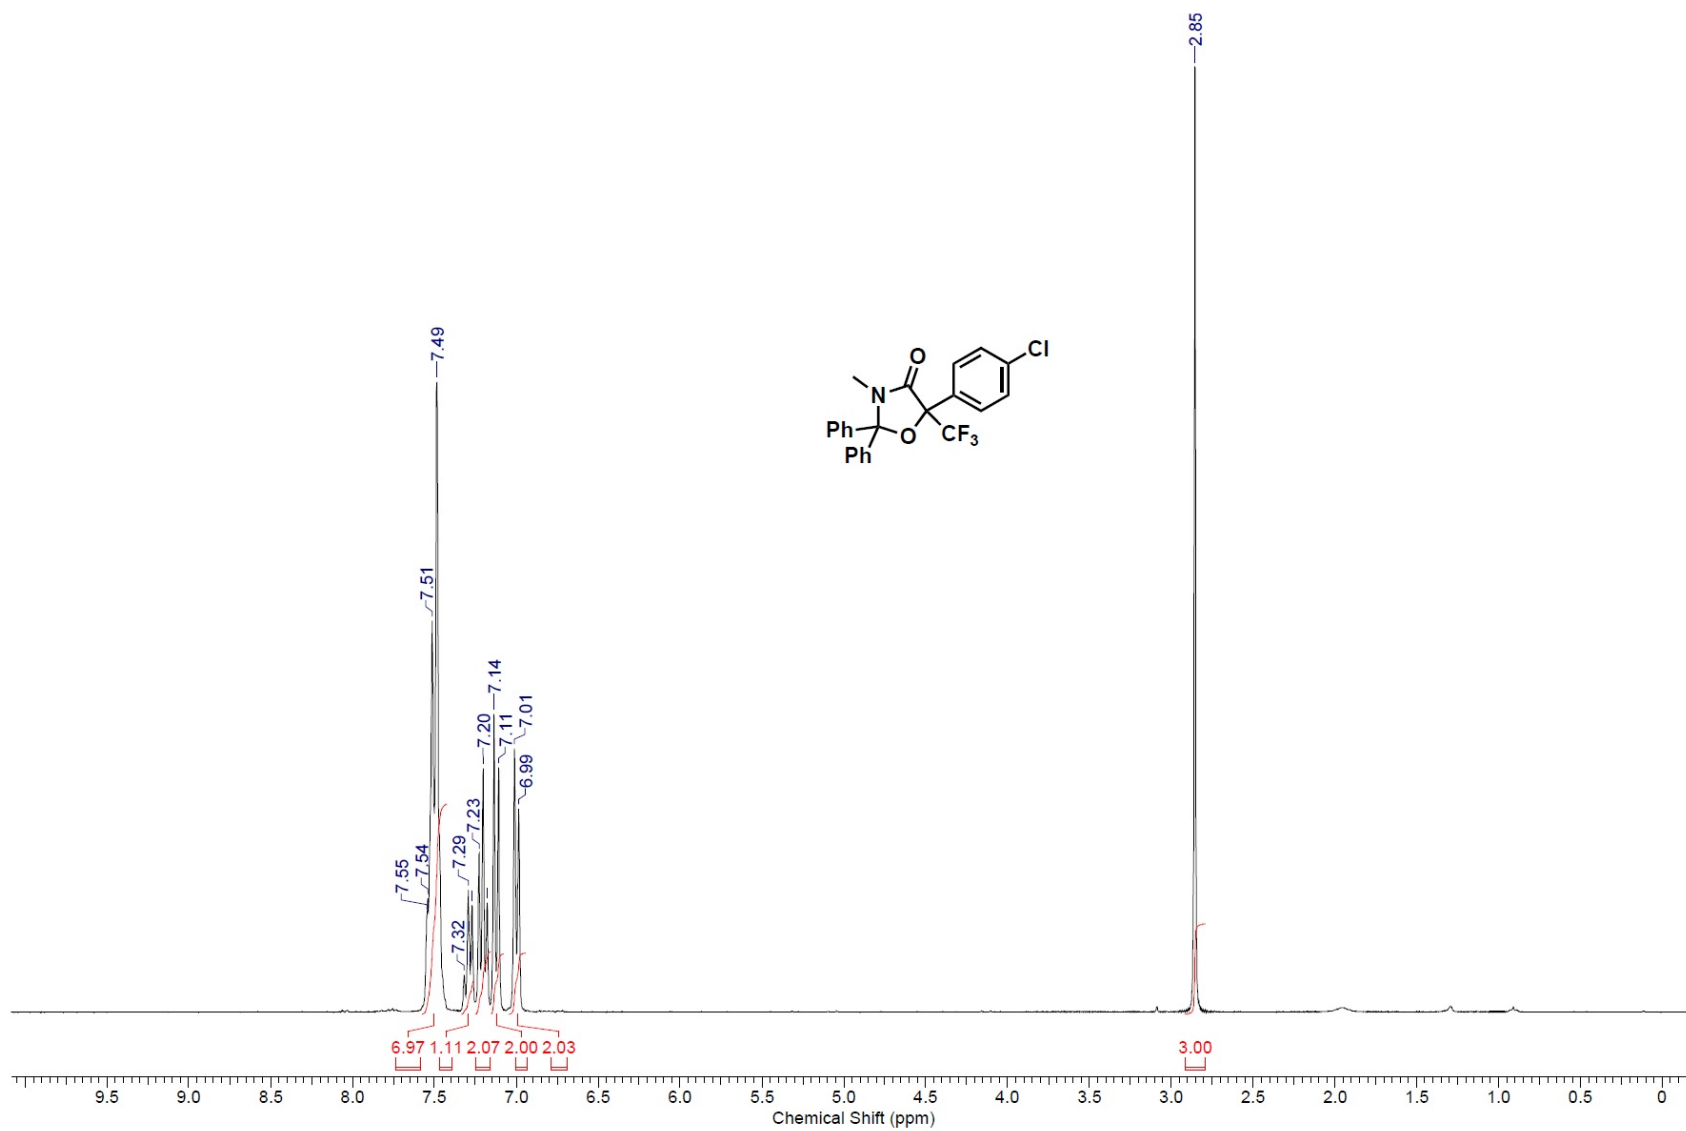

5-(4-Chlorophenyl)-3-methyl-2,2-diphenyl-5-(trifluoromethyl)oxazolidin-4-one (29b), 75(<sup>13</sup>C) MHz, CDCl<sub>3</sub>

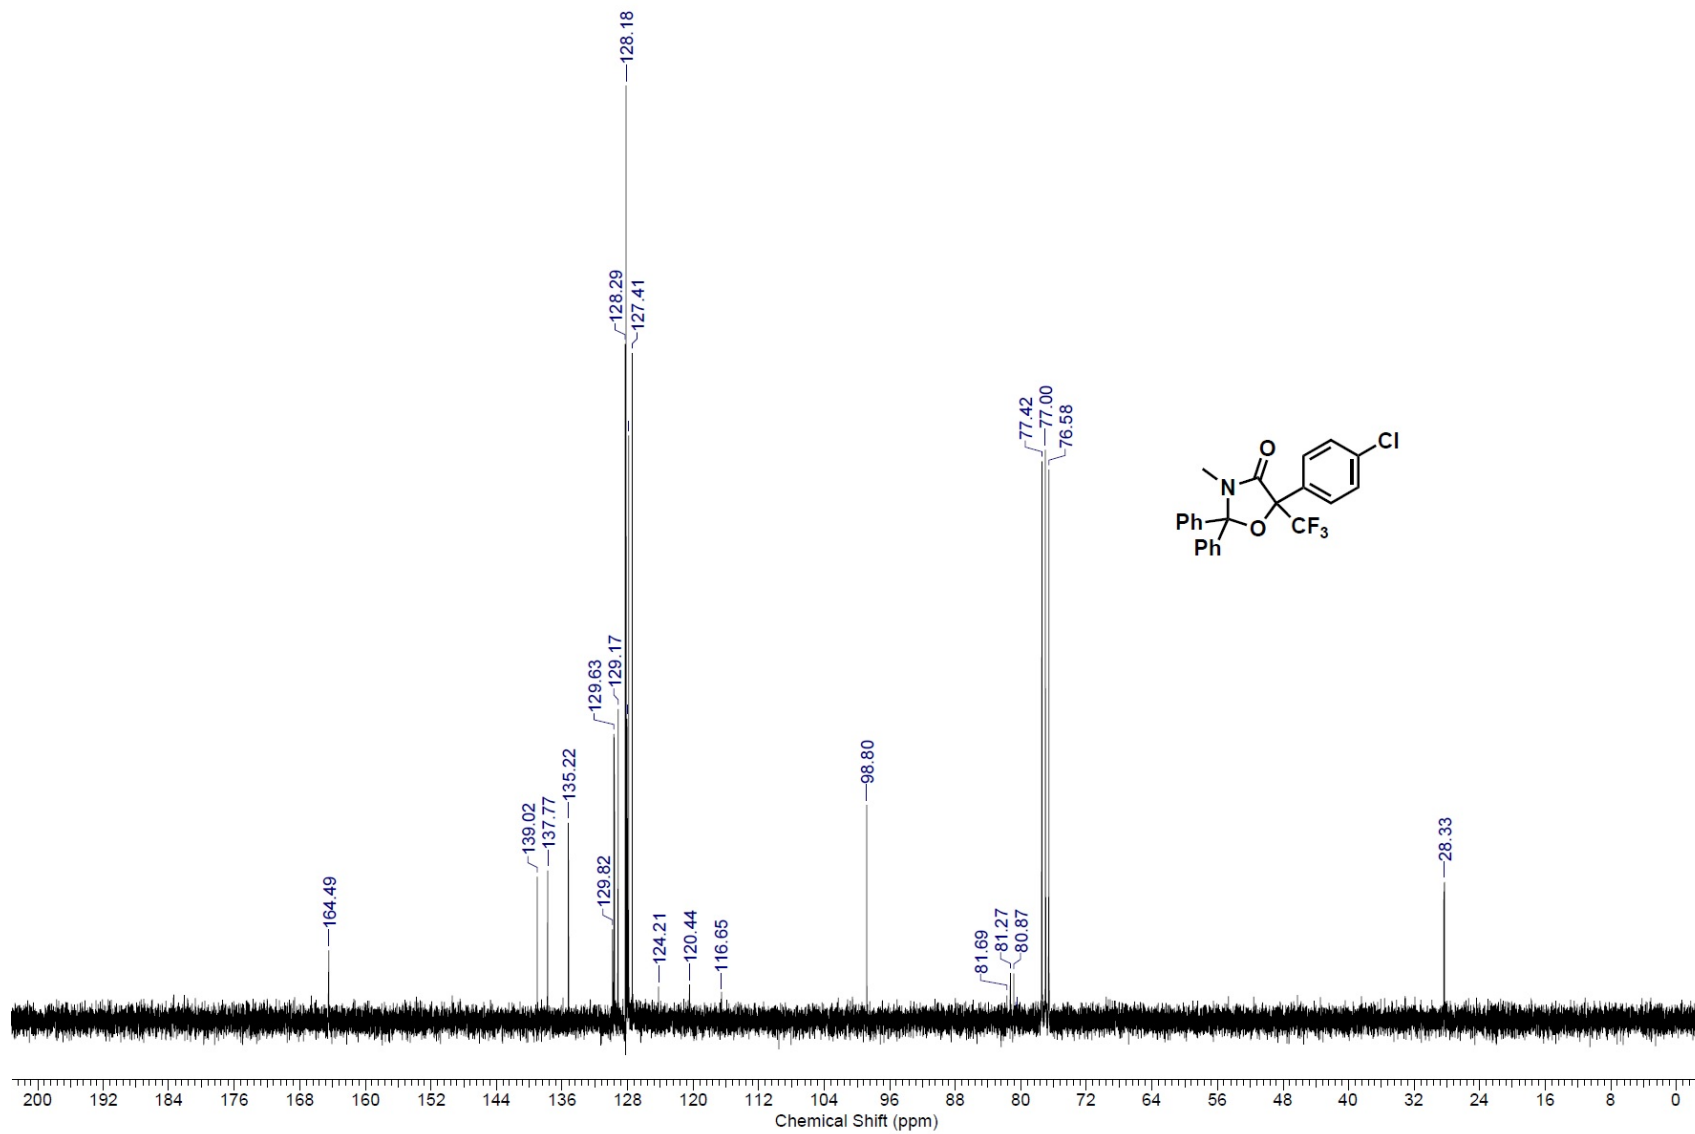



Ethyl 2-(4-oxo-2,2,5-triphenyl-5-(trifluoromethyl)oxazolidin-3-yl)acetate (29c), 400(<sup>1</sup>H) MHz, CDCl<sub>3</sub>

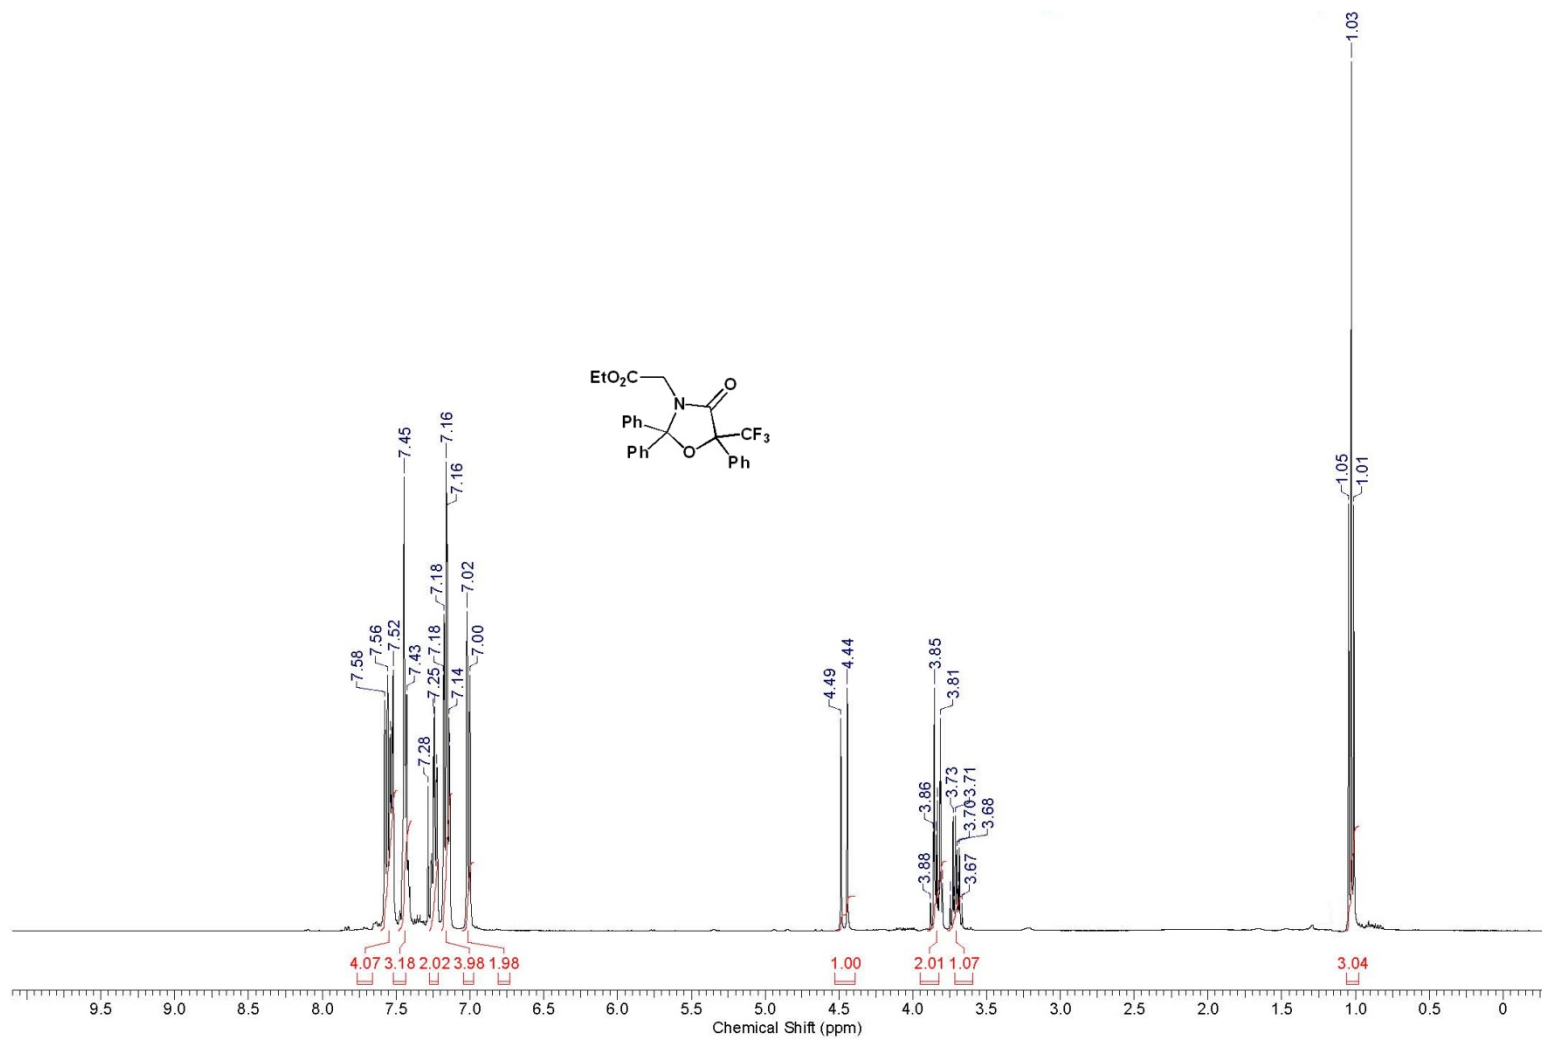

Ethyl 2-(4-oxo-2,2,5-triphenyl-5-(trifluoromethyl)oxazolidin-3-yl)acetate (29c), 100(<sup>1</sup>H) MHz, CDCl<sub>3</sub>

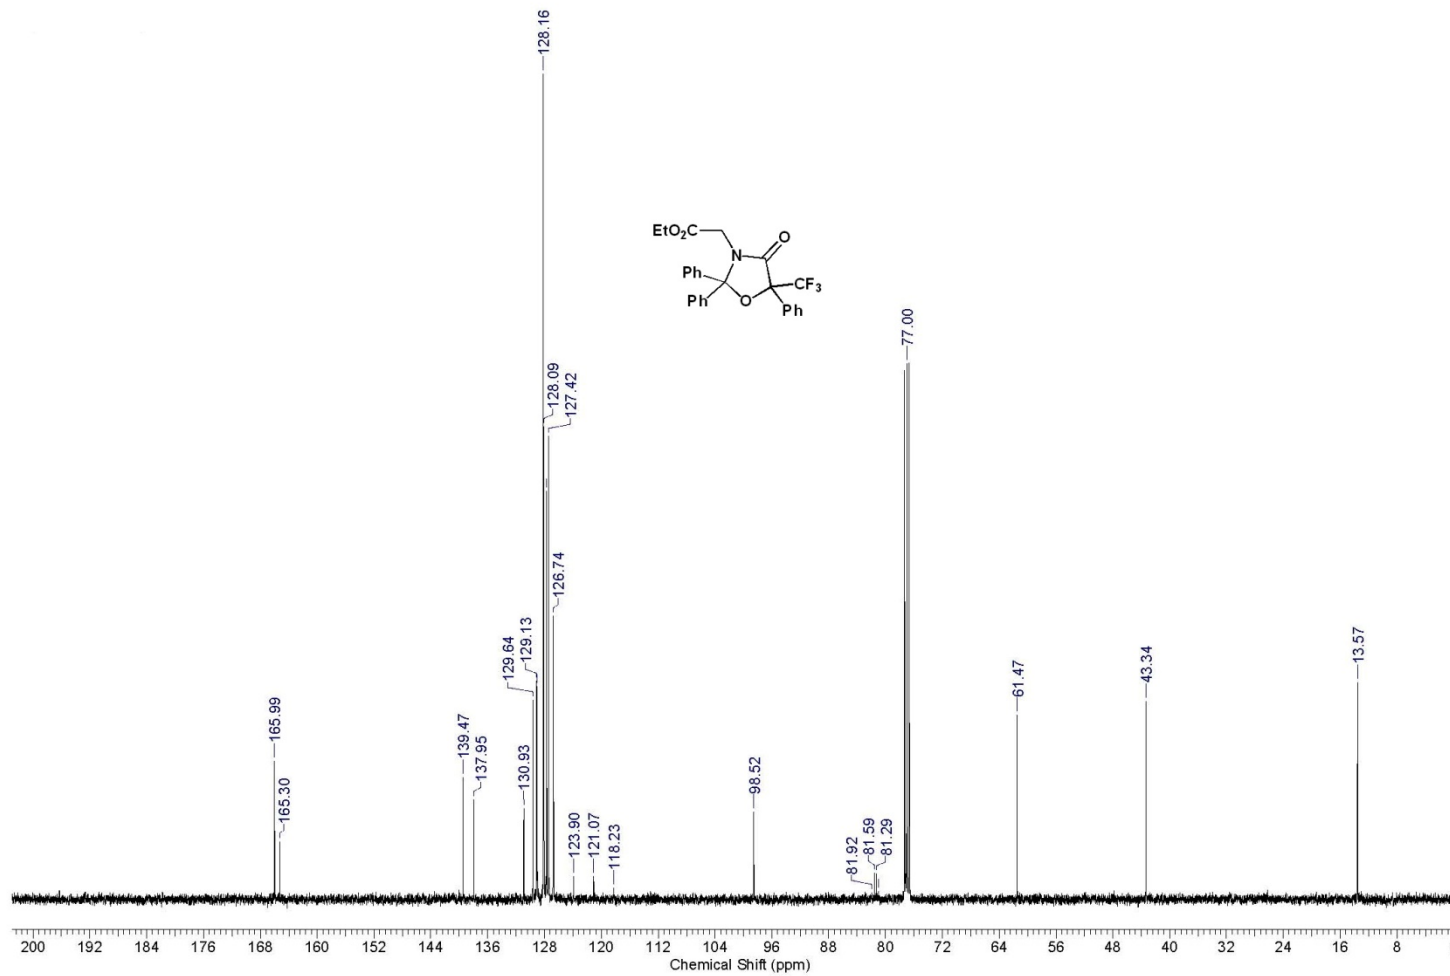

5-Benzyl-3-methyl-2,2-diphenyl-5-(trifluoromethyl)oxazolidin-4-one (29d), 300(<sup>1</sup>H) MHz, CDCl<sub>3</sub>

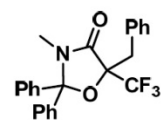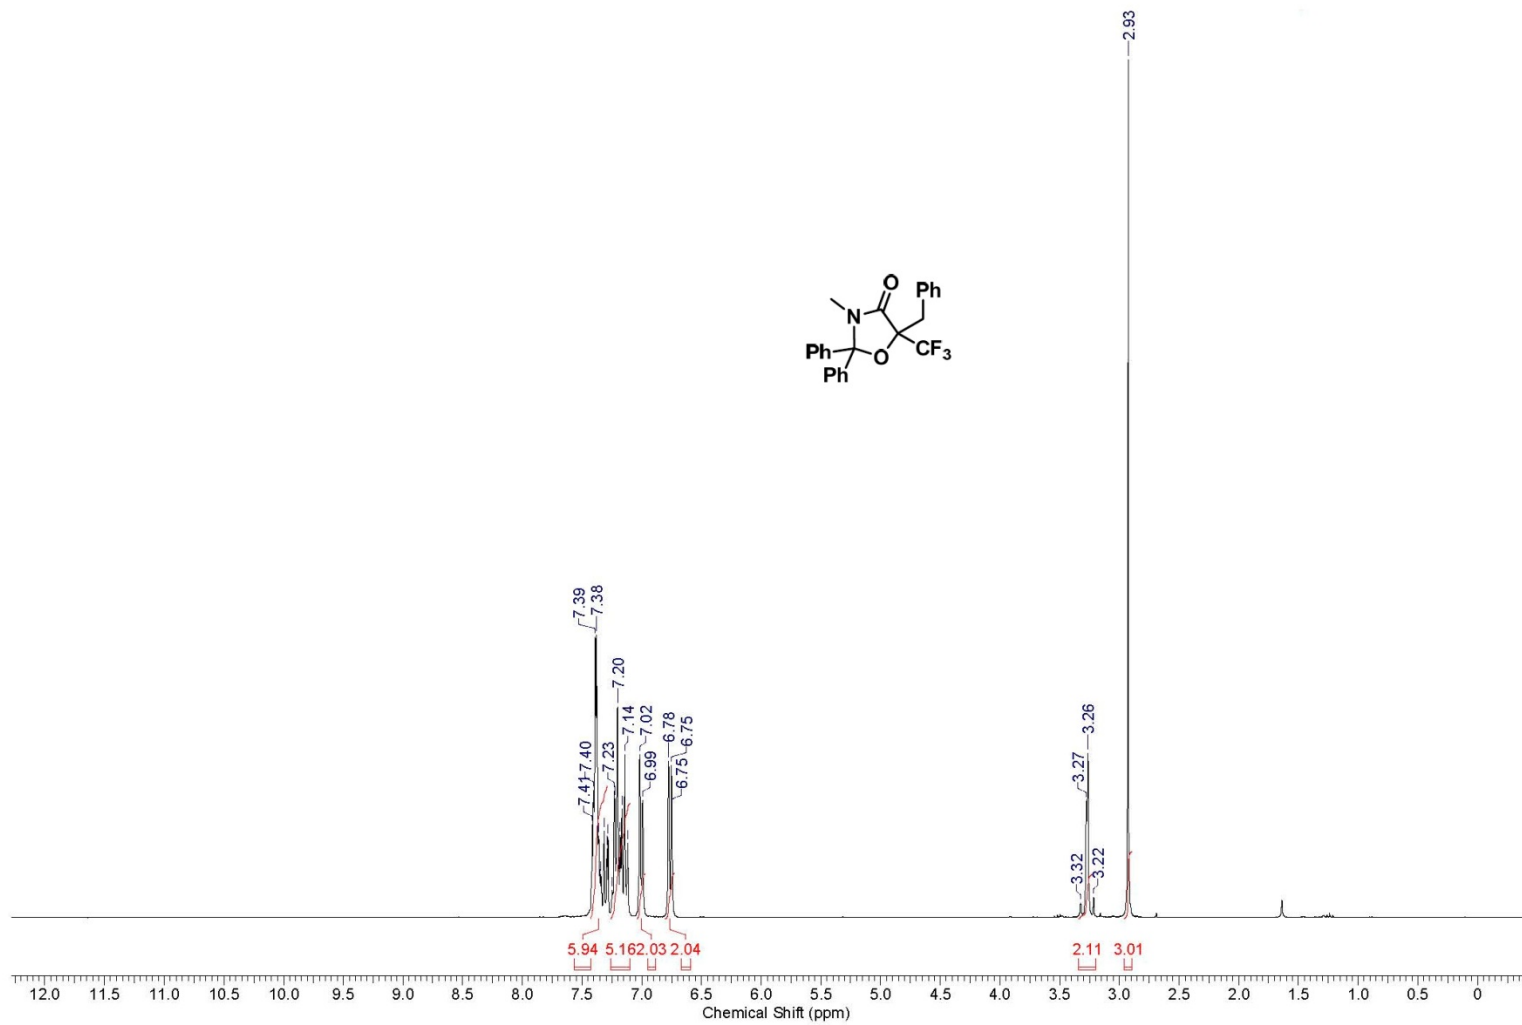

5-Benzyl-3-methyl-2,2-diphenyl-5-(trifluoromethyl)oxazolidin-4-one (29d), 75(<sup>13</sup>C) MHz, CDCl<sub>3</sub>

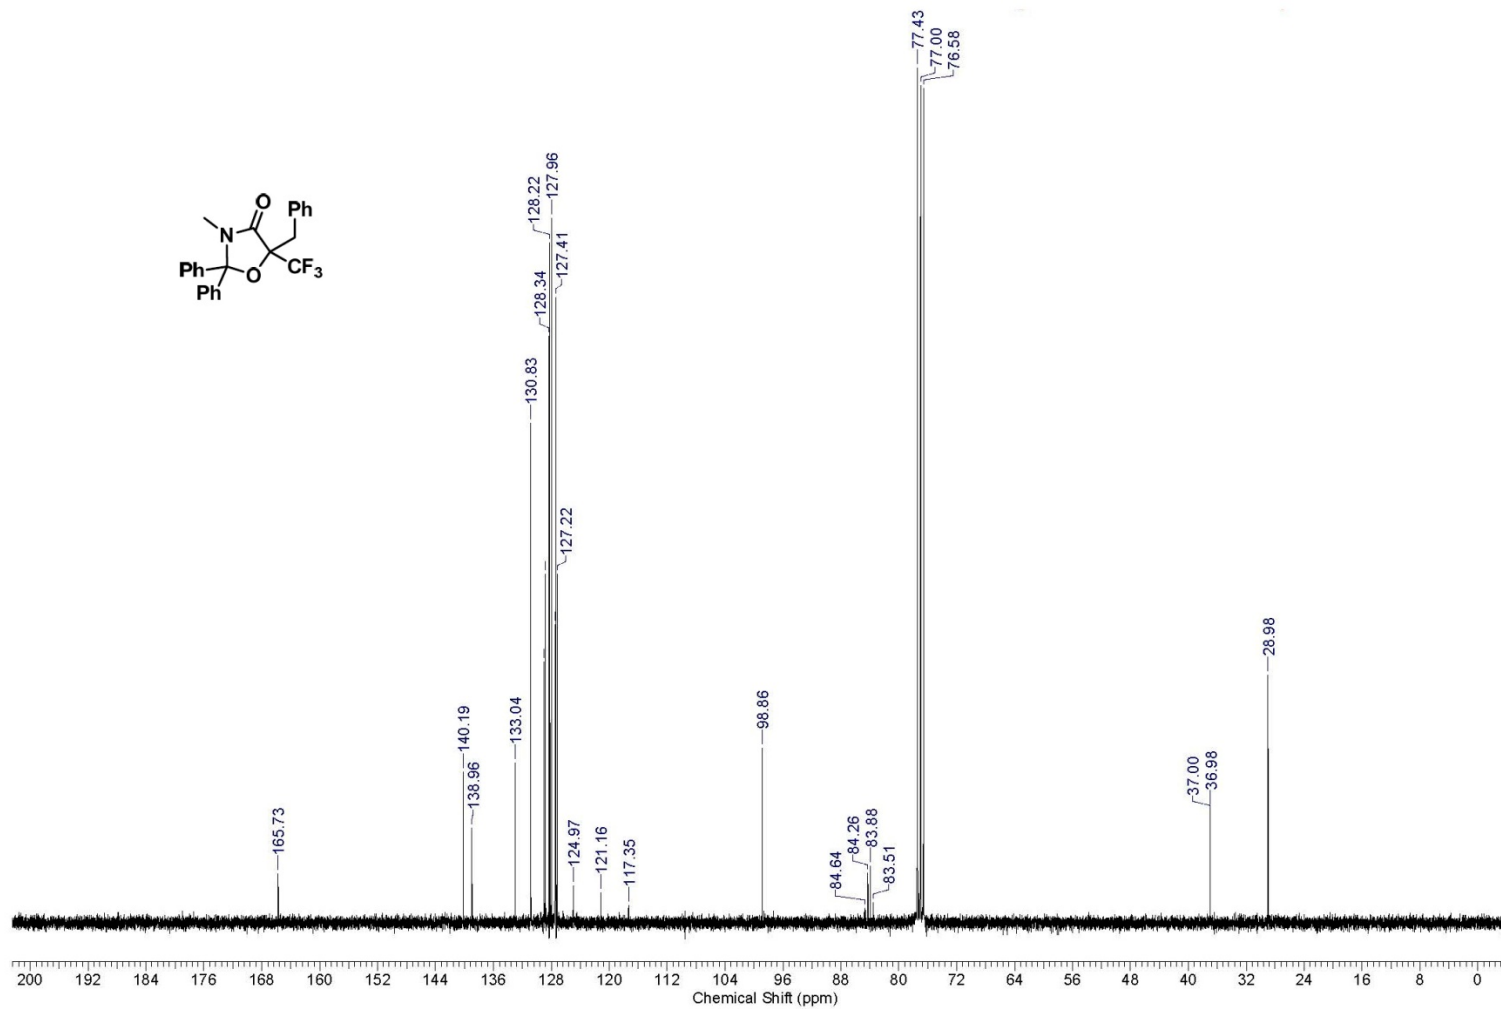

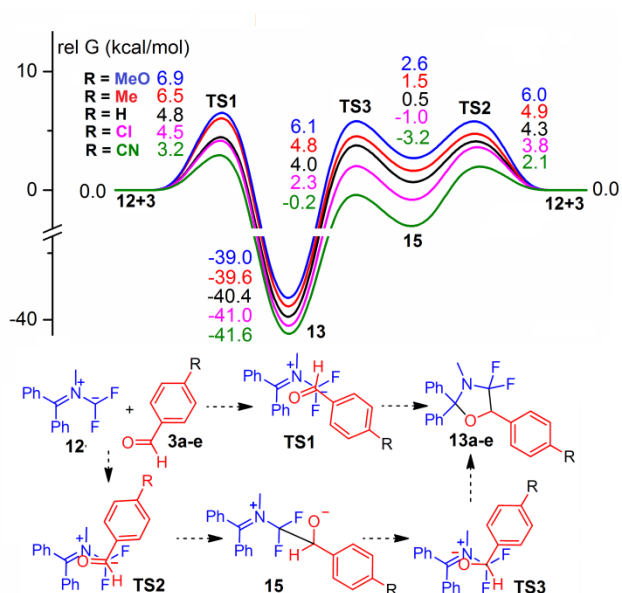

**Figure 3** Energy profiles for the reaction of ylide **12** and benzaldehydes **3a–e**. Relative free *Gibbs* energies (in kcal mol<sup>-1</sup>, 298 K, PCM model for DCM) computed at the DFT B3LYP/6-31G(d).

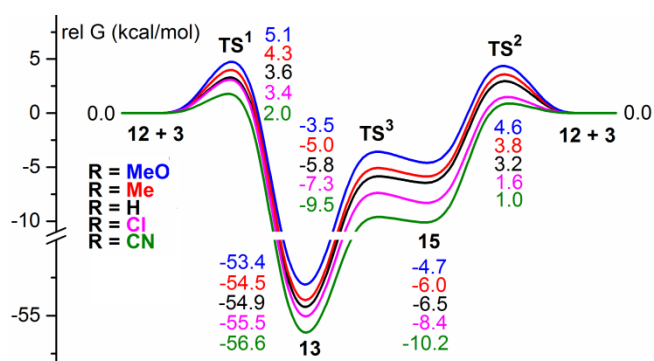

**Figure S3-1** Energy profiles for the reaction of ylide **12** and benzaldehydes **3a–e**. Relative free *Gibbs* energies (in kcal mol<sup>-1</sup>, 298 K, PCM model for DCM), single point calculation at the DFT wb97XD/6-311G(d,p) level with B3LYP/6-31G(d) optimized geometries.

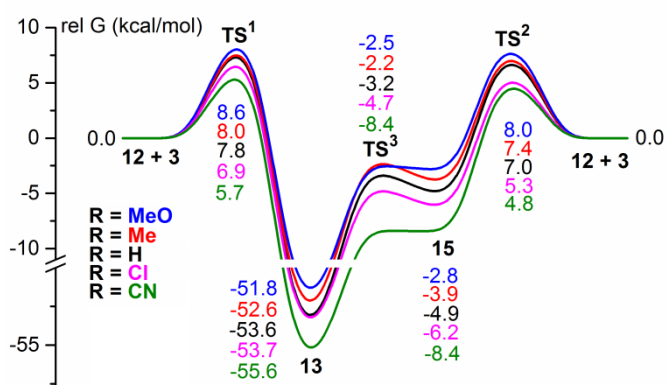

**Figure S3-2** Energy profiles for the reaction of ylide **12** and benzaldehydes **3a–e**. Relative free *Gibbs* energies (in kcal mol<sup>-1</sup>, 298 K, PCM model for DCM), single point calculation at the DFT MPWB1K/6-311G(d,p) level with B3LYP/6-31G(d) optimized geometries.

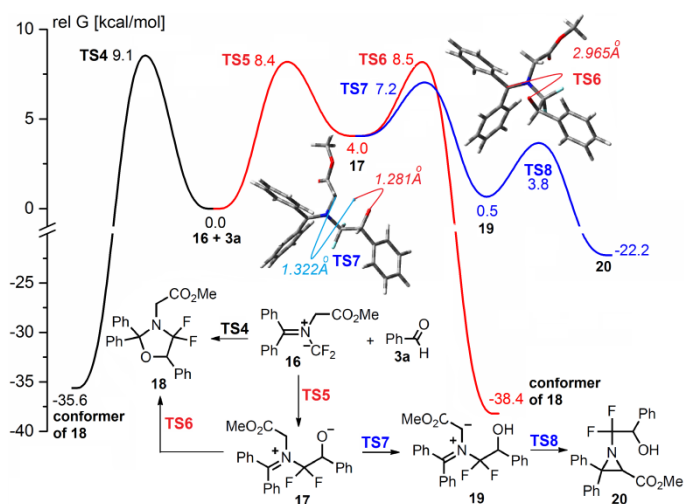

**Figure 4** Energy profiles for the transformations of **16**. Relative free *Gibbs* energies (in kcal mol<sup>-1</sup>, 298 K, PCM model for DCM) computed at the DFT B3LYP/6-31G(d) level.

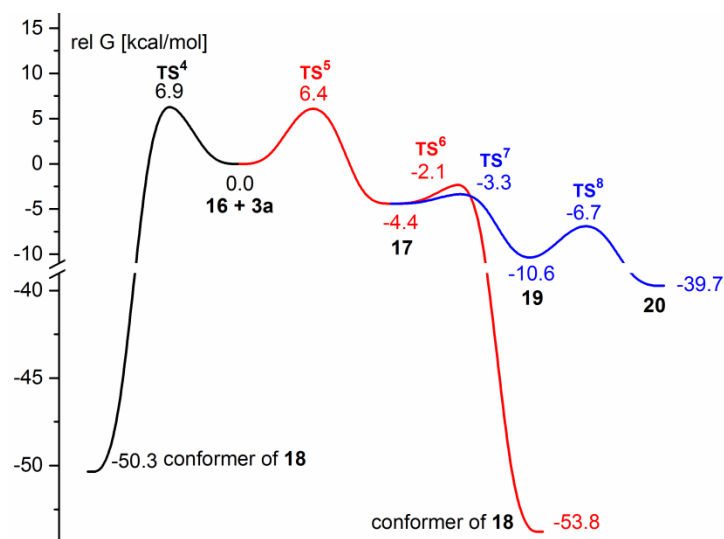

**Figure S4-1** Energy profiles for the transformations of **16**. Relative free *Gibbs* energies (in kcal mol<sup>-1</sup>, 298 K, PCM model for DCM), single point calculation at the DFT MPWB1K/6-311G(d,p) level with B3LYP/6-31G(d) optimized geometries.

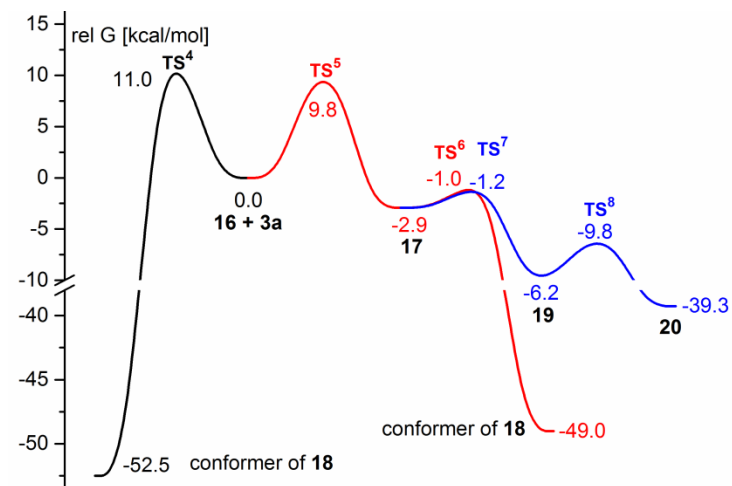

**Figure S4-2** Energy profiles for the transformations of **16**. Relative free *Gibbs* energies (in kcal mol<sup>-1</sup>, 298 K, PCM model for DCM), single point calculation at the DFT wB97XD/6-311G(d,p) level with B3LYP/6-31G(d) optimized geometries.

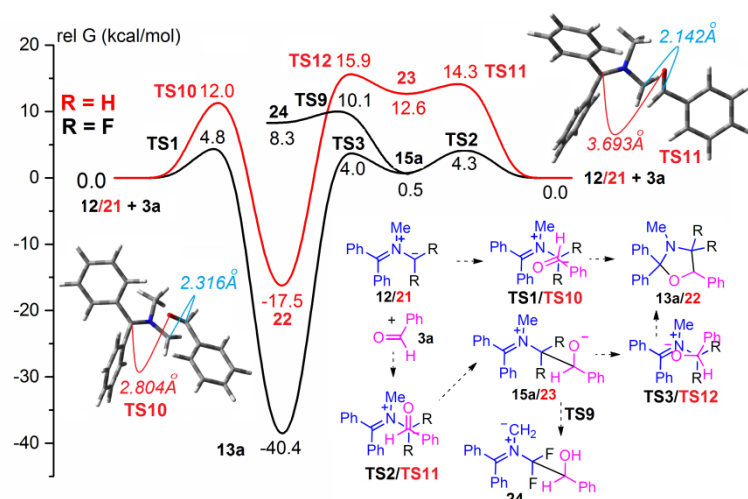

**Figure 5** Energy profiles for the reactions of benzaldehyde **3a** with fluorinated ylide **12** and non-fluorinated ylide **21**. Relative free *Gibbs* energies (in kcal mol<sup>-1</sup>, 298 K, PCM model for DCM) computed at the DFT B3LYP/6-31G(d) level.

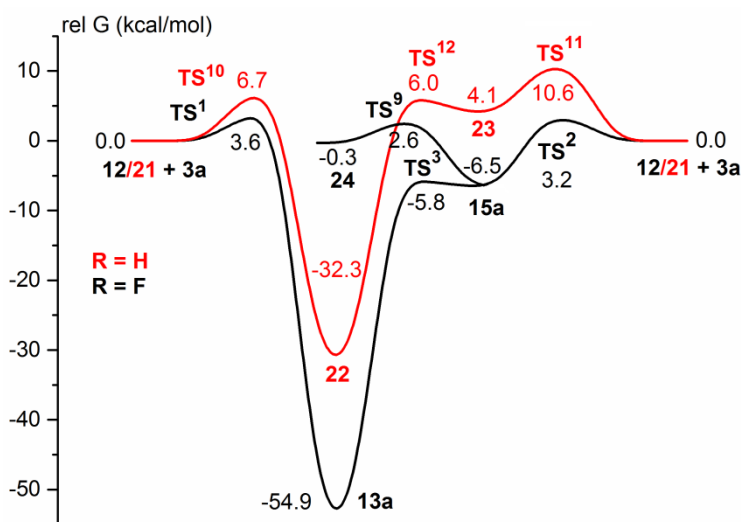

**Figure S5-1** Energy profiles for the reactions of benzaldehyde **3a** with fluorinated ylide **12** and non-fluorinated ylide **21**. Relative free *Gibbs* energies (in kcal mol<sup>-1</sup>, 298 K, PCM model for DCM), single point calculation at the DFT wB97XD/6-311G(d,p) level with B3LYP/6-31G(d) optimized geometries.

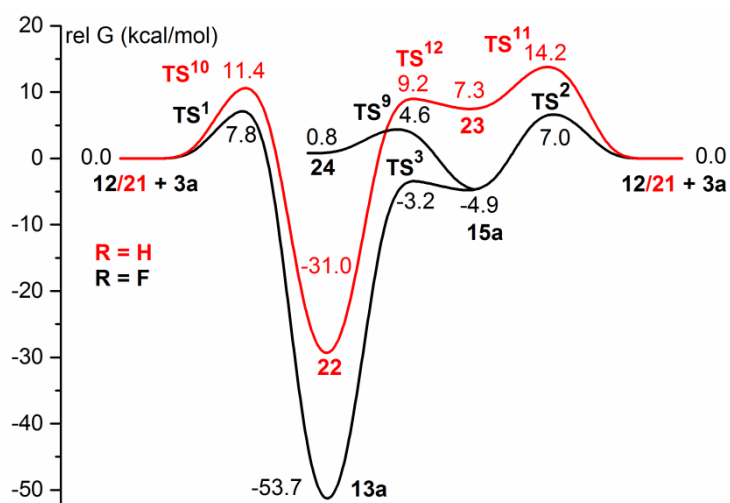

**Figure S5-2** Energy profiles for the reactions of benzaldehyde **3a** with fluorinated ylide **12** and non-fluorinated ylide **21**. Relative free *Gibbs* energies (in kcal mol<sup>-1</sup>, 298 K, PCM model for DCM), single point calculation at the DFT MPWB1K/6-311G(d,p) level with B3LYP/6-31G(d) optimized geometries.

## Computational Details

All calculations were performed with the B3LYP density functional method<sup>1</sup> by using the Gaussian 09 suite of quantum chemical programs<sup>2</sup> at Resource center "Computer center of Saint Petersburg State University". Geometry optimizations of intermediates, transition states, reactants, and products in dichloromethane were performed at the DFT B3LYP/6-31G(d) level using PCM model.<sup>3</sup> Stationary points on the respective potential-energy surfaces were characterized at the same level of theory by evaluating the corresponding Hessian indices. Careful verification of the unique imaginary frequencies for transition states was carried out to check whether the frequency indeed pertains to the desired reaction coordinate.

**Table 2.** B3LYP/6-31G(d) Absolute Energies (au), Cartesian Coordinates of stationary points

| Molecule 3a                                                                                                                |            |            |            | Molecule 3b                                                                                                                |            |            |            |
|----------------------------------------------------------------------------------------------------------------------------|------------|------------|------------|----------------------------------------------------------------------------------------------------------------------------|------------|------------|------------|
| E = -345.57857499, H (0K) = -345.468308,<br>H (298K) = -345.461065, G (298K) = -345.498856 au.<br>Imaginary frequency = 0. |            |            |            | E = -384.89766830, H (0K) = -384.759965,<br>H (298K) = -384.750840, G (298K) = -384.793839 au<br>Imaginary frequency = 0.  |            |            |            |
| O                                                                                                                          | -2.8516140 | -0.3953040 | -0.0000620 | O                                                                                                                          | 3.3173990  | -0.5498270 | 0.0015970  |
| C                                                                                                                          | -1.9888660 | 0.4684650  | 0.0000450  | C                                                                                                                          | 2.5128960  | 0.3699440  | 0.0011480  |
| C                                                                                                                          | -0.5351790 | 0.2106920  | 0.0000220  | C                                                                                                                          | 1.0484360  | 0.2115830  | 0.0001980  |
| C                                                                                                                          | 0.3573470  | 1.2922130  | -0.0000050 | C                                                                                                                          | 0.2250540  | 1.3450880  | -0.0005100 |
| C                                                                                                                          | 1.7328960  | 1.0637050  | -0.0000150 | C                                                                                                                          | -1.1617320 | 1.2062470  | -0.0020880 |
| C                                                                                                                          | 2.2176060  | -0.2470100 | -0.0000110 | C                                                                                                                          | -1.7557900 | -0.0633870 | -0.0024420 |
| C                                                                                                                          | 1.3303500  | -1.3312440 | 0.0000040  | C                                                                                                                          | -0.9198840 | -1.1969650 | -0.0026360 |
| C                                                                                                                          | -0.0420690 | -1.1047440 | 0.0000270  | C                                                                                                                          | 0.4611960  | -1.0658200 | -0.0009430 |
| H                                                                                                                          | -2.2690920 | 1.5433170  | 0.0001300  | H                                                                                                                          | 2.8650030  | 1.4235610  | 0.0015920  |
| H                                                                                                                          | -0.0306280 | 2.3083130  | -0.0000180 | H                                                                                                                          | 0.6733340  | 2.3362210  | -0.0006880 |
| H                                                                                                                          | 2.4245910  | 1.9009090  | -0.0000400 | H                                                                                                                          | -1.7923430 | 2.0914510  | -0.0033090 |
| H                                                                                                                          | 3.2891470  | -0.4265420 | -0.0000280 | H                                                                                                                          | -1.3675880 | -2.1879420 | -0.0045830 |
| H                                                                                                                          | 1.7150660  | -2.3469810 | 0.0000030  | H                                                                                                                          | 1.1065550  | -1.9390470 | -0.0013820 |
| H                                                                                                                          | -0.7486770 | -1.9290460 | 0.0000560  | C                                                                                                                          | -3.2560810 | -0.2238560 | 0.0031130  |
| Molecule 3c                                                                                                                |            |            |            | Molecule 3d                                                                                                                |            |            |            |
| E = -460.10567052, H (0K) = -459.962661,<br>H (298K) = -459.952859, G (298K) = -459.996700 au.<br>Imaginary frequency = 0. |            |            |            | E = -805.17408590, H (0K) = -805.073532,<br>H (298K) = -805.065104, G (298K) = -805.106292 au.<br>Imaginary frequency = 0. |            |            |            |
| O                                                                                                                          | -3.7857230 | -0.3285060 | -0.0005420 | O                                                                                                                          | 3.6912570  | -0.5981790 | 0.0000290  |
| C                                                                                                                          | -2.8992490 | 0.5149870  | -0.0000670 | C                                                                                                                          | 2.9127720  | 0.3413380  | -0.0000180 |
| C                                                                                                                          | -1.4601170 | 0.2293570  | 0.0001320  | C                                                                                                                          | 1.4413650  | 0.2117740  | -0.0000130 |
| C                                                                                                                          | -0.5377720 | 1.2839690  | 0.0002730  | C                                                                                                                          | 0.8371320  | -1.0552530 | -0.0000150 |
| C                                                                                                                          | 0.8339630  | 1.0426670  | 0.0003390  | C                                                                                                                          | -0.5471090 | -1.1743420 | -0.0000070 |
| C                                                                                                                          | 1.2961320  | -0.2830050 | 0.0002480  | C                                                                                                                          | -1.3237970 | -0.0104770 | 0.0000020  |
| C                                                                                                                          | 0.3757920  | -1.3524160 | 0.0002120  | C                                                                                                                          | -0.7474560 | 1.2604140  | 0.0000010  |

<sup>1</sup> (a) Becke, A. D. *J. Chem. Phys.* **1993**, *98*, 5648–5652. (b) Becke, A. D. *Phys. Rev. A* **1988**, *38*, 3098–3100. (c) Lee, C.; Yang, W.; Parr, R. G. *Phys. Rev. B* **1988**, *37*, 785–789.

<sup>2</sup> Gaussian 09, Revision D.01, M. J. Frisch, G. W. Trucks, H. B. Schlegel, G. E. Scuseria, M. A. Robb, J. R. Cheeseman, G. Scalmani, V. Barone, B. Mennucci, G. A. Petersson, H. Nakatsuji, M. Caricato, X. Li, H. P. Hratchian, A. F. Izmaylov, J. Bloino, G. Zheng, J. L. Sonnenberg, M. Hada, M. Ehara, K. Toyota, R. Fukuda, J. Hasegawa, M. Ishida, T. Nakajima, Y. Honda, O. Kitao, H. Nakai, T. Vreven, J. A. Montgomery, Jr., J. E. Peralta, F. Ogliaro, M. Bearpark, J. J. Heyd, E. Brothers, K. N. Kudin, V. N. Staroverov, T. Keith, R. Kobayashi, J. Normand, K. Raghavachari, A. Rendell, J. C. Burant, S. S. Iyengar, J. Tomasi, M. Cossi, N. Rega, J. M. Millam, M. Klene, J. E. Knox, J. B. Cross, V. Bakken, C. Adamo, J. Jaramillo, R. Gomperts, R. E. Stratmann, O. Yazyev, A. J. Austin, R. Cammi, C. Pomelli, J. W. Ochterski, R. L. Martin, K. Morokuma, V. G. Zakrzewski, G. A. Voth, P. Salvador, J. J. Dannenberg, S. Dapprich, A. D. Daniels, O. Farkas, J. B. Foresman, J. V. Ortiz, J. Cioslowski, and D. J. Fox, Gaussian, Inc., Wallingford CT, **2013**.

<sup>3</sup> J. Tomasi, B. Mennucci, and R. Cammi, *Chem. Rev.*, **2005**, *105*, 2999–3093.



|                                                            |            |            |            |                                                            |            |            |            |
|------------------------------------------------------------|------------|------------|------------|------------------------------------------------------------|------------|------------|------------|
| C                                                          | -0.9819920 | -1.0966390 | 0.0001380  | C                                                          | 0.6420420  | 1.3629370  | -0.0000050 |
| H                                                          | -3.1552410 | 1.5963270  | 0.0001350  | H                                                          | 3.2876260  | 1.3861720  | 0.0000160  |
| H                                                          | -0.8982050 | 2.3103600  | 0.0004110  | H                                                          | 1.4675980  | -1.9387300 | -0.0000230 |
| H                                                          | 1.5268360  | 1.8752780  | 0.0005850  | H                                                          | -1.0238230 | -2.1483660 | -0.0000100 |
| H                                                          | 0.7622430  | -2.3668020 | 0.0001700  | H                                                          | -1.3728380 | 2.1460760  | 0.0000060  |
| H                                                          | -1.6988560 | -1.9120850 | -0.0000140 | H                                                          | 1.1081540  | 2.3450400  | -0.0000020 |
| O                                                          | 2.6022380  | -0.6399770 | 0.0003430  | Cl                                                         | -3.0756740 | -0.1543000 | 0.0000070  |
| C                                                          | 3.5963090  | 0.3863110  | -0.0007200 |                                                            |            |            |            |
| H                                                          | 3.5197070  | 1.0129900  | 0.8950560  |                                                            |            |            |            |
| H                                                          | 4.5552760  | -0.1326130 | -0.0017910 |                                                            |            |            |            |
| H                                                          | 3.5177180  | 1.0130330  | -0.8962830 |                                                            |            |            |            |
| <b>Molecule 3e</b>                                         |            |            |            | <b>Molecule 12</b>                                         |            |            |            |
| <b>E = -437.82265207, H (0K) = -437.713889,</b>            |            |            |            | <b>E = -833.76699090, H (0K) = -833.523656,</b>            |            |            |            |
| <b>H (298K) = -437.704852, G (298K) = -437.747183 au</b>   |            |            |            | <b>H (298K) = -833.507267, G (298K) = -833.567102 au</b>   |            |            |            |
| Imaginary frequency = 0.                                   |            |            |            | Imaginary frequency = 0.                                   |            |            |            |
| O                                                          | 3.5658890  | -0.6076260 | 0.0000270  | C                                                          | -0.0260250 | 0.3501370  | 0.0466900  |
| C                                                          | 2.7957800  | 0.3364080  | -0.0000150 | C                                                          | 1.5606280  | 2.2140670  | 0.1843330  |
| C                                                          | 1.3184360  | 0.2078190  | -0.0000130 | N                                                          | 0.2616460  | 1.6499850  | 0.2175630  |
| C                                                          | 0.7186370  | -1.0611080 | -0.0000150 | C                                                          | -0.7644380 | 2.6022220  | 0.7211930  |
| C                                                          | -0.6638230 | -1.1784190 | -0.0000060 | F                                                          | 2.2755380  | 1.6461500  | -0.8484620 |
| C                                                          | -1.4577190 | -0.0147220 | 0.0000020  | F                                                          | 1.4425200  | 3.5570750  | -0.1473130 |
| C                                                          | -0.8635750 | 1.2586750  | 0.0000000  | C                                                          | 1.0008370  | -0.7065710 | -0.0408210 |
| C                                                          | 0.5239610  | 1.3621490  | -0.0000060 | C                                                          | 0.7367590  | -1.8706080 | -0.7910130 |
| H                                                          | 3.1739050  | 1.3790910  | 0.0000280  | C                                                          | 1.6361410  | -2.9351970 | -0.8025050 |
| H                                                          | 1.3518650  | -1.9421170 | -0.0000250 | C                                                          | 2.8058580  | -2.8763840 | -0.0424570 |
| H                                                          | -1.1374440 | -2.1542240 | -0.0000090 | C                                                          | 3.0724030  | -1.7343180 | 0.7205530  |
| H                                                          | -1.4860600 | 2.1466840  | 0.0000030  | C                                                          | 2.1961390  | -0.6545220 | 0.7070080  |
| H                                                          | 0.9935120  | 2.3421060  | -0.0000010 | C                                                          | -1.4486110 | -0.0821980 | 0.0477800  |
| C                                                          | -2.8874540 | -0.1311530 | 0.0000060  | C                                                          | -1.8864340 | -1.0953590 | 0.9207780  |
| N                                                          | -4.0469070 | -0.2269190 | 0.0000100  | C                                                          | -3.2130330 | -1.5219290 | 0.9051210  |
|                                                            |            |            |            | C                                                          | -4.1222820 | -0.9584180 | 0.0052500  |
|                                                            |            |            |            | C                                                          | -3.6970970 | 0.0358860  | -0.8786180 |
|                                                            |            |            |            | C                                                          | -2.3722780 | 0.4711530  | -0.8579660 |
|                                                            |            |            |            | H                                                          | -0.2943430 | 3.2377550  | 1.4696290  |
|                                                            |            |            |            | H                                                          | -1.5897310 | 2.0560170  | 1.1673290  |
|                                                            |            |            |            | H                                                          | -1.1214170 | 3.2256810  | -0.1000350 |
|                                                            |            |            |            | H                                                          | -0.1765950 | -1.9352200 | -1.3734180 |
|                                                            |            |            |            | H                                                          | 1.4184230  | -3.8133260 | -1.4042600 |
|                                                            |            |            |            | H                                                          | 3.5066080  | -3.7066030 | -0.0487900 |
|                                                            |            |            |            | H                                                          | 3.9772110  | -1.6796440 | 1.3200090  |
|                                                            |            |            |            | H                                                          | 2.4263340  | 0.2369420  | 1.2815660  |
|                                                            |            |            |            | H                                                          | -1.1826880 | -1.5378940 | 1.6190870  |
|                                                            |            |            |            | H                                                          | -3.5375620 | -2.2949110 | 1.5960310  |
|                                                            |            |            |            | H                                                          | -5.1545050 | -1.2966840 | -0.0103000 |
|                                                            |            |            |            | H                                                          | -4.3942770 | 0.4689080  | -1.5903170 |
|                                                            |            |            |            | H                                                          | -2.0429130 | 1.2322980  | -1.5594480 |
| <b>TS<sup>1</sup> 3a+12</b>                                |            |            |            | <b>TS<sup>1</sup> 3b+12</b>                                |            |            |            |
| <b>E = -1179.35834055, H (0K) = -1179.003458,</b>          |            |            |            | <b>E = -1218.67730386, H (0K) = -1218.294293,</b>          |            |            |            |
| <b>H (298K) = -1178.979905, G (298K) = -1179.058322 au</b> |            |            |            | <b>H (298K) = -1218.269292, G (298K) = -1218.350645 au</b> |            |            |            |
| Imaginary frequency = 1.                                   |            |            |            | Imaginary frequency = 1.                                   |            |            |            |
| C                                                          | 1.4505190  | 0.0798930  | 0.4667350  | C                                                          | 1.6827090  | 0.1469950  | 0.4505920  |
| O                                                          | -1.1055360 | -2.0879110 | -1.0394350 | O                                                          | -0.8123390 | -2.7251490 | 0.2098610  |
| C                                                          | -1.9499740 | -1.8553490 | -0.1680100 | C                                                          | -1.6074340 | -1.9850450 | 0.8289420  |
| C                                                          | -0.9203220 | -0.0182350 | 1.1486430  | C                                                          | -0.5184900 | -0.1340040 | 1.5293250  |
| N                                                          | 0.4549330  | -0.3811080 | 1.2452440  | N                                                          | 0.8829800  | -0.3920580 | 1.3846990  |
| C                                                          | 0.6379820  | -1.5817870 | 2.0896460  | C                                                          | 1.2912390  | -1.5833910 | 2.1641760  |
| F                                                          | -1.4585390 | 0.2334150  | 2.3860960  | F                                                          | -0.8466390 | 0.0639430  | 2.8473610  |
| F                                                          | -1.1317180 | 1.0835450  | 0.3954460  | F                                                          | -0.9248130 | 0.9651700  | 0.8573520  |
| C                                                          | -3.1840390 | -1.0609150 | -0.4092640 | C                                                          | -2.7157910 | -1.2544530 | 0.1405840  |

|                                                         |            |            |            |                                                         |            |            |            |
|---------------------------------------------------------|------------|------------|------------|---------------------------------------------------------|------------|------------|------------|
| C                                                       | -4.1855790 | -1.0034440 | 0.5702350  | C                                                       | -3.7280670 | -0.6288070 | 0.8802430  |
| C                                                       | -5.3584400 | -0.2866120 | 0.3364840  | C                                                       | -4.7771170 | 0.0236050  | 0.2365440  |
| C                                                       | -5.5368550 | 0.3796500  | -0.8798480 | C                                                       | -4.8477120 | 0.0692720  | -1.1643390 |
| C                                                       | -4.5402690 | 0.3254710  | -1.8610510 | C                                                       | -3.8285880 | -0.5583610 | -1.8980630 |
| C                                                       | -3.3695880 | -0.3921830 | -1.6278110 | C                                                       | -2.7795260 | -1.2135320 | -1.2579960 |
| C                                                       | 1.5116010  | 1.4969230  | 0.0930300  | C                                                       | 1.5802730  | 1.5695900  | 0.1076180  |
| C                                                       | 2.0747860  | 1.8886420  | -1.1396180 | C                                                       | 1.8594720  | 2.0148950  | -1.2010520 |
| C                                                       | 2.1806090  | 3.2344280  | -1.4776660 | C                                                       | 1.8109640  | 3.3699970  | -1.5142370 |
| C                                                       | 1.7362670  | 4.2201420  | -0.5905790 | C                                                       | 1.4955940  | 4.3090300  | -0.5272190 |
| C                                                       | 1.1827240  | 3.8490870  | 0.6376760  | C                                                       | 1.2248440  | 3.8838830  | 0.7764520  |
| C                                                       | 1.0679710  | 2.5039770  | 0.9771320  | C                                                       | 1.2623470  | 2.5292750  | 1.0924210  |
| C                                                       | 2.5229090  | -0.8391840 | 0.0289000  | C                                                       | 2.6965580  | -0.6939520 | -0.2143970 |
| C                                                       | 3.8739550  | -0.4628560 | 0.1611500  | C                                                       | 4.0160640  | -0.2282240 | -0.3762060 |
| C                                                       | 4.8930630  | -1.3238740 | -0.2405890 | C                                                       | 4.9719830  | -1.0188120 | -1.0096190 |
| C                                                       | 4.5829900  | -2.5702450 | -0.7918080 | C                                                       | 4.6245460  | -2.2794650 | -1.5037560 |
| C                                                       | 3.2456810  | -2.9474830 | -0.9424630 | C                                                       | 3.3145190  | -2.7455070 | -1.3610090 |
| C                                                       | 2.2207490  | -2.0935060 | -0.5385520 | C                                                       | 2.3533110  | -1.9641780 | -0.7226940 |
| H                                                       | -1.9541220 | -2.4184210 | 0.7852780  | H                                                       | -1.7948800 | -2.1514060 | 1.9087300  |
| H                                                       | 0.0178320  | -1.4519050 | 2.9766940  | H                                                       | 0.9414520  | -1.4316010 | 3.1863930  |
| H                                                       | 1.6847080  | -1.6511510 | 2.3801020  | H                                                       | 2.3765590  | -1.6556900 | 2.1565240  |
| H                                                       | 0.3360810  | -2.4881190 | 1.5634550  | H                                                       | 0.8355990  | -2.4803400 | 1.7418060  |
| H                                                       | -4.0384190 | -1.5203250 | 1.5161920  | H                                                       | -3.6844130 | -0.6467910 | 1.9675690  |
| H                                                       | -6.1323190 | -0.2466660 | 1.0982200  | H                                                       | -5.5535820 | 0.5060130  | 0.8263170  |
| H                                                       | -6.4504320 | 0.9386610  | -1.0638300 | H                                                       | -3.8629770 | -0.5329650 | -2.9853110 |
| H                                                       | -4.6809790 | 0.8428850  | -2.8063640 | H                                                       | -1.9987720 | -1.7073870 | -1.8289230 |
| H                                                       | -2.5870850 | -0.4509820 | -2.3781490 | H                                                       | 2.0948560  | 1.2898580  | -1.9731550 |
| H                                                       | 2.4122590  | 1.1284760  | -1.8365540 | H                                                       | 2.0157170  | 3.6948280  | -2.5302690 |
| H                                                       | 2.6063750  | 3.5158790  | -2.4366270 | H                                                       | 1.4658690  | 5.3670230  | -0.7719130 |
| H                                                       | 1.8256890  | 5.2704990  | -0.8532110 | H                                                       | 0.9895000  | 4.6098940  | 1.5493020  |
| H                                                       | 0.8450640  | 4.6097510  | 1.3358890  | H                                                       | 1.0730360  | 2.2049390  | 2.1107700  |
| H                                                       | 0.6598060  | 2.2234750  | 1.9429040  | H                                                       | 4.2905720  | 0.7469720  | 0.0139200  |
| H                                                       | 4.1195990  | 0.5014620  | 0.5955160  | H                                                       | 5.9888790  | -0.6519390 | -1.1161360 |
| H                                                       | 5.9299840  | -1.0225120 | -0.1208340 | H                                                       | 5.3694930  | -2.8923280 | -2.0035020 |
| H                                                       | 5.3781470  | -3.2394310 | -1.1085180 | H                                                       | 3.0364810  | -3.7176340 | -1.7585230 |
| H                                                       | 2.9982530  | -3.9068080 | -1.3889030 | H                                                       | 1.3281550  | -2.3133650 | -0.6326800 |
| H                                                       | 1.1812090  | -2.3716070 | -0.6905970 | C                                                       | -6.0017000 | 0.7500670  | -1.8621810 |
|                                                         |            |            |            | H                                                       | -5.7022400 | 1.1448570  | -2.8387510 |
|                                                         |            |            |            | H                                                       | -6.8297090 | 0.0494070  | -2.0358160 |
|                                                         |            |            |            | H                                                       | -6.3986670 | 1.5779730  | -1.2653190 |
| <b>TS<sup>1</sup> 3c+12</b>                             |            |            |            | <b>TS<sup>1</sup> 3d+12</b>                             |            |            |            |
| <b>E = -1293.88391515, H (0K) = -1293.495681,</b>       |            |            |            | <b>E = -1638.95593182, H (0K) = -1638.610273,</b>       |            |            |            |
| <b>H (298K) = -1293.469961, G (298K) = -1293.552749</b> |            |            |            | <b>H (298K) = -1638.585814, G (298K) = -1638.666238</b> |            |            |            |
| au                                                      |            |            |            | au                                                      |            |            |            |
| Imaginary frequency = 1.                                |            |            |            | Imaginary frequency = 1.                                |            |            |            |
| C                                                       | 1.9642660  | 0.1793180  | 0.4373630  | C                                                       | 1.9152030  | 0.1783200  | 0.4239220  |
| O                                                       | -0.3797280 | -2.7660580 | 0.1423950  | O                                                       | -0.4818930 | -2.9121650 | 0.4706320  |
| C                                                       | -1.1900660 | -2.0921430 | 0.8217950  | C                                                       | -1.2715930 | -2.1747290 | 1.0862780  |
| C                                                       | -0.2001800 | -0.2485190 | 1.5411570  | C                                                       | -0.1231330 | -0.2164320 | 1.7577070  |
| N                                                       | 1.2117840  | -0.4251610 | 1.3704930  | N                                                       | 1.2536340  | -0.4191600 | 1.4291820  |
| C                                                       | 1.6941640  | -1.6158980 | 2.1072270  | C                                                       | 1.8032960  | -1.6049900 | 2.1267350  |
| F                                                       | -0.5168060 | -0.0990320 | 2.8682420  | F                                                       | -0.2909660 | -0.0728800 | 3.1126090  |
| F                                                       | -0.6741500 | 0.8431550  | 0.9022580  | F                                                       | -0.6521600 | 0.8858680  | 1.1806580  |
| C                                                       | -2.3699140 | -1.4167580 | 0.2009670  | C                                                       | -2.3704520 | -1.4308260 | 0.4024550  |
| C                                                       | -3.4030620 | -0.9035290 | 0.9912260  | C                                                       | -3.3624550 | -0.7802960 | 1.1482160  |
| C                                                       | -4.5231780 | -0.2966560 | 0.4212320  | C                                                       | -4.4128860 | -0.1182050 | 0.5167810  |
| C                                                       | -4.6150320 | -0.1969060 | -0.9743560 | C                                                       | -4.4604140 | -0.1129810 | -0.8780020 |
| C                                                       | -3.5831020 | -0.7112350 | -1.7794390 | C                                                       | -3.4874060 | -0.7554320 | -1.6455470 |
| C                                                       | -2.4784880 | -1.3128430 | -1.1950710 | C                                                       | -2.4465550 | -1.4148250 | -0.9964280 |
| C                                                       | 1.7811740  | 1.6024230  | 0.1320310  | C                                                       | 1.7228100  | 1.6058070  | 0.1468450  |
| C                                                       | 2.0172350  | 2.0928870  | -1.1688460 | C                                                       | 1.8248570  | 2.1039140  | -1.1687040 |
| C                                                       | 1.8937800  | 3.4507450  | -1.4476090 | C                                                       | 1.6927030  | 3.4655350  | -1.4241460 |

|                                                         |            |            |            |                                                         |            |            |            |
|---------------------------------------------------------|------------|------------|------------|---------------------------------------------------------|------------|------------|------------|
| C                                                       | 1.5453660  | 4.3478530  | -0.4331560 | C                                                       | 1.4668040  | 4.3596910  | -0.3729370 |
| C                                                       | 1.3165020  | 3.8778820  | 0.8632000  | C                                                       | 1.3701390  | 3.8824790  | 0.9371170  |
| C                                                       | 1.4286630  | 2.5198720  | 1.1448950  | C                                                       | 1.4928710  | 2.5208020  | 1.1966290  |
| C                                                       | 3.0122930  | -0.5875970 | -0.2632380 | C                                                       | 2.8567580  | -0.6087930 | -0.3947140 |
| C                                                       | 4.3031310  | -0.0484230 | -0.4280360 | C                                                       | 4.1255360  | -0.0921060 | -0.7234060 |
| C                                                       | 5.2901080  | -0.7700390 | -1.0952600 | C                                                       | 5.0110490  | -0.8325350 | -1.5028860 |
| C                                                       | 5.0017560  | -2.0327540 | -1.6211080 | C                                                       | 4.6423940  | -2.0944940 | -1.9780560 |
| C                                                       | 3.7198500  | -2.5707530 | -1.4756850 | C                                                       | 3.3814480  | -2.6118900 | -1.6688730 |
| C                                                       | 2.7282800  | -1.8592550 | -0.8031530 | C                                                       | 2.4916920  | -1.8802110 | -0.8847050 |
| H                                                       | -1.3382070 | -2.3245300 | 1.8963710  | H                                                       | -1.4153380 | -2.2903220 | 2.1770720  |
| H                                                       | 1.3495880  | -1.5155230 | 3.1374970  | H                                                       | 1.5965510  | -1.4731610 | 3.1900330  |
| H                                                       | 2.7816490  | -1.6288170 | 2.0852740  | H                                                       | 2.8783620  | -1.6416960 | 1.9658910  |
| H                                                       | 1.2815930  | -2.5218790 | 1.6600880  | H                                                       | 1.3221880  | -2.5144090 | 1.7641020  |
| H                                                       | -3.3316750 | -0.9738390 | 2.0748450  | H                                                       | -3.3101130 | -0.7880340 | 2.2345050  |
| H                                                       | -5.3081020 | 0.0881460  | 1.0619550  | H                                                       | -5.1818170 | 0.3846010  | 1.0934720  |
| H                                                       | -3.6772010 | -0.6287180 | -2.8583550 | H                                                       | -3.5488530 | -0.7419870 | -2.7286420 |
| H                                                       | -1.6824780 | -1.7230040 | -1.8092930 | H                                                       | -1.6831470 | -1.9336700 | -1.5675070 |
| H                                                       | 2.2785500  | 1.3997090  | -1.9615270 | H                                                       | 1.9899340  | 1.4137740  | -1.9894810 |
| H                                                       | 2.0659800  | 3.8102410  | -2.4579700 | H                                                       | 1.7617970  | 3.8303990  | -2.4448770 |
| H                                                       | 1.4573820  | 5.4084790  | -0.6509310 | H                                                       | 1.3712410  | 5.4230640  | -0.5734420 |
| H                                                       | 1.0558770  | 4.5718980  | 1.6570330  | H                                                       | 1.2045790  | 4.5734720  | 1.7586690  |
| H                                                       | 1.2717950  | 2.1613250  | 2.1572370  | H                                                       | 1.4399000  | 2.1571450  | 2.2179060  |
| H                                                       | 4.5317830  | 0.9289360  | -0.0144210 | H                                                       | 4.4184870  | 0.8839070  | -0.3490390 |
| H                                                       | 6.2849200  | -0.3475170 | -1.2040050 | H                                                       | 5.9904940  | -0.4256190 | -1.7377730 |
| H                                                       | 5.7705660  | -2.5913000 | -2.1476650 | H                                                       | 5.3317890  | -2.6682260 | -2.5910810 |
| H                                                       | 3.4873220  | -3.5445090 | -1.8976820 | H                                                       | 3.0843520  | -3.5852940 | -2.0491330 |
| H                                                       | 1.7234180  | -2.2624080 | -0.7090490 | H                                                       | 1.5024940  | -2.2731670 | -0.6658540 |
| O                                                       | -5.6584190 | 0.3728830  | -1.6426660 | Cl                                                      | -5.7859430 | 0.7209970  | -1.6905430 |
| C                                                       | -6.7337410 | 0.9150940  | -0.8815660 |                                                         |            |            |            |
| H                                                       | -7.4423550 | 1.3142070  | -1.6088310 |                                                         |            |            |            |
| H                                                       | -7.2269890 | 0.1428360  | -0.2787280 |                                                         |            |            |            |
| H                                                       | -6.3909520 | 1.7240980  | -0.2250460 |                                                         |            |            |            |
| <b>TS<sup>1</sup> 3e+12</b>                             |            |            |            | <b>Molecule 13a</b>                                     |            |            |            |
| <b>E = -1271.60685357, H (0K) = -1271.253066,</b>       |            |            |            | <b>E = -1179.43731943, H (0K) = -1179.077362,</b>       |            |            |            |
| <b>H (298K) = -1271.227938, G (298K) = -1271.309189</b> |            |            |            | <b>H (298K) = -1179.055040, G (298K) = -1179.130281</b> |            |            |            |
| au                                                      |            |            |            | au                                                      |            |            |            |
| Imaginary frequency = 1.                                |            |            |            | Imaginary frequency = 0.                                |            |            |            |
| C                                                       | 1.8049930  | 0.1824970  | 0.4294550  | C                                                       | 0.8422810  | 0.0822200  | 0.0696020  |
| O                                                       | -0.6512340 | -2.9772630 | 0.4615090  | O                                                       | -0.3290400 | -0.0112390 | -0.7584420 |
| C                                                       | -1.4490720 | -2.2379430 | 1.0521200  | C                                                       | -1.2938910 | -0.8759800 | -0.1506640 |
| C                                                       | -0.2584710 | -0.1761840 | 1.7339610  | C                                                       | -0.9102020 | -0.8629980 | 1.3465430  |
| N                                                       | 1.1171540  | -0.4047540 | 1.4238380  | N                                                       | 0.2830710  | -0.1506800 | 1.4157610  |
| C                                                       | 1.6413880  | -1.5914890 | 2.1391230  | C                                                       | 1.0915200  | -0.2476420 | 2.6217290  |
| F                                                       | -0.4406830 | -0.0003950 | 3.0830930  | F                                                       | -0.8104590 | -2.1664850 | 1.8210170  |
| F                                                       | -0.7706980 | 0.9167510  | 1.1244420  | F                                                       | -1.8748540 | -0.3097760 | 2.1656660  |
| C                                                       | -2.5033890 | -1.4567430 | 0.3425810  | C                                                       | -2.6959140 | -0.4175280 | -0.4681420 |
| C                                                       | -3.4917140 | -0.7771510 | 1.0695910  | C                                                       | -3.6881330 | -1.3628000 | -0.7474450 |
| C                                                       | -4.5010740 | -0.0839560 | 0.4140590  | C                                                       | -4.9972040 | -0.9561350 | -1.0158190 |
| C                                                       | -4.5282250 | -0.0660150 | -0.9929660 | C                                                       | -5.3194840 | 0.4019640  | -1.0158480 |
| C                                                       | -3.5414540 | -0.7484920 | -1.7291720 | C                                                       | -4.3288760 | 1.3508660  | -0.7447400 |
| C                                                       | -2.5409260 | -1.4403820 | -1.0594530 | C                                                       | -3.0241060 | 0.9439690  | -0.4691280 |
| C                                                       | 1.6370410  | 1.6124950  | 0.1508100  | C                                                       | 1.3604360  | 1.5183540  | -0.0788220 |
| C                                                       | 1.7711560  | 2.1112530  | -1.1616570 | C                                                       | 2.3133800  | 1.8450180  | -1.0511290 |
| C                                                       | 1.6603940  | 3.4746350  | -1.4178620 | C                                                       | 2.7085780  | 3.1711500  | -1.2396800 |
| C                                                       | 1.4230620  | 4.3701460  | -0.3703610 | C                                                       | 2.1585620  | 4.1861610  | -0.4550250 |
| C                                                       | 1.2936470  | 3.8923700  | 0.9366170  | C                                                       | 1.2027780  | 3.8687420  | 0.5132110  |
| C                                                       | 1.3958550  | 2.5291310  | 1.1969260  | C                                                       | 0.8027770  | 2.5447730  | 0.6956930  |
| C                                                       | 2.7426160  | -0.6217470 | -0.3762210 | C                                                       | 1.8807030  | -0.9803580 | -0.3363210 |
| C                                                       | 4.0218910  | -0.1255490 | -0.6962470 | C                                                       | 3.1261780  | -1.0464180 | 0.3084940  |
| C                                                       | 4.9034690  | -0.8829860 | -1.4636680 | C                                                       | 4.0542950  | -2.0312190 | -0.0308740 |
| C                                                       | 4.5214520  | -2.1424290 | -1.9350960 | C                                                       | 3.7600510  | -2.9603690 | -1.0316460 |

|                                                         |            |            |            |                                                         |            |            |            |
|---------------------------------------------------------|------------|------------|------------|---------------------------------------------------------|------------|------------|------------|
| C                                                       | 3.2506340  | -2.6400620 | -1.6344610 | C                                                       | 2.5363410  | -2.8861930 | -1.6972040 |
| C                                                       | 2.3648130  | -1.8908690 | -0.8625790 | C                                                       | 1.6063670  | -1.9010490 | -1.3548870 |
| H                                                       | -1.5944540 | -2.3162410 | 2.1448330  | H                                                       | -1.1521710 | -1.9078960 | -0.4950370 |
| H                                                       | 1.4100630  | -1.4533550 | 3.1966070  | H                                                       | 0.4207310  | -0.2045230 | 3.4835900  |
| H                                                       | 2.7199510  | -1.6353660 | 2.0048550  | H                                                       | 1.7672460  | 0.6097140  | 2.6770240  |
| H                                                       | 1.1660940  | -2.5021550 | 1.7727230  | H                                                       | 1.6780770  | -1.1729430 | 2.6751210  |
| H                                                       | -3.4627450 | -0.7900040 | 2.1561850  | H                                                       | -3.4371920 | -2.4208200 | -0.7578530 |
| H                                                       | -5.2664910 | 0.4413580  | 0.9756120  | H                                                       | -5.7596620 | -1.6992270 | -1.2325420 |
| H                                                       | -3.5724770 | -0.7333200 | -2.8138100 | H                                                       | -6.3355770 | 0.7213170  | -1.2310780 |
| H                                                       | -1.7790460 | -1.9833620 | -1.6089780 | H                                                       | -4.5739710 | 2.4095260  | -0.7484420 |
| H                                                       | 1.9450210  | 1.4204020  | -1.9800000 | H                                                       | -2.2514740 | 1.6790160  | -0.2673670 |
| H                                                       | 1.7547570  | 3.8398030  | -2.4364550 | H                                                       | 2.7479830  | 1.0641360  | -1.6663990 |
| H                                                       | 1.3438640  | 5.4347880  | -0.5712030 | H                                                       | 3.4482540  | 3.4082360  | -1.9994970 |
| H                                                       | 1.1188060  | 4.5841830  | 1.7555610  | H                                                       | 2.4710500  | 5.2171040  | -0.5973830 |
| H                                                       | 1.3176830  | 2.1657170  | 2.2168070  | H                                                       | 0.7667260  | 4.6523070  | 1.1270040  |
| H                                                       | 4.3253380  | 0.8482420  | -0.3245670 | H                                                       | 0.0540280  | 2.2969360  | 1.4411110  |
| H                                                       | 5.8906620  | -0.4913040 | -1.6919420 | H                                                       | 3.3870520  | -0.3140940 | 1.0661740  |
| H                                                       | 5.2083090  | -2.7293770 | -2.5383370 | H                                                       | 5.0115210  | -2.0656660 | 0.4822640  |
| H                                                       | 2.9429170  | -3.6113050 | -2.0116920 | H                                                       | 4.4837080  | -3.7260200 | -1.2973000 |
| H                                                       | 1.3687530  | -2.2705180 | -0.6523980 | H                                                       | 2.3028280  | -3.5901300 | -2.4914580 |
| C                                                       | -5.5656320 | 0.6456640  | -1.6779180 | H                                                       | 0.6708520  | -1.8331250 | -1.8982620 |
| N                                                       | -6.4085000 | 1.2241180  | -2.2351510 |                                                         |            |            |            |
| <b>Molecule 13b</b>                                     |            |            |            | <b>Molecule 13c</b>                                     |            |            |            |
| <b>E = -1218.75559623, H (0K) = -1218.368167,</b>       |            |            |            | <b>E = -1293.96192460, H (0K) = -1293.569279,</b>       |            |            |            |
| <b>H (298K) = -1218.343951, G (298K) = -1218.424038</b> |            |            |            | <b>H (298K) = -1293.544393, G (298K) = -1293.625900</b> |            |            |            |
| au                                                      |            |            |            | au                                                      |            |            |            |
| Imaginary frequency = 0.                                |            |            |            | Imaginary frequency = 0.                                |            |            |            |
| C                                                       | 1.1366190  | 0.0973970  | 0.0695110  | C                                                       | 1.4047940  | 0.1003710  | 0.0545380  |
| O                                                       | -0.0718370 | -0.0441370 | -0.6952270 | O                                                       | 0.2043330  | -0.0763100 | -0.7165170 |
| C                                                       | -0.9615270 | -0.9601000 | -0.0472410 | C                                                       | -0.6800200 | -1.0057430 | -0.0759610 |
| C                                                       | -0.5003260 | -0.9394980 | 1.4276230  | C                                                       | -0.1422130 | -1.0918570 | 1.3715830  |
| N                                                       | 0.6646460  | -0.1790320 | 1.4406570  | N                                                       | 0.9444930  | -0.2192910 | 1.4214610  |
| C                                                       | 1.5410070  | -0.2525960 | 2.5997190  | C                                                       | 1.8532910  | -0.3198650 | 2.5561330  |
| F                                                       | -0.3220130 | -2.2404650 | 1.8860670  | F                                                       | 0.1914500  | -2.4112110 | 1.6710700  |
| F                                                       | -1.4428100 | -0.4316720 | 2.3008930  | F                                                       | -1.0758100 | -0.7810620 | 2.3343720  |
| C                                                       | -2.3975210 | -0.5709170 | -0.2902690 | C                                                       | -2.1125570 | -0.5589740 | -0.2132960 |
| C                                                       | -3.3546840 | -1.5568190 | -0.5423660 | C                                                       | -3.1097590 | -1.4838790 | -0.5228480 |
| C                                                       | -4.6941890 | -1.2135640 | -0.7375180 | C                                                       | -4.4507700 | -1.1025720 | -0.6298290 |
| C                                                       | -5.1091420 | 0.1226290  | -0.6984020 | C                                                       | -4.8016090 | 0.2378590  | -0.4324000 |
| C                                                       | -4.1386300 | 1.1065870  | -0.4495670 | C                                                       | -3.8025040 | 1.1795720  | -0.1303400 |
| C                                                       | -2.8034840 | 0.7690910  | -0.2465910 | C                                                       | -2.4779520 | 0.7828220  | -0.0206520 |
| C                                                       | 1.5744060  | 1.5593960  | -0.0850840 | C                                                       | 1.7889100  | 1.5792210  | -0.0774600 |
| C                                                       | 2.4597540  | 1.9454690  | -1.0985410 | C                                                       | 2.5793820  | 2.0150630  | -1.1485790 |
| C                                                       | 2.7777870  | 3.2921950  | -1.2876960 | C                                                       | 2.8521230  | 3.3729540  | -1.3231980 |
| C                                                       | 2.2171430  | 4.2687510  | -0.4628330 | C                                                       | 2.3429740  | 4.3128160  | -0.4247820 |
| C                                                       | 1.3282170  | 3.8917820  | 0.5468920  | C                                                       | 1.5500500  | 3.8866830  | 0.6429180  |
| C                                                       | 1.0053700  | 2.5470890  | 0.7304620  | C                                                       | 1.2695710  | 2.5297280  | 0.8110990  |
| C                                                       | 2.2017450  | -0.9075830 | -0.4075080 | C                                                       | 2.5116060  | -0.8508620 | -0.4379420 |
| C                                                       | 3.4816960  | -0.9219620 | 0.1694230  | C                                                       | 3.8084680  | -0.7732870 | 0.0940810  |
| C                                                       | 4.4362860  | -1.8557990 | -0.2344630 | C                                                       | 4.8035940  | -1.6603900 | -0.3173490 |
| C                                                       | 4.1333590  | -2.7846940 | -1.2328680 | C                                                       | 4.5235890  | -2.6336110 | -1.2795210 |
| C                                                       | 2.8734190  | -2.7612740 | -1.8311250 | C                                                       | 3.2447740  | -2.7026690 | -1.8327830 |
| C                                                       | 1.9171750  | -1.8271490 | -1.4242650 | C                                                       | 2.2481020  | -1.8159280 | -1.4174170 |
| H                                                       | -0.7873500 | -1.9815390 | -0.4080140 | H                                                       | -0.5615400 | -2.0048940 | -0.5124880 |
| H                                                       | 0.9169680  | -0.2496680 | 3.4970640  | H                                                       | 1.2505330  | -0.4016440 | 3.4640450  |
| H                                                       | 2.1803300  | 0.6335420  | 2.6308890  | H                                                       | 2.4496980  | 0.5931050  | 2.6260090  |
| H                                                       | 2.1701650  | -1.1510770 | 2.6086770  | H                                                       | 2.5248200  | -1.1847320 | 2.4954060  |
| H                                                       | -3.0555420 | -2.6016140 | -0.5854780 | H                                                       | -2.8463850 | -2.5261820 | -0.6869870 |
| H                                                       | -5.4241070 | -1.9962220 | -0.9302060 | H                                                       | -5.1985230 | -1.8481730 | -0.8730000 |
| H                                                       | -4.4362210 | 2.1522860  | -0.4134270 | H                                                       | -4.0914300 | 2.2164490  | 0.0124530  |
| H                                                       | -2.0676850 | 1.5459650  | -0.0635000 | H                                                       | -1.7123720 | 1.5196540  | 0.2019140  |

|                                                                                                                                                              |            |            |            |                                                                                                                                                              |            |            |            |
|--------------------------------------------------------------------------------------------------------------------------------------------------------------|------------|------------|------------|--------------------------------------------------------------------------------------------------------------------------------------------------------------|------------|------------|------------|
| H                                                                                                                                                            | 2.9017850  | 1.1950070  | -1.7455950 | H                                                                                                                                                            | 2.9820810  | 1.2929660  | -1.8515530 |
| H                                                                                                                                                            | 3.4656160  | 3.5754470  | -2.0797350 | H                                                                                                                                                            | 3.4648610  | 3.6944060  | -2.1609930 |
| H                                                                                                                                                            | 2.4695690  | 5.3159070  | -0.6060520 | H                                                                                                                                                            | 2.5613060  | 5.3690840  | -0.5564820 |
| H                                                                                                                                                            | 0.8843140  | 4.6449430  | 1.1923250  | H                                                                                                                                                            | 1.1468070  | 4.6103160  | 1.3462110  |
| H                                                                                                                                                            | 0.3080850  | 2.2527360  | 1.5081810  | H                                                                                                                                                            | 0.6437070  | 2.1998020  | 1.6336980  |
| H                                                                                                                                                            | 3.7471970  | -0.1879390 | 0.9237590  | H                                                                                                                                                            | 4.0527390  | -0.0037440 | 0.8200350  |
| H                                                                                                                                                            | 5.4202950  | -1.8506350 | 0.2265130  | H                                                                                                                                                            | 5.8002880  | -1.5838860 | 0.1087020  |
| H                                                                                                                                                            | 4.8774860  | -3.5106260 | -1.5487650 | H                                                                                                                                                            | 5.2990120  | -3.3226560 | -1.6027060 |
| H                                                                                                                                                            | 2.6313750  | -3.4652640 | -2.6227830 | H                                                                                                                                                            | 3.0192460  | -3.4424860 | -2.5961570 |
| H                                                                                                                                                            | 0.9511640  | -1.7981350 | -1.9151990 | H                                                                                                                                                            | 1.2663130  | -1.8596020 | -1.8745080 |
| C                                                                                                                                                            | -6.5509720 | 0.5032080  | -0.9412060 | O                                                                                                                                                            | -6.0705060 | 0.7287700  | -0.5164680 |
| H                                                                                                                                                            | -6.8796980 | 1.2860280  | -0.2485210 | C                                                                                                                                                            | -7.1267220 | -0.1785040 | -0.8194080 |
| H                                                                                                                                                            | -6.6919300 | 0.8938230  | -1.9576220 | H                                                                                                                                                            | -7.2132250 | -0.9608650 | -0.0556130 |
| H                                                                                                                                                            | -7.2172780 | -0.3572460 | -0.8244510 | H                                                                                                                                                            | -8.0390920 | 0.4194910  | -0.8307080 |
|                                                                                                                                                              |            |            |            | H                                                                                                                                                            | -6.9843990 | -0.6442860 | -1.8021400 |
| <b>Molecule 13d</b>                                                                                                                                          |            |            |            | <b>Molecule 13e</b>                                                                                                                                          |            |            |            |
| <b>E</b> = -1639.03365226, <b>H (0K)</b> = -1638.683434,<br><b>H (298K)</b> = -1638.659813, <b>G (298K)</b> = -1638.738768<br>au<br>Imaginary frequency = 0. |            |            |            | <b>E</b> = -1271.68468178, <b>H (0K)</b> = -1271.325961,<br><b>H (298K)</b> = -1271.301963, <b>G (298K)</b> = -1271.380546<br>au<br>Imaginary frequency = 0. |            |            |            |
| C                                                                                                                                                            | 1.4168170  | 0.0981500  | 0.0697900  | C                                                                                                                                                            | 1.2370230  | 0.1209460  | 0.0376110  |
| O                                                                                                                                                            | 0.1867960  | -0.0535430 | -0.6613760 | O                                                                                                                                                            | 0.1594830  | -0.1755180 | -0.8774240 |
| C                                                                                                                                                            | -0.6648150 | -0.9882140 | 0.0027820  | C                                                                                                                                                            | -0.6990700 | -1.1897360 | -0.3637620 |
| C                                                                                                                                                            | -0.1803280 | -0.9527920 | 1.4695220  | C                                                                                                                                                            | -0.1726690 | -1.4442290 | 1.0674990  |
| N                                                                                                                                                            | 0.9899640  | -0.2039230 | 1.4498760  | N                                                                                                                                                            | 0.7141370  | -0.3954290 | 1.3188170  |
| C                                                                                                                                                            | 1.8938390  | -0.2660540 | 2.5878200  | C                                                                                                                                                            | 1.5554400  | -0.4931080 | 2.5079620  |
| F                                                                                                                                                            | -0.0097410 | -2.2465370 | 1.9450650  | F                                                                                                                                                            | 0.4204280  | -2.7029610 | 1.1316320  |
| F                                                                                                                                                            | -1.1082760 | -0.4210060 | 2.3467290  | F                                                                                                                                                            | -1.1588960 | -1.5073690 | 2.0184150  |
| C                                                                                                                                                            | -2.1157350 | -0.6314930 | -0.2063930 | C                                                                                                                                                            | -2.1531990 | -0.7683790 | -0.4209790 |
| C                                                                                                                                                            | -3.0696930 | -1.6471100 | -0.3206490 | C                                                                                                                                                            | -3.1486480 | -1.7541550 | -0.4251400 |
| C                                                                                                                                                            | -4.4227910 | -1.3440140 | -0.4781720 | C                                                                                                                                                            | -4.4935520 | -1.4035250 | -0.4519830 |
| C                                                                                                                                                            | -4.8091050 | -0.0065990 | -0.5304310 | C                                                                                                                                                            | -4.8551140 | -0.0455160 | -0.4845440 |
| C                                                                                                                                                            | -3.8753870 | 1.0247360  | -0.4281140 | C                                                                                                                                                            | -3.8606860 | 0.9468190  | -0.4899760 |
| C                                                                                                                                                            | -2.5292990 | 0.7041350  | -0.2623850 | C                                                                                                                                                            | -2.5183030 | 0.5812650  | -0.4576450 |
| C                                                                                                                                                            | 1.8252690  | 1.5689850  | -0.0780510 | C                                                                                                                                                            | 1.3850310  | 1.6460880  | 0.0590870  |
| C                                                                                                                                                            | 2.6910710  | 1.9827070  | -1.0973160 | C                                                                                                                                                            | 2.1357480  | 2.2920110  | -0.9324640 |
| C                                                                                                                                                            | 2.9808060  | 3.3374880  | -1.2748010 | C                                                                                                                                                            | 2.2029270  | 3.6850400  | -0.9771140 |
| C                                                                                                                                                            | 2.4106330  | 4.2938590  | -0.4331260 | C                                                                                                                                                            | 1.5255750  | 4.4515240  | -0.0261360 |
| C                                                                                                                                                            | 1.5405190  | 3.8889900  | 0.5823000  | C                                                                                                                                                            | 0.7711180  | 3.8156600  | 0.9616610  |
| C                                                                                                                                                            | 1.2463460  | 2.5364640  | 0.7548940  | C                                                                                                                                                            | 0.6949510  | 2.4218540  | 0.9993090  |
| C                                                                                                                                                            | 2.4805100  | -0.8851330 | -0.4515260 | C                                                                                                                                                            | 2.5217680  | -0.5989350 | -0.4109500 |
| C                                                                                                                                                            | 3.7740230  | -0.8951870 | 0.0943950  | C                                                                                                                                                            | 3.7510220  | -0.3061900 | 0.2000290  |
| C                                                                                                                                                            | 4.7288920  | -1.8101590 | -0.3500010 | C                                                                                                                                                            | 4.9097080  | -0.9943210 | -0.1615660 |
| C                                                                                                                                                            | 4.4122990  | -2.7236210 | -1.3583320 | C                                                                                                                                                            | 4.8614690  | -1.9798510 | -1.1500420 |
| C                                                                                                                                                            | 3.1380790  | -2.7039170 | -1.9255520 | C                                                                                                                                                            | 3.6476820  | -2.2645440 | -1.7766170 |
| C                                                                                                                                                            | 2.1814290  | -1.7889290 | -1.4782400 | C                                                                                                                                                            | 2.4873040  | -1.5786300 | -1.4103920 |
| H                                                                                                                                                            | -0.4758170 | -2.0064170 | -0.3599160 | H                                                                                                                                                            | -0.5660490 | -2.1169560 | -0.9338200 |
| H                                                                                                                                                            | 1.2916820  | -0.2746080 | 3.4998900  | H                                                                                                                                                            | 0.9193600  | -0.7905380 | 3.3448880  |
| H                                                                                                                                                            | 2.5202570  | 0.6296910  | 2.6062780  | H                                                                                                                                                            | 1.9776940  | 0.4889410  | 2.7328340  |
| H                                                                                                                                                            | 2.5366180  | -1.1548100 | 2.5791680  | H                                                                                                                                                            | 2.3692350  | -1.2194330 | 2.3997180  |
| H                                                                                                                                                            | -2.7603400 | -2.6885720 | -0.2882100 | H                                                                                                                                                            | -2.8718400 | -2.8048110 | -0.4088290 |
| H                                                                                                                                                            | -5.1604130 | -2.1341030 | -0.5670100 | H                                                                                                                                                            | -5.2620470 | -2.1692100 | -0.4548620 |
| H                                                                                                                                                            | -4.1952260 | 2.0600790  | -0.4764140 | H                                                                                                                                                            | -4.1429790 | 1.9940220  | -0.5207070 |
| H                                                                                                                                                            | -1.7924360 | 1.4968550  | -0.1897510 | H                                                                                                                                                            | -1.7477410 | 1.3434230  | -0.4713090 |
| H                                                                                                                                                            | 3.1401090  | 1.2483600  | -1.7578150 | H                                                                                                                                                            | 2.6680420  | 1.7051940  | -1.6742290 |
| H                                                                                                                                                            | 3.6540850  | 3.6426950  | -2.0711270 | H                                                                                                                                                            | 2.7871350  | 4.1702120  | -1.7541840 |
| H                                                                                                                                                            | 2.6411540  | 5.3471760  | -0.5675910 | H                                                                                                                                                            | 1.5841740  | 5.5360810  | -0.0560580 |
| H                                                                                                                                                            | 1.0895110  | 4.6263750  | 1.2408280  | H                                                                                                                                                            | 0.2382250  | 4.4030440  | 1.7044430  |
| H                                                                                                                                                            | 0.5643170  | 2.2199120  | 1.5374940  | H                                                                                                                                                            | 0.0954350  | 1.9297230  | 1.7577470  |
| H                                                                                                                                                            | 4.0497040  | -0.1726390 | 0.8560490  | H                                                                                                                                                            | 3.8115110  | 0.4750510  | 0.9518620  |
| H                                                                                                                                                            | 5.7235950  | -1.8021420 | 0.0872670  | H                                                                                                                                                            | 5.8509530  | -0.7530080 | 0.3246920  |

|                                                                                                      |            |            |            |                                                                                                      |            |            |            |
|------------------------------------------------------------------------------------------------------|------------|------------|------------|------------------------------------------------------------------------------------------------------|------------|------------|------------|
| H                                                                                                    | 5.1566420  | -3.4347210 | -1.7057950 | H                                                                                                    | 5.7640600  | -2.5129980 | -1.4355980 |
| H                                                                                                    | 2.8848670  | -3.3958610 | -2.7242650 | H                                                                                                    | 3.6003700  | -3.0178020 | -2.5584000 |
| H                                                                                                    | 1.2034480  | -1.7627920 | -1.9450950 | H                                                                                                    | 1.5556530  | -1.7910840 | -1.9219990 |
| Cl                                                                                                   | -6.5149410 | 0.3920860  | -0.7393380 | C                                                                                                    | -6.2389910 | 0.3262170  | -0.5197660 |
|                                                                                                      |            |            |            | N                                                                                                    | -7.3627130 | 0.6282030  | -0.5476310 |
| <b>TS<sup>2</sup> 3a+12</b>                                                                          |            |            |            | <b>TS<sup>2</sup> 3b+12</b>                                                                          |            |            |            |
| E = -1179.36067279, H (0K) = -1179.005366,<br>H (298K) = -1178.982071, G (298K) = -1179.059140<br>au |            |            |            | E = -1218.67898664, H (0K) = -1218.296142,<br>H (298K) = -1218.271016, G (298K) = -1218.353089<br>au |            |            |            |
| Imaginary frequency = 1.                                                                             |            |            |            | Imaginary frequency = 1.                                                                             |            |            |            |
| C                                                                                                    | -1.5053190 | 0.0003260  | 0.3926800  | C                                                                                                    | -1.8136580 | 0.0214160  | 0.3954620  |
| O                                                                                                    | 1.5901260  | -2.0942290 | -0.8333360 | O                                                                                                    | 1.1660600  | -2.1468120 | -0.8290150 |
| C                                                                                                    | 2.0045890  | -0.9389920 | -1.0172040 | C                                                                                                    | 1.6080560  | -0.9955610 | -1.0065550 |
| C                                                                                                    | 0.8962040  | 0.5575870  | 0.5150280  | C                                                                                                    | 0.6105240  | 0.4738740  | 0.5024470  |
| N                                                                                                    | -0.2770730 | -0.1465220 | 0.9190990  | N                                                                                                    | -0.5910200 | -0.1780390 | 0.9161850  |
| C                                                                                                    | 0.0760760  | -1.2929490 | 1.7861940  | C                                                                                                    | -0.2800360 | -1.3421870 | 1.7760390  |
| F                                                                                                    | 0.6434110  | 1.6378790  | -0.2645180 | F                                                                                                    | 0.3987310  | 1.5814820  | -0.2496320 |
| F                                                                                                    | 1.6016900  | 1.0071030  | 1.5975720  | F                                                                                                    | 1.3553900  | 0.8630500  | 1.5803980  |
| C                                                                                                    | 3.3773610  | -0.4993670 | -0.6369340 | C                                                                                                    | 3.0086480  | -0.6110670 | -0.6667900 |
| C                                                                                                    | 3.8465030  | 0.7665460  | -1.0178640 | C                                                                                                    | 3.5255080  | 0.6324180  | -1.0570120 |
| C                                                                                                    | 5.1447200  | 1.1620770  | -0.6994240 | C                                                                                                    | 4.8452720  | 0.9724240  | -0.7694410 |
| C                                                                                                    | 5.9869450  | 0.2934020  | 0.0018990  | C                                                                                                    | 5.6891330  | 0.0813670  | -0.0887400 |
| C                                                                                                    | 5.5260590  | -0.9719730 | 0.3812640  | C                                                                                                    | 5.1636990  | -1.1617240 | 0.2990740  |
| C                                                                                                    | 4.2287950  | -1.3675720 | 0.0613760  | C                                                                                                    | 3.8457880  | -1.5066470 | 0.0124910  |
| C                                                                                                    | -2.3444790 | -1.1893510 | 0.1536490  | C                                                                                                    | -2.7046310 | -1.1305990 | 0.1602310  |
| C                                                                                                    | -3.7130920 | -1.1781700 | 0.4895390  | C                                                                                                    | -4.0702650 | -1.0599080 | 0.5005210  |
| C                                                                                                    | -4.5093880 | -2.2969000 | 0.2571650  | C                                                                                                    | -4.9149800 | -2.1426810 | 0.2688500  |
| C                                                                                                    | -3.9588150 | -3.4430720 | -0.3239510 | C                                                                                                    | -4.4162160 | -3.3102700 | -0.3163950 |
| C                                                                                                    | -2.6053750 | -3.4620050 | -0.6713930 | C                                                                                                    | -3.0659470 | -3.3875540 | -0.6683820 |
| C                                                                                                    | -1.7998860 | -2.3487400 | -0.4374340 | C                                                                                                    | -2.2118890 | -2.3111400 | -0.4347320 |
| C                                                                                                    | -2.0147620 | 1.3371410  | 0.0645390  | C                                                                                                    | -2.2697830 | 1.3786350  | 0.0714740  |
| C                                                                                                    | -1.6770610 | 2.4541160  | 0.8584690  | C                                                                                                    | -1.8933900 | 2.4775960  | 0.8728190  |
| C                                                                                                    | -2.2039690 | 3.7114570  | 0.5777630  | C                                                                                                    | -2.3719580 | 3.7551510  | 0.5969410  |
| C                                                                                                    | -3.0734790 | 3.8842930  | -0.5025660 | C                                                                                                    | -3.2298260 | 3.9658030  | -0.4860060 |
| C                                                                                                    | -3.4161940 | 2.7879790  | -1.3002110 | C                                                                                                    | -3.6106400 | 2.8873500  | -1.2906720 |
| C                                                                                                    | -2.8971890 | 1.5274920  | -1.0191350 | C                                                                                                    | -3.1409170 | 1.6067450  | -1.0139060 |
| H                                                                                                    | 1.4856500  | -0.2647110 | -1.7236690 | H                                                                                                    | 1.1104510  | -0.3147030 | -1.7232910 |
| H                                                                                                    | 0.6695760  | -2.0203760 | 1.2299410  | H                                                                                                    | 0.3005660  | -2.0776660 | 1.2161770  |
| H                                                                                                    | -0.8370040 | -1.7457760 | 2.1655190  | H                                                                                                    | -1.2092650 | -1.7747060 | 2.1388870  |
| H                                                                                                    | 0.6625970  | -0.8967590 | 2.6168010  | H                                                                                                    | 0.3064830  | -0.9704970 | 2.6178750  |
| H                                                                                                    | 3.1845780  | 1.4409120  | -1.5564580 | H                                                                                                    | 2.8830750  | 1.3389770  | -1.5779280 |
| H                                                                                                    | 5.5015670  | 2.1442880  | -0.9973580 | H                                                                                                    | 5.2296040  | 1.9426280  | -1.0763210 |
| H                                                                                                    | 6.9997750  | 0.5999970  | 0.2491270  | H                                                                                                    | 5.8006880  | -1.8664070 | 0.8295050  |
| H                                                                                                    | 6.1822160  | -1.6490040 | 0.9219940  | H                                                                                                    | 3.4465010  | -2.4732770 | 0.3049220  |
| H                                                                                                    | 3.8578510  | -2.3501340 | 0.3371380  | H                                                                                                    | -4.4600980 | -0.1580660 | 0.9623440  |
| H                                                                                                    | -4.1433300 | -0.2933970 | 0.9485320  | H                                                                                                    | -5.9628300 | -2.0766030 | 0.5478500  |
| H                                                                                                    | -5.5600370 | -2.2756310 | 0.5327590  | H                                                                                                    | -5.0773590 | -4.1523790 | -0.5010320 |
| H                                                                                                    | -4.5821170 | -4.3135120 | -0.5087930 | H                                                                                                    | -2.6766450 | -4.2873600 | -1.1368160 |
| H                                                                                                    | -2.1754810 | -4.3448700 | -1.1365920 | H                                                                                                    | -1.1662590 | -2.3666330 | -0.7290540 |
| H                                                                                                    | -0.7524660 | -2.3612380 | -0.7294650 | H                                                                                                    | -1.2453660 | 2.3155610  | 1.7284770  |
| H                                                                                                    | -1.0197560 | 2.3213870  | 1.7121070  | H                                                                                                    | -2.0799600 | 4.5869970  | 1.2315460  |
| H                                                                                                    | -1.9405680 | 4.5569820  | 1.2068250  | H                                                                                                    | -3.6031210 | 4.9634530  | -0.6993320 |
| H                                                                                                    | -3.4848680 | 4.8660880  | -0.7193960 | H                                                                                                    | -4.2716960 | 3.0460090  | -2.1378920 |
| H                                                                                                    | -4.0858520 | 2.9171720  | -2.1457190 | H                                                                                                    | -3.4322610 | 0.7758770  | -1.6480560 |
| H                                                                                                    | -3.1591980 | 0.6832960  | -1.6484660 | C                                                                                                    | 7.1295850  | 0.4373390  | 0.1936260  |
|                                                                                                      |            |            |            | H                                                                                                    | 7.4870140  | -0.0387760 | 1.1127930  |
|                                                                                                      |            |            |            | H                                                                                                    | 7.7867390  | 0.1033310  | -0.6207380 |
|                                                                                                      |            |            |            | H                                                                                                    | 7.2628650  | 1.5195530  | 0.2939380  |
| <b>TS<sup>2</sup> 3c+12</b>                                                                          |            |            |            | <b>TS<sup>2</sup> 3d+12</b>                                                                          |            |            |            |
| E = -1293.88569622, H (0K) = -1293.497414,                                                           |            |            |            | E = -1638.95794907, H (0K) = -1638.612007,                                                           |            |            |            |

|                                                         |            |            |            |                                                         |            |            |            |
|---------------------------------------------------------|------------|------------|------------|---------------------------------------------------------|------------|------------|------------|
| <b>H (298K) = -1293.471696, G (298K) = -1293.554272</b> |            |            |            | <b>H (298K) = -1638.587714, G (298K) = -1638.667345</b> |            |            |            |
| au                                                      |            |            |            | au                                                      |            |            |            |
| Imaginary frequency = 1.                                |            |            |            | Imaginary frequency = 1.                                |            |            |            |
| C                                                       | -2.1127430 | 0.0044090  | 0.4061010  | C                                                       | -2.0931330 | 0.0269190  | 0.3953930  |
| O                                                       | 0.8574080  | -2.1004410 | -0.8424090 | O                                                       | 0.8040210  | -2.1389590 | -0.8356840 |
| C                                                       | 1.2683050  | -0.9327290 | -1.0181890 | C                                                       | 1.2439940  | -0.9751860 | -0.9827840 |
| C                                                       | 0.3102700  | 0.4667640  | 0.4905520  | C                                                       | 0.3455270  | 0.4128820  | 0.5018270  |
| N                                                       | -0.8849170 | -0.1915210 | 0.9154350  | N                                                       | -0.8798200 | -0.2102120 | 0.9146050  |
| C                                                       | -0.5584580 | -1.3608750 | 1.7625480  | C                                                       | -0.5952010 | -1.3980830 | 1.7517270  |
| F                                                       | 0.0856900  | 1.5927900  | -0.2292240 | F                                                       | 0.1609220  | 1.5585560  | -0.1975070 |
| F                                                       | 1.0783540  | 0.8264320  | 1.5612880  | F                                                       | 1.1128670  | 0.7296560  | 1.5860420  |
| C                                                       | 2.6762180  | -0.5319790 | -0.7337920 | C                                                       | 2.6717400  | -0.6328840 | -0.6765520 |
| C                                                       | 3.1656820  | 0.7247570  | -1.1301660 | C                                                       | 3.2156870  | 0.6009970  | -1.0586170 |
| C                                                       | 4.4855840  | 1.0816030  | -0.8965360 | C                                                       | 4.5518540  | 0.9038390  | -0.8032980 |
| C                                                       | 5.3549510  | 0.1813650  | -0.2559180 | C                                                       | 5.3444970  | -0.0462820 | -0.1583920 |
| C                                                       | 4.8818980  | -1.0778230 | 0.1428530  | C                                                       | 4.8301590  | -1.2841190 | 0.2296820  |
| C                                                       | 3.5523080  | -1.4203420 | -0.1013140 | C                                                       | 3.4927640  | -1.5695960 | -0.0361780 |
| C                                                       | -2.9995840 | -1.1507250 | 0.1713940  | C                                                       | -3.0221040 | -1.0953820 | 0.1637140  |
| C                                                       | -4.3634280 | -1.0884550 | 0.5202400  | C                                                       | -4.3823910 | -0.9809130 | 0.5118870  |
| C                                                       | -5.2040990 | -2.1740400 | 0.2870720  | C                                                       | -5.2618120 | -2.0352390 | 0.2783920  |
| C                                                       | -4.7029340 | -3.3353880 | -0.3084520 | C                                                       | -4.8028820 | -3.2128240 | -0.3191670 |
| C                                                       | -3.3543990 | -3.4039790 | -0.6690680 | C                                                       | -3.4580380 | -3.3312730 | -0.6809890 |
| C                                                       | -2.5040470 | -2.3250810 | -0.4337410 | C                                                       | -2.5683700 | -2.2855740 | -0.4428210 |
| C                                                       | -2.5807690 | 1.3608670  | 0.0954150  | C                                                       | -2.5154650 | 1.3961570  | 0.0739980  |
| C                                                       | -2.2130590 | 2.4549520  | 0.9072030  | C                                                       | -2.1338340 | 2.4788740  | 0.8938440  |
| C                                                       | -2.7036640 | 3.7307510  | 0.6446700  | C                                                       | -2.5863270 | 3.7666950  | 0.6225990  |
| C                                                       | -3.5648530 | 3.9441830  | -0.4351070 | C                                                       | -3.4194650 | 4.0016990  | -0.4746540 |
| C                                                       | -3.9374360 | 2.8703220  | -1.2497140 | C                                                       | -3.8050470 | 2.9383800  | -1.2969630 |
| C                                                       | -3.4562030 | 1.5912620  | -0.9859440 | C                                                       | -3.3652180 | 1.6467640  | -1.0227980 |
| H                                                       | 0.7455730  | -0.2669060 | -1.7325050 | H                                                       | 0.7722290  | -0.2959360 | -1.7195830 |
| H                                                       | 0.0375820  | -2.0772530 | 1.1936980  | H                                                       | -0.0133860 | -2.1231080 | 1.1787820  |
| H                                                       | -1.4816250 | -1.8146820 | 2.1142080  | H                                                       | -1.5337330 | -1.8308710 | 2.0882500  |
| H                                                       | 0.0169410  | -0.9900610 | 2.6123990  | H                                                       | -0.0183910 | -1.0526160 | 2.6109770  |
| H                                                       | 2.4975490  | 1.4286760  | -1.6209130 | H                                                       | 2.5868960  | 1.3350410  | -1.5563710 |
| H                                                       | 4.8713480  | 2.0497900  | -1.2013420 | H                                                       | 4.9729300  | 1.8583400  | -1.1007750 |
| H                                                       | 5.5367960  | -1.7895110 | 0.6323740  | H                                                       | 5.4671440  | -2.0100930 | 0.7241000  |
| H                                                       | 3.1784860  | -2.3969170 | 0.1915710  | H                                                       | 3.0688270  | -2.5297890 | 0.2404740  |
| H                                                       | -4.7548770 | -0.1913100 | 0.9897560  | H                                                       | -4.7404640 | -0.0701160 | 0.9816300  |
| H                                                       | -6.2505600 | -2.1150330 | 0.5727370  | H                                                       | -6.3053220 | -1.9388180 | 0.5641880  |
| H                                                       | -5.3610430 | -4.1796010 | -0.4943570 | H                                                       | -5.4916090 | -4.0319270 | -0.5062050 |
| H                                                       | -2.9637500 | -4.2990110 | -1.1454590 | H                                                       | -3.1012570 | -4.2391410 | -1.1593220 |
| H                                                       | -1.4593710 | -2.3724510 | -0.7337940 | H                                                       | -1.5258160 | -2.3691220 | -0.7419380 |
| H                                                       | -1.5627450 | 2.2900500  | 1.7605530  | H                                                       | -1.5044040 | 2.2964300  | 1.7590970  |
| H                                                       | -2.4184490 | 4.5589330  | 1.2870800  | H                                                       | -2.2929580 | 4.5873320  | 1.2708000  |
| H                                                       | -3.9472390 | 4.9405090  | -0.6382400 | H                                                       | -3.7710790 | 5.0077130  | -0.6852520 |
| H                                                       | -4.6012570 | 3.0313740  | -2.0942990 | H                                                       | -4.4478570 | 3.1170920  | -2.1539980 |
| H                                                       | -3.7413590 | 0.7638030  | -1.6273330 | H                                                       | -3.6614870 | 0.8260230  | -1.6677160 |
| O                                                       | 6.6315170  | 0.6220290  | -0.0730390 | Cl                                                      | 7.0400350  | 0.3233950  | 0.1670690  |
| C                                                       | 7.5626350  | -0.2457460 | 0.5680550  |                                                         |            |            |            |
| H                                                       | 8.5038950  | 0.3044180  | 0.6072690  |                                                         |            |            |            |
| H                                                       | 7.2424730  | -0.4930860 | 1.5874330  |                                                         |            |            |            |
| H                                                       | 7.7051840  | -1.1712380 | -0.0028460 |                                                         |            |            |            |
| <b>TS<sup>2</sup> 3e+12</b>                             |            |            |            | <b>Molecule 15a</b>                                     |            |            |            |
| <b>E = -1271.60814288, H (0K) = -1271.254324,</b>       |            |            |            | <b>E = -1179.37072020, H (0K) = -1179.013154,</b>       |            |            |            |
| <b>H (298K) = -1271.229163, G (298K) = -1271.310925</b> |            |            |            | <b>H (298K) = -1178.990502, G (298K) = -1179.065104</b> |            |            |            |
| au                                                      |            |            |            | au                                                      |            |            |            |
| Imaginary frequency = 1.                                |            |            |            | Imaginary frequency = 0.                                |            |            |            |
| C                                                       | -1.9744940 | 0.0396600  | 0.3951420  | C                                                       | -1.4360260 | -0.0010960 | 0.4730360  |
| O                                                       | 1.0109080  | -2.2236480 | -0.9561780 | O                                                       | 1.2683890  | -2.1202330 | -0.3010260 |
| C                                                       | 1.4685220  | -1.0910680 | -1.1544270 | C                                                       | 1.5302540  | -0.8241630 | -0.3589030 |
| C                                                       | 0.4494250  | 0.5144310  | 0.4226560  | C                                                       | 0.9924730  | 0.0091060  | 0.9278490  |

|                                                                                                                                   |            |            |            |                                                                                                                                  |            |            |            |
|-----------------------------------------------------------------------------------------------------------------------------------|------------|------------|------------|----------------------------------------------------------------------------------------------------------------------------------|------------|------------|------------|
| N                                                                                                                                 | -0.7337470 | -0.1494620 | 0.8732020  | N                                                                                                                                | -0.3970810 | -0.4165400 | 1.2044360  |
| C                                                                                                                                 | -0.3884430 | -1.3013360 | 1.7363850  | C                                                                                                                                | -0.4151470 | -1.6718610 | 1.9876570  |
| F                                                                                                                                 | 0.2033260  | 1.5821420  | -0.3765270 | F                                                                                                                                | 1.0648000  | 1.3419430  | 0.6889680  |
| F                                                                                                                                 | 1.1892970  | 0.9734330  | 1.4787420  | F                                                                                                                                | 1.7276800  | -0.2251240 | 2.0454680  |
| C                                                                                                                                 | 2.8534760  | -0.6992110 | -0.7604310 | C                                                                                                                                | 3.0223570  | -0.4564190 | -0.5115070 |
| C                                                                                                                                 | 3.3725000  | 0.5498360  | -1.1344530 | C                                                                                                                                | 3.4442440  | 0.7572310  | -1.0682500 |
| C                                                                                                                                 | 4.6753400  | 0.9007240  | -0.8054670 | C                                                                                                                                | 4.8051400  | 1.0396910  | -1.2128610 |
| C                                                                                                                                 | 5.4800460  | -0.0086090 | -0.0934110 | C                                                                                                                                | 5.7611130  | 0.1107660  | -0.7940710 |
| C                                                                                                                                 | 4.9675910  | -1.2652940 | 0.2802860  | C                                                                                                                                | 5.3468510  | -1.1036680 | -0.2376300 |
| C                                                                                                                                 | 3.6637120  | -1.6031300 | -0.0573980 | C                                                                                                                                | 3.9867500  | -1.3830680 | -0.1017410 |
| C                                                                                                                                 | -2.8687410 | -1.1181820 | 0.2056800  | C                                                                                                                                | -2.4556230 | -0.9678590 | 0.0354370  |
| C                                                                                                                                 | -4.2196580 | -1.0491630 | 0.6005830  | C                                                                                                                                | -3.8276520 | -0.6573070 | 0.0971390  |
| C                                                                                                                                 | -5.0683670 | -2.1375790 | 0.4147140  | C                                                                                                                                | -4.7691600 | -1.5665970 | -0.3766670 |
| C                                                                                                                                 | -4.5890960 | -3.3089140 | -0.1790940 | C                                                                                                                                | -4.3508970 | -2.7749340 | -0.9430470 |
| C                                                                                                                                 | -3.2542380 | -3.3846040 | -0.5857160 | C                                                                                                                                | -2.9882220 | -3.0785790 | -1.0289270 |
| C                                                                                                                                 | -2.3962060 | -2.3026680 | -0.3970580 | C                                                                                                                                | -2.0371030 | -2.1905840 | -0.5339600 |
| C                                                                                                                                 | -2.4455040 | 1.3914850  | 0.0723070  | C                                                                                                                                | -1.6155870 | 1.4159790  | 0.1290110  |
| C                                                                                                                                 | -2.0320000 | 2.5016800  | 0.8393740  | C                                                                                                                                | -1.3776620 | 2.4186630  | 1.0919450  |
| C                                                                                                                                 | -2.5230220 | 3.7750930  | 0.5670990  | C                                                                                                                                | -1.6442100 | 3.7517600  | 0.7967020  |
| C                                                                                                                                 | -3.4297970 | 3.9699090  | -0.4783930 | C                                                                                                                                | -2.1337330 | 4.1069790  | -0.4635110 |
| C                                                                                                                                 | -3.8468550 | 2.8803590  | -1.2493910 | C                                                                                                                                | -2.3737940 | 3.1213050  | -1.4262070 |
| C                                                                                                                                 | -3.3647780 | 1.6037050  | -0.9759090 | C                                                                                                                                | -2.1335580 | 1.7835980  | -1.1294870 |
| H                                                                                                                                 | 0.9717790  | -0.3933330 | -1.8519980 | H                                                                                                                                | 0.9623250  | -0.2582260 | -1.1514000 |
| H                                                                                                                                 | 0.1415440  | -2.0635200 | 1.1633500  | H                                                                                                                                | 0.2407330  | -2.3873890 | 1.4790730  |
| H                                                                                                                                 | -1.3001050 | -1.7068730 | 2.1691540  | H                                                                                                                                | -1.4357000 | -2.0373820 | 2.0620770  |
| H                                                                                                                                 | 0.2578330  | -0.9224750 | 2.5298650  | H                                                                                                                                | -0.0293100 | -1.4368090 | 2.9806760  |
| H                                                                                                                                 | 2.7437990  | 1.2512290  | -1.6763700 | H                                                                                                                                | 2.7048700  | 1.4832090  | -1.3987420 |
| H                                                                                                                                 | 5.0770040  | 1.8668460  | -1.0927420 | H                                                                                                                                | 5.1186510  | 1.9821520  | -1.6555900 |
| H                                                                                                                                 | 5.5960390  | -1.9627090 | 0.8246440  | H                                                                                                                                | 6.8203220  | 0.3280580  | -0.9071050 |
| H                                                                                                                                 | 3.2541340  | -2.5713580 | 0.2110380  | H                                                                                                                                | 6.0861110  | -1.8335190 | 0.0844560  |
| H                                                                                                                                 | -4.5940240 | -0.1442690 | 1.0690300  | H                                                                                                                                | 3.6394540  | -2.3287480 | 0.3027000  |
| H                                                                                                                                 | -6.1040990 | -2.0726970 | 0.7357970  | H                                                                                                                                | -4.1486450 | 0.2828610  | 0.5342360  |
| H                                                                                                                                 | -5.2535820 | -4.1553330 | -0.3282630 | H                                                                                                                                | -5.8273210 | -1.3325770 | -0.3091690 |
| H                                                                                                                                 | -2.8805380 | -4.2871890 | -1.0612410 | H                                                                                                                                | -5.0875380 | -3.4778000 | -1.3219280 |
| H                                                                                                                                 | -1.3646900 | -2.3599280 | -0.7352800 | H                                                                                                                                | -2.6667000 | -4.0097130 | -1.4864330 |
| H                                                                                                                                 | -1.3442660 | 2.3520130  | 1.6657730  | H                                                                                                                                | -0.9681060 | -2.4000640 | -0.6082960 |
| H                                                                                                                                 | -2.2024570 | 4.6160850  | 1.1751960  | H                                                                                                                                | -1.0166910 | 2.1399720  | 2.0759940  |
| H                                                                                                                                 | -3.8128450 | 4.9644630  | -0.6887290 | H                                                                                                                                | -1.4732310 | 4.5141280  | 1.5507110  |
| H                                                                                                                                 | -4.5459000 | 3.0272510  | -2.0676650 | H                                                                                                                                | -2.3346400 | 5.1494860  | -0.6928820 |
| H                                                                                                                                 | -3.6845270 | 0.7639340  | -1.5840220 | H                                                                                                                                | -2.7513600 | 3.3960050  | -2.4064170 |
| C                                                                                                                                 | 6.8253670  | 0.3445690  | 0.2486620  | H                                                                                                                                | -2.3179380 | 1.0189770  | -1.8767640 |
| N                                                                                                                                 | 7.9187970  | 0.6318470  | 0.5270130  |                                                                                                                                  |            |            |            |
| <b>Molecule 15b</b>                                                                                                               |            |            |            | <b>Molecule 15c</b>                                                                                                              |            |            |            |
| <b>E</b> = -1218.68850177, <b>H (0K)</b> = -1218.303531,<br><b>H (298K)</b> = -1218.278970, <b>G (298K)</b> = -1218.358562<br>au. |            |            |            | <b>E</b> = -1293.89467182, <b>H (0K)</b> = -1293.504433,<br><b>H (298K)</b> = -1293.479172, <b>G (298K)</b> = -1293.559729<br>au |            |            |            |
| Imaginary frequency = 0.                                                                                                          |            |            |            | Imaginary frequency = 0.                                                                                                         |            |            |            |
| C                                                                                                                                 | -1.7622670 | 0.0109090  | 0.4624050  | C                                                                                                                                | -2.0698850 | -0.0087870 | 0.4601870  |
| O                                                                                                                                 | 0.9202600  | -2.1569350 | -0.2387430 | O                                                                                                                                | 0.6666880  | -2.1139120 | -0.2145110 |
| C                                                                                                                                 | 1.2085860  | -0.8657660 | -0.2814690 | C                                                                                                                                | 0.9239430  | -0.8162020 | -0.2616700 |
| C                                                                                                                                 | 0.6492280  | -0.0308250 | 0.9960640  | C                                                                                                                                | 0.3374140  | 0.0072470  | 1.0120050  |
| N                                                                                                                                 | -0.7567870 | -0.4288160 | 1.2258670  | N                                                                                                                                | -1.0604040 | -0.4221350 | 1.2332480  |
| C                                                                                                                                 | -0.8260630 | -1.6873400 | 2.0009900  | C                                                                                                                                | -1.1070510 | -1.6786670 | 2.0133330  |
| F                                                                                                                                 | 0.7566880  | 1.3021310  | 0.7713240  | F                                                                                                                                | 0.4157680  | 1.3424320  | 0.7865700  |
| F                                                                                                                                 | 1.3445700  | -0.2897030 | 2.1335260  | F                                                                                                                                | 1.0311170  | -0.2344950 | 2.1541490  |
| C                                                                                                                                 | 2.7092920  | -0.5253890 | -0.3906130 | C                                                                                                                                | 2.4141410  | -0.4381810 | -0.3664190 |
| C                                                                                                                                 | 3.1753520  | 0.6828530  | -0.9205540 | C                                                                                                                                | 2.8545370  | 0.7877080  | -0.8872880 |
| C                                                                                                                                 | 4.5448410  | 0.9386800  | -1.0199090 | C                                                                                                                                | 4.2108420  | 1.0814190  | -0.9854450 |
| C                                                                                                                                 | 5.4896470  | -0.0024840 | -0.5893500 | C                                                                                                                                | 5.1655760  | 0.1480430  | -0.5531630 |
| C                                                                                                                                 | 5.0150210  | -1.2108990 | -0.0559400 | C                                                                                                                                | 4.7424420  | -1.0817370 | -0.0316110 |
| C                                                                                                                                 | 3.6486790  | -1.4688980 | 0.0372800  | C                                                                                                                                | 3.3755910  | -1.3582680 | 0.0524110  |



|                                                         |            |            |            |                                                         |            |            |            |
|---------------------------------------------------------|------------|------------|------------|---------------------------------------------------------|------------|------------|------------|
| C                                                       | -2.7864850 | -0.9326420 | -0.0137220 | C                                                       | -3.0683210 | -0.9777080 | -0.0200430 |
| C                                                       | -4.1531120 | -0.5937900 | 0.0027330  | C                                                       | -4.4425070 | -0.6705600 | -0.0158720 |
| C                                                       | -5.0965820 | -1.4813140 | -0.5071060 | C                                                       | -5.3611310 | -1.5817800 | -0.5293390 |
| C                                                       | -4.6845240 | -2.6959680 | -1.0644930 | C                                                       | -4.9167140 | -2.7889490 | -1.0780350 |
| C                                                       | -3.3263290 | -3.0277000 | -1.1052290 | C                                                       | -3.5509450 | -3.0893780 | -1.1064160 |
| C                                                       | -2.3744670 | -2.1616300 | -0.5741010 | C                                                       | -2.6236550 | -2.1992570 | -0.5715500 |
| C                                                       | -1.9013920 | 1.4330930  | 0.1196290  | C                                                       | -2.2398610 | 1.4086930  | 0.1114740  |
| C                                                       | -1.6773780 | 2.4265830  | 1.0952570  | C                                                       | -2.0468850 | 2.4103060  | 1.0853940  |
| C                                                       | -1.9064210 | 3.7661530  | 0.7975800  | C                                                       | -2.3053030 | 3.7431710  | 0.7816200  |
| C                                                       | -2.3441250 | 4.1367650  | -0.4771480 | C                                                       | -2.7422060 | 4.0993790  | -0.4974660 |
| C                                                       | -2.5700230 | 3.1602790  | -1.4525490 | C                                                       | -2.9376430 | 3.1147030  | -1.4712210 |
| C                                                       | -2.3673060 | 1.8166930  | -1.1543160 | C                                                       | -2.7052470 | 1.7772530  | -1.1670860 |
| H                                                       | 0.6715230  | -0.2840490 | -1.0844980 | H                                                       | 0.3731350  | -0.2505270 | -1.0673930 |
| H                                                       | -0.1683070 | -2.4139380 | 1.5108640  | H                                                       | -0.4287430 | -2.3919300 | 1.5319930  |
| H                                                       | -1.8556970 | -2.0323780 | 2.0398720  | H                                                       | -2.1287170 | -2.0473170 | 2.0450490  |
| H                                                       | -0.4686840 | -1.4652020 | 3.0075640  | H                                                       | -0.7636180 | -1.4441470 | 3.0219720  |
| H                                                       | 2.4645150  | 1.4316580  | -1.2629140 | H                                                       | 2.1279870  | 1.5211820  | -1.2290350 |
| H                                                       | 4.8852990  | 1.8830870  | -1.4404650 | H                                                       | 4.5545740  | 2.0258950  | -1.3978200 |
| H                                                       | 5.7286910  | -1.9584980 | 0.2862550  | H                                                       | 5.4605060  | -1.8229930 | 0.3015010  |
| H                                                       | 3.2781790  | -2.4120840 | 0.4269180  | H                                                       | 3.0287740  | -2.3150410 | 0.4304850  |
| H                                                       | -4.4693010 | 0.3512170  | 0.4328620  | H                                                       | -4.7839080 | 0.2687380  | 0.4074400  |
| H                                                       | -6.1513420 | -1.2254230 | -0.4746700 | H                                                       | -6.4217550 | -1.3502020 | -0.5064890 |
| H                                                       | -5.4222950 | -3.3817130 | -1.4715240 | H                                                       | -5.6351780 | -3.4932890 | -1.4878520 |
| H                                                       | -3.0087040 | -3.9635620 | -1.5557820 | H                                                       | -3.2082110 | -4.0196060 | -1.5502200 |
| H                                                       | -1.3080650 | -2.3927150 | -0.6130940 | H                                                       | -1.5518910 | -2.4057080 | -0.6008560 |
| H                                                       | -1.3568890 | 2.1363400  | 2.0899360  | H                                                       | -1.7267980 | 2.1308250  | 2.0832740  |
| H                                                       | -1.7466240 | 4.5215900  | 1.5609800  | H                                                       | -2.1690080 | 4.5045590  | 1.5436760  |
| H                                                       | -2.5158160 | 5.1841100  | -0.7082070 | H                                                       | -2.9368640 | 5.1416410  | -0.7332740 |
| H                                                       | -2.9072510 | 3.4468130  | -2.4440310 | H                                                       | -3.2741850 | 3.3900180  | -2.4661160 |
| H                                                       | -2.5407150 | 1.0591930  | -1.9114200 | H                                                       | -2.8550110 | 1.0135240  | -1.9229920 |
| C                                                       | 6.9723160  | 0.2599040  | -0.7239490 | O                                                       | 6.4734470  | 0.5274390  | -0.6894210 |
| H                                                       | 7.5344250  | -0.1813390 | 0.1066780  | C                                                       | 7.4829630  | -0.3829610 | -0.2691970 |
| H                                                       | 7.3731920  | -0.1745050 | -1.6499110 | H                                                       | 8.4348140  | 0.1145570  | -0.4630190 |
| H                                                       | 7.1890460  | 1.3331320  | -0.7491300 | H                                                       | 7.4020860  | -0.6071800 | 0.8018540  |
|                                                         |            |            |            | H                                                       | 7.4412250  | -1.3206280 | -0.8375380 |
| <b>Molecule 15d</b>                                     |            |            |            | <b>Molecule 15e</b>                                     |            |            |            |
| <b>E = -1638.96863098, H (0K) = -1638.620758,</b>       |            |            |            | <b>E = -1271.62091455, H (0K) = -1271.264694</b>        |            |            |            |
| <b>H (298K) = -1638.596834, G (298K) = -1638.674942</b> |            |            |            | <b>H (298K) = -1271.240204, G (298K) = -1271.319361</b> |            |            |            |
| au.                                                     |            |            |            | au.                                                     |            |            |            |
| Imaginary frequency = 0.                                |            |            |            | Imaginary frequency = 0.                                |            |            |            |
| C                                                       | -2.0615770 | 0.0153640  | 0.4533970  | C                                                       | -1.9390650 | 0.0151110  | 0.4519910  |
| O                                                       | 0.6247330  | -2.1529750 | -0.2251450 | O                                                       | 0.7535970  | -2.1449550 | -0.2507170 |
| C                                                       | 0.9197850  | -0.8637620 | -0.2529550 | C                                                       | 1.0439670  | -0.8556680 | -0.2771940 |
| C                                                       | 0.3442090  | -0.0333550 | 1.0161300  | C                                                       | 0.4729680  | -0.0250490 | 0.9916860  |
| N                                                       | -1.0657380 | -0.4298380 | 1.2256210  | N                                                       | -0.9333940 | -0.4280750 | 1.2124130  |
| C                                                       | -1.1493840 | -1.6880790 | 2.0011120  | C                                                       | -1.0063750 | -1.6855610 | 1.9912160  |
| F                                                       | 0.4582060  | 1.3004840  | 0.7974650  | F                                                       | 0.5802310  | 1.3085350  | 0.7685030  |
| F                                                       | 1.0233350  | -0.2980880 | 2.1617420  | F                                                       | 1.1620110  | -0.2844280 | 2.1326010  |
| C                                                       | 2.4290170  | -0.5405020 | -0.3258780 | C                                                       | 2.5550860  | -0.5324040 | -0.3501960 |
| C                                                       | 2.9241030  | 0.6782580  | -0.8034840 | C                                                       | 3.0488200  | 0.6894640  | -0.8260550 |
| C                                                       | 4.2980470  | 0.9177840  | -0.8782870 | C                                                       | 4.4188970  | 0.9223040  | -0.9046970 |
| C                                                       | 5.1765760  | -0.0802380 | -0.4607370 | C                                                       | 5.3183150  | -0.0784020 | -0.4958950 |
| C                                                       | 4.7125310  | -1.3056180 | 0.0173630  | C                                                       | 4.8302250  | -1.3094500 | -0.0188290 |
| C                                                       | 3.3367760  | -1.5242740 | 0.0764970  | C                                                       | 3.4588540  | -1.5250990 | 0.0442940  |
| C                                                       | -3.0859200 | -0.9228090 | -0.0317510 | C                                                       | -2.9663030 | -0.9253660 | -0.0212140 |
| C                                                       | -4.4508040 | -0.5764620 | -0.0282480 | C                                                       | -4.3317530 | -0.5813990 | -0.0032810 |
| C                                                       | -5.3937660 | -1.4592980 | -0.5468510 | C                                                       | -5.2783860 | -1.4662820 | -0.5113870 |
| C                                                       | -4.9823700 | -2.6757620 | -1.1008400 | C                                                       | -4.8704180 | -2.6819920 | -1.0695620 |
| C                                                       | -3.6255620 | -3.0144750 | -1.1294160 | C                                                       | -3.5133460 | -3.0182210 | -1.1128140 |
| C                                                       | -2.6745610 | -2.1536510 | -0.5886480 | C                                                       | -2.5583980 | -2.1556190 | -0.5822330 |
| C                                                       | -2.1902430 | 1.4373920  | 0.1070270  | C                                                       | -2.0747840 | 1.4361960  | 0.1060820  |

|                                                         |            |            |            |                                                         |            |            |            |
|---------------------------------------------------------|------------|------------|------------|---------------------------------------------------------|------------|------------|------------|
| C                                                       | -1.9752200 | 2.4311980  | 1.0844410  | C                                                       | -1.8526000 | 2.4310580  | 1.0809770  |
| C                                                       | -2.1967890 | 3.7708880  | 0.7820800  | C                                                       | -2.0818770 | 3.7696980  | 0.7802050  |
| C                                                       | -2.6167870 | 4.1408380  | -0.4988300 | C                                                       | -2.5159330 | 4.1373610  | -0.4967330 |
| C                                                       | -2.8332670 | 3.1639560  | -1.4759760 | C                                                       | -2.7392460 | 3.1594440  | -1.4713140 |
| C                                                       | -2.6392410 | 1.8201520  | -1.1732850 | C                                                       | -2.5383430 | 1.8164260  | -1.1698670 |
| H                                                       | 0.4122020  | -0.2734840 | -1.0676940 | H                                                       | 0.5421680  | -0.2657900 | -1.0949420 |
| H                                                       | -0.4892280 | -2.4182010 | 1.5206550  | H                                                       | -0.3490370 | -2.4152300 | 1.5069550  |
| H                                                       | -2.1808400 | -2.0285340 | 2.0276200  | H                                                       | -2.0366910 | -2.0283570 | 2.0277250  |
| H                                                       | -0.8039380 | -1.4660520 | 3.0118170  | H                                                       | -0.6527240 | -1.4602210 | 2.9983170  |
| H                                                       | 2.2354070  | 1.4530610  | -1.1300430 | H                                                       | 2.3581530  | 1.4647840  | -1.1454020 |
| H                                                       | 4.6786480  | 1.8607430  | -1.2572600 | H                                                       | 4.7979900  | 1.8672830  | -1.2811540 |
| H                                                       | 5.4141100  | -2.0723350 | 0.3304250  | H                                                       | 5.5283060  | -2.0813260 | 0.2904800  |
| H                                                       | 2.9336990  | -2.4730730 | 0.4159960  | H                                                       | 3.0481290  | -2.4720110 | 0.3785840  |
| H                                                       | -4.7661100 | 0.3699330  | 0.3993820  | H                                                       | -4.6442800 | 0.3643130  | 0.4278110  |
| H                                                       | -6.4474950 | -1.1983730 | -0.5240880 | H                                                       | -6.3323090 | -1.2075500 | -0.4773220 |
| H                                                       | -5.7197180 | -3.3576430 | -1.5149880 | H                                                       | -5.6107960 | -3.3653610 | -1.4757060 |
| H                                                       | -3.3084980 | -3.9515500 | -1.5777020 | H                                                       | -3.1993270 | -3.9546240 | -1.5645220 |
| H                                                       | -1.6092320 | -2.3896770 | -0.6184400 | H                                                       | -1.4933060 | -2.3898060 | -0.6240000 |
| H                                                       | -1.6685390 | 2.1413640  | 2.0835600  | H                                                       | -1.5350900 | 2.1427840  | 2.0771500  |
| H                                                       | -2.0448970 | 4.5269290  | 1.5464280  | H                                                       | -1.9250560 | 4.5267120  | 1.5425390  |
| H                                                       | -2.7822960 | 5.1883660  | -0.7334290 | H                                                       | -2.6872230 | 5.1842100  | -0.7301340 |
| H                                                       | -3.1568970 | 3.4503260  | -2.4719770 | H                                                       | -3.0738880 | 3.4443760  | -2.4640420 |
| H                                                       | -2.8060010 | 1.0620130  | -1.9312110 | H                                                       | -2.7107110 | 1.0572540  | -1.9254730 |
| Cl                                                      | 6.9202800  | 0.2095320  | -0.5516050 | C                                                       | 6.7296120  | 0.1529610  | -0.5727300 |
|                                                         |            |            |            | N                                                       | 7.8772860  | 0.3415300  | -0.6332370 |
| <b>TS<sup>3</sup> (3a)</b>                              |            |            |            | <b>TS<sup>3</sup> (3b)</b>                              |            |            |            |
| <b>E = -1179.36537114, H (0K) = -1179.008280,</b>       |            |            |            | <b>E = -1218.68302367, H (0K) = -1218.298612,</b>       |            |            |            |
| <b>H (298K) = -1178.986131, G (298K) = -1179.059521</b> |            |            |            | <b>H (298K) = -1218.274483, G (298K) = -1218.353299</b> |            |            |            |
| au                                                      |            |            |            | au                                                      |            |            |            |
| Imaginary frequency = 1.                                |            |            |            | Imaginary frequency = 1.                                |            |            |            |
| C                                                       | -1.3646990 | -0.0289950 | 0.4805590  | C                                                       | -1.6891490 | -0.0400200 | 0.4726610  |
| O                                                       | 0.8404430  | -1.3494790 | -0.9830090 | O                                                       | 0.5693990  | -1.3150120 | -0.9370970 |
| C                                                       | 1.4437420  | -0.2675850 | -0.5164180 | C                                                       | 1.1421310  | -0.2210520 | -0.4585920 |
| C                                                       | 1.0252770  | 0.0695390  | 1.0145410  | C                                                       | 0.6841230  | 0.1076080  | 1.0628720  |
| N                                                       | -0.3610060 | -0.4328190 | 1.2497730  | N                                                       | -0.6971430 | -0.4209980 | 1.2681160  |
| C                                                       | -0.3786390 | -1.7684700 | 1.8848390  | C                                                       | -0.7037170 | -1.7556460 | 1.9053270  |
| F                                                       | 1.1208620  | 1.4000620  | 1.2837450  | F                                                       | 0.7476020  | 1.4399320  | 1.3336820  |
| F                                                       | 1.8157520  | -0.5451190 | 1.9332580  | F                                                       | 1.4657460  | -0.4912890 | 1.9993760  |
| C                                                       | 2.9908130  | -0.2980030 | -0.5244520 | C                                                       | 2.6880270  | -0.2217050 | -0.4353270 |
| C                                                       | 3.7614700  | 0.8623720  | -0.3781240 | C                                                       | 3.4393010  | 0.9470910  | -0.2638150 |
| C                                                       | 5.1564670  | 0.8000630  | -0.4195100 | C                                                       | 4.8346000  | 0.9066400  | -0.2746200 |
| C                                                       | 5.7977050  | -0.4275650 | -0.6085790 | C                                                       | 5.5225890  | -0.3012620 | -0.4605710 |
| C                                                       | 5.0334930  | -1.5884740 | -0.7596290 | C                                                       | 4.7624530  | -1.4672090 | -0.6321040 |
| C                                                       | 3.6396610  | -1.5199610 | -0.7197690 | C                                                       | 3.3679040  | -1.4266760 | -0.6234050 |
| C                                                       | -2.4712570 | -0.9401990 | 0.1168500  | C                                                       | -2.7704840 | -0.9735230 | 0.0891440  |
| C                                                       | -3.8018070 | -0.5741430 | 0.3875850  | C                                                       | -4.1128210 | -0.6351200 | 0.3360880  |
| C                                                       | -4.8442570 | -1.4196510 | 0.0147350  | C                                                       | -5.1305900 | -1.5025340 | -0.0544110 |
| C                                                       | -4.5702260 | -2.6094460 | -0.6659390 | C                                                       | -4.8197650 | -2.6867400 | -0.7289980 |
| C                                                       | -3.2506020 | -2.9574130 | -0.9701590 | C                                                       | -3.4879890 | -3.0071530 | -1.0095350 |
| C                                                       | -2.1975740 | -2.1347160 | -0.5775200 | C                                                       | -2.4595170 | -2.1622480 | -0.5991230 |
| C                                                       | -1.4942510 | 1.3711960  | 0.0367770  | C                                                       | -1.8346410 | 1.3553660  | 0.0184570  |
| C                                                       | -1.3625080 | 2.4378250  | 0.9464180  | C                                                       | -1.7467650 | 2.4288030  | 0.9252130  |
| C                                                       | -1.6028400 | 3.7441780  | 0.5278450  | C                                                       | -2.0015570 | 3.7281850  | 0.4934860  |
| C                                                       | -1.9531780 | 4.0033740  | -0.7993220 | C                                                       | -2.3229500 | 3.9738890  | -0.8435080 |
| C                                                       | -2.0884660 | 2.9490590  | -1.7084780 | C                                                       | -2.4146150 | 2.9125310  | -1.7499320 |
| C                                                       | -1.8855350 | 1.6383450  | -1.2896570 | C                                                       | -2.1970230 | 1.6081610  | -1.3188440 |
| H                                                       | 1.1527510  | 0.6973520  | -1.0142300 | H                                                       | 0.8417290  | 0.7377930  | -0.9626030 |
| H                                                       | 0.1738590  | -2.4614630 | 1.2467500  | H                                                       | -0.1258500 | -2.4393150 | 1.2796730  |
| H                                                       | -1.4085670 | -2.0928470 | 2.0049000  | H                                                       | -1.7298770 | -2.0985010 | 2.0046990  |
| H                                                       | 0.1001990  | -1.6878000 | 2.8590150  | H                                                       | -0.2465830 | -1.6650640 | 2.8889770  |
| H                                                       | 3.2681250  | 1.8213930  | -0.2343730 | H                                                       | 2.9316250  | 1.8985480  | -0.1186500 |

|                                                         |            |            |            |                                                         |            |            |            |
|---------------------------------------------------------|------------|------------|------------|---------------------------------------------------------|------------|------------|------------|
| H                                                       | 5.7427530  | 1.7093970  | -0.3091160 | H                                                       | 5.3993440  | 1.8274960  | -0.1397280 |
| H                                                       | 6.8831290  | -0.4771540 | -0.6459960 | H                                                       | 5.2725730  | -2.4178630 | -0.7792290 |
| H                                                       | 5.5259560  | -2.5459020 | -0.9150010 | H                                                       | 2.7713650  | -2.3211690 | -0.7746060 |
| H                                                       | 3.0191700  | -2.4005150 | -0.8551410 | H                                                       | -4.3517030 | 0.2907280  | 0.8504080  |
| H                                                       | -4.0120880 | 0.3561160  | 0.9063150  | H                                                       | -6.1650650 | -1.2498000 | 0.1579310  |
| H                                                       | -5.8692940 | -1.1455300 | 0.2454520  | H                                                       | -5.6165480 | -3.3535010 | -1.0463730 |
| H                                                       | -5.3862580 | -3.2590600 | -0.9696530 | H                                                       | -3.2502970 | -3.9143240 | -1.5574960 |
| H                                                       | -3.0416840 | -3.8687310 | -1.5229220 | H                                                       | -1.4168130 | -2.3532570 | -0.8364410 |
| H                                                       | -1.1637990 | -2.3478060 | -0.8340010 | H                                                       | -1.5083670 | 2.2370440  | 1.9647260  |
| H                                                       | -1.1018290 | 2.2358260  | 1.9786140  | H                                                       | -1.9492600 | 4.5488700  | 1.2025120  |
| H                                                       | -1.5167440 | 4.5597780  | 1.2394150  | H                                                       | -2.5110540 | 4.9900670  | -1.1778730 |
| H                                                       | -2.1299260 | 5.0248270  | -1.1236420 | H                                                       | -2.6649820 | 3.1016190  | -2.7892930 |
| H                                                       | -2.3614320 | 3.1487240  | -2.7401360 | H                                                       | -2.2745940 | 0.7806460  | -2.0162800 |
| H                                                       | -1.9970730 | 0.8164970  | -1.9891810 | C                                                       | 7.0333170  | -0.3386680 | -0.5084940 |
|                                                         |            |            |            | H                                                       | 7.4202220  | -1.3104920 | -0.1831780 |
|                                                         |            |            |            | H                                                       | 7.4070190  | -0.1665600 | -1.5272000 |
|                                                         |            |            |            | H                                                       | 7.4746400  | 0.4340230  | 0.1306440  |
| <b>TS<sup>3</sup> (3c)</b>                              |            |            |            | <b>TS<sup>3</sup> (3d)</b>                              |            |            |            |
| <b>E = -1293.88904866, H (0K) = -1293.499293,</b>       |            |            |            | <b>E = -1638.96347341, H (0K) = -1638.616120,</b>       |            |            |            |
| <b>H (298K) = -1293.474501, G (298K) = -1293.554107</b> |            |            |            | <b>H (298K) = -1638.592659, G (298K) = -1638.669767</b> |            |            |            |
| au                                                      |            |            |            | au                                                      |            |            |            |
| Imaginary frequency = 1.                                |            |            |            | Imaginary frequency = 1.                                |            |            |            |
| C                                                       | -1.9917810 | -0.0704260 | 0.4654810  | C                                                       | -1.9900170 | -0.0449290 | 0.4717820  |
| O                                                       | 0.3586600  | -1.2356340 | -0.8807230 | O                                                       | 0.3041490  | -1.3020200 | -0.9080900 |
| C                                                       | 0.8673320  | -0.1036400 | -0.4189810 | C                                                       | 0.8497340  | -0.1995900 | -0.4187210 |
| C                                                       | 0.3585940  | 0.2416950  | 1.0854580  | C                                                       | 0.3746890  | 0.1073690  | 1.0959390  |
| N                                                       | -0.9890780 | -0.3682580 | 1.2831810  | N                                                       | -1.0083550 | -0.4261700 | 1.2795380  |
| C                                                       | -0.9173870 | -1.6871040 | 1.9488310  | C                                                       | -1.0290320 | -1.7526210 | 1.9340090  |
| F                                                       | 0.3313760  | 1.5839710  | 1.3099810  | F                                                       | 0.4349100  | 1.4349950  | 1.3910310  |
| F                                                       | 1.1577610  | -0.2723170 | 2.0570050  | F                                                       | 1.1480260  | -0.5083250 | 2.0281660  |
| C                                                       | 2.4095030  | -0.0296210 | -0.3669150 | C                                                       | 2.3967270  | -0.1793240 | -0.3800470 |
| C                                                       | 3.1056720  | 1.1731390  | -0.1743450 | C                                                       | 3.1323510  | 0.9958020  | -0.1873230 |
| C                                                       | 4.4963800  | 1.2033990  | -0.1614160 | C                                                       | 4.5285670  | 0.9792520  | -0.1901430 |
| C                                                       | 5.2276910  | 0.0191810  | -0.3442340 | C                                                       | 5.1846570  | -0.2346990 | -0.3893050 |
| C                                                       | 4.5470470  | -1.1880960 | -0.5440320 | C                                                       | 4.4778450  | -1.4197280 | -0.5890600 |
| C                                                       | 3.1485920  | -1.1956720 | -0.5541830 | C                                                       | 3.0832910  | -1.3777860 | -0.5845840 |
| C                                                       | -3.0050030 | -1.0803020 | 0.0884600  | C                                                       | -3.0627170 | -0.9801620 | 0.0724290  |
| C                                                       | -4.3697840 | -0.8220960 | 0.3084200  | C                                                       | -4.4107390 | -0.6387560 | 0.2818470  |
| C                                                       | -5.3251280 | -1.7606340 | -0.0751940 | C                                                       | -5.4183440 | -1.5096800 | -0.1263740 |
| C                                                       | -4.9304000 | -2.9381970 | -0.7166400 | C                                                       | -5.0906640 | -2.6998130 | -0.7823400 |
| C                                                       | -3.5769370 | -3.1803280 | -0.9704610 | C                                                       | -3.7523600 | -3.0230190 | -1.0267640 |
| C                                                       | -2.6098520 | -2.2629370 | -0.5663750 | C                                                       | -2.7345140 | -2.1751230 | -0.5972320 |
| C                                                       | -2.2222420 | 1.3027770  | -0.0201260 | C                                                       | -2.1261610 | 1.3488940  | 0.0115880  |
| C                                                       | -2.2157830 | 2.3981120  | 0.8644090  | C                                                       | -2.0493930 | 2.4244020  | 0.9170910  |
| C                                                       | -2.5493120 | 3.6689520  | 0.4025170  | C                                                       | -2.2955380 | 3.7229700  | 0.4782490  |
| C                                                       | -2.8699500 | 3.8656540  | -0.9427500 | C                                                       | -2.5962430 | 3.9655840  | -0.8641270 |
| C                                                       | -2.8815620 | 2.7821510  | -1.8272260 | C                                                       | -2.6765190 | 2.9021970  | -1.7693300 |
| C                                                       | -2.5845040 | 1.5039320  | -1.3662060 | C                                                       | -2.4683570 | 1.5985460  | -1.3317930 |
| H                                                       | 0.5283900  | 0.8264710  | -0.9520600 | H                                                       | 0.5459640  | 0.7566060  | -0.9248990 |
| H                                                       | -0.2829020 | -2.3421050 | 1.3477110  | H                                                       | -0.4405470 | -2.4478330 | 1.3319410  |
| H                                                       | -1.9194850 | -2.0973020 | 2.0374290  | H                                                       | -2.0576960 | -2.0918300 | 2.0185660  |
| H                                                       | -0.4860550 | -1.5455620 | 2.9381140  | H                                                       | -0.5911600 | -1.6487930 | 2.9252420  |
| H                                                       | 2.5543460  | 2.1004580  | -0.0341450 | H                                                       | 2.6157360  | 1.9403790  | -0.0349530 |
| H                                                       | 5.0385100  | 2.1337880  | -0.0166740 | H                                                       | 5.0964690  | 1.8925230  | -0.0445530 |
| H                                                       | 5.0890270  | -2.1147590 | -0.6988010 | H                                                       | 5.0083910  | -2.3528200 | -0.7509120 |
| H                                                       | 2.5967990  | -2.1146920 | -0.7271380 | H                                                       | 2.4903680  | -2.2703110 | -0.7570080 |
| H                                                       | -4.6743830 | 0.0983930  | 0.7969120  | H                                                       | -4.6623140 | 0.2916810  | 0.7814640  |
| H                                                       | -6.3765440 | -1.5686910 | 0.1166390  | H                                                       | -6.4577880 | -1.2551500 | 0.0573570  |
| H                                                       | -5.6787560 | -3.6610710 | -1.0290290 | H                                                       | -5.8793460 | -3.3692790 | -1.1138240 |
| H                                                       | -3.2743150 | -4.0832970 | -1.4927730 | H                                                       | -3.5013990 | -3.9345690 | -1.5612530 |
| H                                                       | -1.5538270 | -2.3944760 | -0.7839580 | H                                                       | -1.6866970 | -2.3684420 | -0.8085270 |

|                                                                                                                                                |            |            |            |                                                                                                                                                |            |            |            |
|------------------------------------------------------------------------------------------------------------------------------------------------|------------|------------|------------|------------------------------------------------------------------------------------------------------------------------------------------------|------------|------------|------------|
| H                                                                                                                                              | -1.9783430 | 2.2437110  | 1.9103660  | H                                                                                                                                              | -1.8276460 | 2.2349500  | 1.9606360  |
| H                                                                                                                                              | -2.5591420 | 4.5056670  | 1.0944670  | H                                                                                                                                              | -2.2527570 | 4.5453690  | 1.1858620  |
| H                                                                                                                                              | -3.1198220 | 4.8602760  | -1.3006530 | H                                                                                                                                              | -2.7773000 | 4.9812380  | -1.2038550 |
| H                                                                                                                                              | -3.1314940 | 2.9330740  | -2.8729170 | H                                                                                                                                              | -2.9108880 | 3.0892740  | -2.8127290 |
| H                                                                                                                                              | -2.5999600 | 0.6589980  | -2.0465080 | H                                                                                                                                              | -2.5368770 | 0.7693690  | -2.0281350 |
| O                                                                                                                                              | 6.5911010  | 0.1516940  | -0.3196030 | Cl                                                                                                                                             | 6.9553400  | -0.2683380 | -0.4023520 |
| C                                                                                                                                              | 7.3797050  | -1.0177120 | -0.5022580 |                                                                                                                                                |            |            |            |
| H                                                                                                                                              | 8.4194970  | -0.6910540 | -0.4436160 |                                                                                                                                                |            |            |            |
| H                                                                                                                                              | 7.1877910  | -1.7598510 | 0.2830640  |                                                                                                                                                |            |            |            |
| H                                                                                                                                              | 7.1985460  | -1.4768860 | -1.4823660 |                                                                                                                                                |            |            |            |
| <b>TS<sup>3</sup> (3e)</b>                                                                                                                     |            |            |            | <b>Molecule 16</b>                                                                                                                             |            |            |            |
| <b>E = -1271.61610765, H (0K) = -1271.260419,</b><br><b>H (298K) = -1271.236403, G (298K) = -1271.314557</b><br>au<br>Imaginary frequency = 1. |            |            |            | <b>E = -1061.64809906, H (0K) = -1061.361680,</b><br><b>H (298K) = -1061.340913, G (298K) = -1061.412097</b><br>au<br>Imaginary frequency = 0. |            |            |            |
| C                                                                                                                                              | -1.8685140 | -0.0437170 | 0.4730580  | C                                                                                                                                              | 0.5159700  | 0.1403160  | 0.2602020  |
| O                                                                                                                                              | 0.4203260  | -1.3135850 | -0.9218110 | C                                                                                                                                              | -0.8695440 | -1.1626020 | 1.8363620  |
| C                                                                                                                                              | 0.9666020  | -0.2142270 | -0.4295780 | N                                                                                                                                              | -0.6644660 | -0.1790980 | 0.8515220  |
| C                                                                                                                                              | 0.5007430  | 0.0854740  | 1.0869030  | C                                                                                                                                              | -1.8831930 | 0.5948990  | 0.5886300  |
| N                                                                                                                                              | -0.8852330 | -0.4389380 | 1.2721270  | F                                                                                                                                              | -1.9850270 | -1.9197140 | 1.5905950  |
| C                                                                                                                                              | -0.9178050 | -1.7635680 | 1.9305370  | F                                                                                                                                              | 0.1677660  | -2.0050070 | 2.0154820  |
| F                                                                                                                                              | 0.5742550  | 1.4092030  | 1.3950020  | C                                                                                                                                              | 1.4366190  | -0.9276140 | -0.1330520 |
| F                                                                                                                                              | 1.2747640  | -0.5469340 | 2.0074150  | C                                                                                                                                              | 2.8360020  | -0.7419520 | -0.0922820 |
| C                                                                                                                                              | 2.5145340  | -0.1964470 | -0.3954520 | C                                                                                                                                              | 3.7026020  | -1.7525030 | -0.4973940 |
| C                                                                                                                                              | 3.2514420  | 0.9800920  | -0.2030440 | C                                                                                                                                              | 3.1979350  | -2.9761140 | -0.9505310 |
| C                                                                                                                                              | 4.6425330  | 0.9589160  | -0.2161740 | C                                                                                                                                              | 1.8160570  | -3.1777200 | -0.9958050 |
| C                                                                                                                                              | 5.3174250  | -0.2578780 | -0.4251900 | C                                                                                                                                              | 0.9439600  | -2.1697500 | -0.5929160 |
| C                                                                                                                                              | 4.5836050  | -1.4422370 | -0.6234930 | C                                                                                                                                              | 0.8865390  | 1.5591170  | 0.1253770  |
| C                                                                                                                                              | 3.1941360  | -1.3990520 | -0.6106280 | C                                                                                                                                              | 1.5508230  | 2.0320050  | -1.0252850 |
| C                                                                                                                                              | -2.9507530 | -0.9674890 | 0.0754480  | C                                                                                                                                              | 1.9007580  | 3.3744670  | -1.1459160 |
| C                                                                                                                                              | -4.2952860 | -0.6113730 | 0.2833820  | C                                                                                                                                              | 1.5973350  | 4.2798570  | -0.1239670 |
| C                                                                                                                                              | -5.3114800 | -1.4720690 | -0.1248890 | C                                                                                                                                              | 0.9444820  | 3.8266600  | 1.0249860  |
| C                                                                                                                                              | -4.9955910 | -2.6659490 | -0.7799040 | C                                                                                                                                              | 0.5961470  | 2.4828610  | 1.1515090  |
| C                                                                                                                                              | -3.6606000 | -3.0035270 | -1.0233280 | H                                                                                                                                              | -2.4810890 | 0.6604410  | 1.4999630  |
| C                                                                                                                                              | -2.6343540 | -2.1664690 | -0.5929900 | H                                                                                                                                              | -1.6231790 | 1.6087600  | 0.2844980  |
| C                                                                                                                                              | -1.9919640 | 1.3521870  | 0.0168250  | H                                                                                                                                              | 3.2391920  | 0.1966080  | 0.2741880  |
| C                                                                                                                                              | -1.8987320 | 2.4249330  | 0.9242970  | H                                                                                                                                              | 4.7759980  | -1.5898110 | -0.4508460 |
| C                                                                                                                                              | -2.1336320 | 3.7267940  | 0.4893760  | H                                                                                                                                              | 3.8763850  | -3.7629530 | -1.2684330 |
| C                                                                                                                                              | -2.4386690 | 3.9752770  | -0.8509870 | H                                                                                                                                              | 1.4147030  | -4.1214280 | -1.3552830 |
| C                                                                                                                                              | -2.5351560 | 2.9148340  | -1.7580600 | H                                                                                                                                              | -0.1288070 | -2.3140940 | -0.6681600 |
| C                                                                                                                                              | -2.3389740 | 1.6081150  | -1.3243350 | H                                                                                                                                              | 1.7775880  | 1.3397190  | -1.8302840 |
| H                                                                                                                                              | 0.6688060  | 0.7450190  | -0.9334010 | H                                                                                                                                              | 2.4051120  | 3.7179300  | -2.0450580 |
| H                                                                                                                                              | -0.3384150 | -2.4677660 | 1.3303640  | H                                                                                                                                              | 1.8700320  | 5.3268210  | -0.2216480 |
| H                                                                                                                                              | -1.9498590 | -2.0911500 | 2.0190440  | H                                                                                                                                              | 0.7168910  | 4.5180400  | 1.8318650  |
| H                                                                                                                                              | -0.4764170 | -1.6609900 | 2.9203870  | H                                                                                                                                              | 0.1172830  | 2.1334720  | 2.0625330  |
| H                                                                                                                                              | 2.7340090  | 1.9225440  | -0.0442750 | C                                                                                                                                              | -2.7029300 | -0.0511450 | -0.5263400 |
| H                                                                                                                                              | 5.2107900  | 1.8723050  | -0.0700620 | O                                                                                                                                              | -2.3182700 | -0.9168090 | -1.2815380 |
| H                                                                                                                                              | 5.1083930  | -2.3781220 | -0.7902470 | O                                                                                                                                              | -3.9172280 | 0.5141610  | -0.5640420 |
| H                                                                                                                                              | 2.5930790  | -2.2856870 | -0.7827840 | C                                                                                                                                              | -4.8018320 | 0.0456970  | -1.6051770 |
| H                                                                                                                                              | -4.5372390 | 0.3220150  | 0.7821940  | H                                                                                                                                              | -4.9931400 | -1.0228380 | -1.4849220 |
| H                                                                                                                                              | -6.3483500 | -1.2067410 | 0.0578740  | H                                                                                                                                              | -5.7211320 | 0.6166860  | -1.4820400 |
| H                                                                                                                                              | -5.7909780 | -3.3272990 | -1.1115750 | H                                                                                                                                              | -4.3616220 | 0.2311410  | -2.5874790 |
| H                                                                                                                                              | -3.4189320 | -3.9177530 | -1.5574400 |                                                                                                                                                |            |            |            |
| H                                                                                                                                              | -1.5888350 | -2.3715590 | -0.8043080 |                                                                                                                                                |            |            |            |
| H                                                                                                                                              | -1.6740900 | 2.2311130  | 1.9663760  |                                                                                                                                                |            |            |            |
| H                                                                                                                                              | -2.0787970 | 4.5471930  | 1.1984270  |                                                                                                                                                |            |            |            |
| H                                                                                                                                              | -2.6106740 | 4.9935030  | -1.1876420 |                                                                                                                                                |            |            |            |
| H                                                                                                                                              | -2.7730870 | 3.1066690  | -2.7997550 |                                                                                                                                                |            |            |            |
| H                                                                                                                                              | -2.4203570 | 0.7812500  | -2.0220180 |                                                                                                                                                |            |            |            |
| C                                                                                                                                              | 6.7489080  | -0.2883910 | -0.4434540 |                                                                                                                                                |            |            |            |
| N                                                                                                                                              | 7.9133260  | -0.3141560 | -0.4561750 |                                                                                                                                                |            |            |            |

| TS <sup>4</sup>                                                                                                                  |            |            |            | TS <sup>5</sup>                                                                                                                  |            |            |            |
|----------------------------------------------------------------------------------------------------------------------------------|------------|------------|------------|----------------------------------------------------------------------------------------------------------------------------------|------------|------------|------------|
| <b>E</b> = -1407.23077911, <b>H (0K)</b> = -1406.832799,<br><b>H (298K)</b> = -1406.804870, <b>G (298K)</b> = -1406.894023<br>au |            |            |            | <b>E</b> = -1407.23299921, <b>H (0K)</b> = -1406.834702,<br><b>H (298K)</b> = -1406.806964, <b>G (298K)</b> = -1406.895033<br>au |            |            |            |
| Imaginary frequency = 1.                                                                                                         |            |            |            | Imaginary frequency = 1.                                                                                                         |            |            |            |
| C                                                                                                                                | -1.2578380 | 0.4512910  | -0.0182850 | C                                                                                                                                | -1.5628910 | 0.1465550  | -0.0825980 |
| O                                                                                                                                | 1.2832500  | 0.5013470  | 2.3383570  | O                                                                                                                                | 1.5473780  | -1.2171500 | -2.0850590 |
| C                                                                                                                                | 2.0036890  | -0.3385130 | 1.7846130  | C                                                                                                                                | 1.8778820  | -0.0514980 | -1.8090010 |
| C                                                                                                                                | 0.9825140  | -0.5193390 | -0.4087630 | C                                                                                                                                | 0.8563640  | 0.5508650  | 0.2347160  |
| N                                                                                                                                | -0.4073050 | -0.5907470 | -0.1197330 | N                                                                                                                                | -0.3236120 | -0.2457590 | 0.2792500  |
| C                                                                                                                                | -0.8116860 | -1.9508870 | 0.2610140  | C                                                                                                                                | -0.0001090 | -1.6500650 | 0.5713780  |
| F                                                                                                                                | 1.3718470  | -1.5556120 | -1.2154800 | F                                                                                                                                | 0.6200480  | 1.8764770  | 0.1271260  |
| F                                                                                                                                | 1.3573680  | 0.6287460  | -1.0036680 | F                                                                                                                                | 1.6248920  | 0.3571430  | 1.3476830  |
| C                                                                                                                                | 3.3443080  | -0.0261320 | 1.2176900  | C                                                                                                                                | 3.2530310  | 0.3161830  | -1.3635280 |
| C                                                                                                                                | 4.1806310  | -1.0606400 | 0.7749830  | C                                                                                                                                | 3.6267870  | 1.6637440  | -1.2538170 |
| C                                                                                                                                | 5.4493110  | -0.7740370 | 0.2726240  | C                                                                                                                                | 4.9228240  | 2.0064770  | -0.8709480 |
| C                                                                                                                                | 5.8901000  | 0.5513890  | 0.2084470  | C                                                                                                                                | 5.8575000  | 1.0036010  | -0.5953320 |
| C                                                                                                                                | 5.0589920  | 1.5879000  | 0.6484830  | C                                                                                                                                | 5.4917090  | -0.3423830 | -0.7071110 |
| C                                                                                                                                | 3.7921670  | 1.3011000  | 1.1513730  | C                                                                                                                                | 4.1970810  | -0.6845760 | -1.0916640 |
| C                                                                                                                                | -1.1823900 | 1.5598890  | -0.9741790 | C                                                                                                                                | -2.4095240 | -0.7458170 | -0.8918160 |
| C                                                                                                                                | -1.4715510 | 2.8799230  | -0.5696330 | C                                                                                                                                | -3.7920560 | -0.8467580 | -0.6343730 |
| C                                                                                                                                | -1.4455880 | 3.9241460  | -1.4886360 | C                                                                                                                                | -4.5982390 | -1.6776560 | -1.4077290 |
| C                                                                                                                                | -1.1436140 | 3.6723340  | -2.8313610 | C                                                                                                                                | -4.0443580 | -2.4186120 | -2.4561560 |
| C                                                                                                                                | -0.8680350 | 2.3677350  | -3.2490970 | C                                                                                                                                | -2.6764640 | -2.3226100 | -2.7255340 |
| C                                                                                                                                | -0.8832640 | 1.3196910  | -2.3325990 | C                                                                                                                                | -1.8607700 | -1.4949420 | -1.9560040 |
| C                                                                                                                                | -2.2976370 | 0.4619630  | 1.0317980  | C                                                                                                                                | -2.0441950 | 1.4733470  | 0.3121630  |
| C                                                                                                                                | -3.6258110 | 0.7992060  | 0.7054790  | C                                                                                                                                | -1.6981120 | 2.0069140  | 1.5726260  |
| C                                                                                                                                | -4.6159290 | 0.8072270  | 1.6854480  | C                                                                                                                                | -2.1896240 | 3.2450920  | 1.9757130  |
| C                                                                                                                                | -4.2983910 | 0.4873340  | 3.0086430  | C                                                                                                                                | -3.0277980 | 3.9779210  | 1.1309140  |
| C                                                                                                                                | -2.9808580 | 0.1664290  | 3.3467680  | C                                                                                                                                | -3.3787940 | 3.4617060  | -0.1209630 |
| C                                                                                                                                | -1.9843530 | 0.1548970  | 2.3718700  | C                                                                                                                                | -2.8970520 | 2.2208540  | -0.5267660 |
| H                                                                                                                                | 1.8087420  | -1.4221050 | 1.9070360  | H                                                                                                                                | 1.2709800  | 0.8023010  | -2.1672250 |
| H                                                                                                                                | 0.0032170  | -2.4567060 | 0.7798530  | H                                                                                                                                | 0.9321920  | -1.9300060 | 0.0809790  |
| H                                                                                                                                | -1.6656860 | -1.9115600 | 0.9362860  | H                                                                                                                                | -0.7879750 | -2.2959890 | 0.1843850  |
| H                                                                                                                                | 3.8304520  | -2.0895590 | 0.8246300  | H                                                                                                                                | 2.8941340  | 2.4399310  | -1.4623880 |
| H                                                                                                                                | 6.0943160  | -1.5798200 | -0.0671030 | H                                                                                                                                | 5.2057030  | 3.0523930  | -0.7881680 |
| H                                                                                                                                | 6.8789700  | 0.7764440  | -0.1819890 | H                                                                                                                                | 6.8682530  | 1.2695170  | -0.2976580 |
| H                                                                                                                                | 5.4033100  | 2.6175360  | 0.5990510  | H                                                                                                                                | 6.2196290  | -1.1218060 | -0.4975670 |
| H                                                                                                                                | 3.1343890  | 2.0902600  | 1.5024130  | H                                                                                                                                | 3.8981540  | -1.7233890 | -1.1949090 |
| H                                                                                                                                | -1.6969360 | 3.0808340  | 0.4728150  | H                                                                                                                                | -4.2249490 | -0.2835210 | 0.1863080  |
| H                                                                                                                                | -1.6573140 | 4.9371320  | -1.1583260 | H                                                                                                                                | -5.6597490 | -1.7513830 | -1.1889300 |
| H                                                                                                                                | -1.1301710 | 4.4883350  | -3.5485200 | H                                                                                                                                | -4.6757530 | -3.0635400 | -3.0607910 |
| H                                                                                                                                | -0.6482870 | 2.1646150  | -4.2934540 | H                                                                                                                                | -2.2426340 | -2.8862310 | -3.5468990 |
| H                                                                                                                                | -0.7110100 | 0.3005940  | -2.6628170 | H                                                                                                                                | -0.7999860 | -1.4101890 | -2.1832330 |
| H                                                                                                                                | -3.8790180 | 1.0369430  | -0.3231490 | H                                                                                                                                | -1.0773730 | 1.4186170  | 2.2408230  |
| H                                                                                                                                | -5.6375930 | 1.0590140  | 1.4150420  | H                                                                                                                                | -1.9244650 | 3.6360470  | 2.9539100  |
| H                                                                                                                                | -5.0711600 | 0.4967540  | 3.7722200  | H                                                                                                                                | -3.4104400 | 4.9441590  | 1.4474970  |
| H                                                                                                                                | -2.7236150 | -0.0599590 | 4.3779690  | H                                                                                                                                | -4.0252550 | 4.0305230  | -0.7831480 |
| H                                                                                                                                | -0.9483040 | -0.0368680 | 2.6388910  | H                                                                                                                                | -3.1631950 | 1.8302490  | -1.5036160 |
| C                                                                                                                                | -1.2121080 | -2.7424430 | -0.9830440 | C                                                                                                                                | 0.0773040  | -1.8603110 | 2.0819910  |
| O                                                                                                                                | -1.5076030 | -2.2626420 | -2.0556220 | O                                                                                                                                | -0.4614630 | -1.1657580 | 2.9167620  |
| O                                                                                                                                | -1.2292710 | -4.0489360 | -0.6939670 | O                                                                                                                                | 0.7830940  | -2.9666630 | 2.3450730  |
| C                                                                                                                                | -1.6557320 | -4.9275950 | -1.7588340 | C                                                                                                                                | 0.8711490  | -3.3449900 | 3.7363360  |
| H                                                                                                                                | -0.9826120 | -4.8360140 | -2.6139190 | H                                                                                                                                | -0.1265080 | -3.5216740 | 4.1444660  |
| H                                                                                                                                | -1.6111470 | -5.9318440 | -1.3398110 | H                                                                                                                                | 1.4601450  | -4.2610080 | 3.7498550  |
| H                                                                                                                                | -2.6749100 | -4.6823690 | -2.0656060 | H                                                                                                                                | 1.3679760  | -2.5589480 | 4.3090910  |
| <b>Molecule 17</b>                                                                                                               |            |            |            | <b>TS<sup>6</sup></b>                                                                                                            |            |            |            |
| <b>E</b> = -1407.24383826, <b>H (0K)</b> = -1406.843406,<br><b>H (298K)</b> = -1406.816197, <b>G (298K)</b> = -1406.902023<br>au |            |            |            | <b>E</b> = -1407.23663505, <b>H (0K)</b> = -1406.836629,<br><b>H (298K)</b> = -1406.809951, <b>G (298K)</b> = -1406.894894<br>au |            |            |            |

|                                                                                                                                  |            |            |            |                                                                                                                                  |            |            |            |
|----------------------------------------------------------------------------------------------------------------------------------|------------|------------|------------|----------------------------------------------------------------------------------------------------------------------------------|------------|------------|------------|
| Imaginary frequency = 0.                                                                                                         |            |            |            | Imaginary frequency = 1.                                                                                                         |            |            |            |
| C                                                                                                                                | 1.4325840  | -0.2642170 | -0.0162700 | C                                                                                                                                | -1.8685140 | -0.0437170 | 0.4730580C |
| O                                                                                                                                | -1.3495390 | 0.9068120  | -1.8768360 | O                                                                                                                                | -1.3990860 | -0.2263290 | -0.0448010 |
| C                                                                                                                                | -1.5762360 | -0.1598390 | -1.1223410 | O                                                                                                                                | 0.8103730  | -0.1797380 | 1.9313910  |
| C                                                                                                                                | -0.9987380 | 0.0028280  | 0.3785500  | C                                                                                                                                | 1.3868570  | -0.7591730 | 0.8891930  |
| N                                                                                                                                | 0.3847160  | 0.5204360  | 0.2775450  | C                                                                                                                                | 1.0103930  | -0.0237830 | -0.4969770 |
| C                                                                                                                                | 0.3938220  | 1.9800130  | 0.0932210  | N                                                                                                                                | -0.3685590 | 0.5498740  | -0.3775420 |
| F                                                                                                                                | -1.0391500 | -1.1751720 | 1.0441500  | C                                                                                                                                | -0.3662290 | 1.9901860  | -0.0755090 |
| F                                                                                                                                | -1.7203450 | 0.8945820  | 1.1098220  | F                                                                                                                                | 1.1143800  | -0.8522570 | -1.5673360 |
| C                                                                                                                                | -3.0562640 | -0.5712790 | -0.9826190 | F                                                                                                                                | 1.8287780  | 1.0315810  | -0.7666880 |
| C                                                                                                                                | -3.4475740 | -1.8728150 | -0.6449260 | C                                                                                                                                | 2.9329770  | -0.8175460 | 0.9173110  |
| C                                                                                                                                | -4.8009280 | -2.2074450 | -0.5521990 | C                                                                                                                                | 3.6639520  | -1.6848820 | 0.0962810  |
| C                                                                                                                                | -5.7793520 | -1.2388310 | -0.7909610 | C                                                                                                                                | 5.0585100  | -1.7278540 | 0.1709010  |
| C                                                                                                                                | -5.3955400 | 0.0628010  | -1.1291800 | C                                                                                                                                | 5.7377270  | -0.9001330 | 1.0693000  |
| C                                                                                                                                | -4.0427620 | 0.3901000  | -1.2256780 | C                                                                                                                                | 5.0124720  | -0.0342120 | 1.8934840  |
| C                                                                                                                                | 2.3935630  | 0.1489910  | -1.0449030 | C                                                                                                                                | 3.6192430  | 0.0025280  | 1.8167300  |
| C                                                                                                                                | 3.7759470  | -0.0730290 | -0.8826790 | C                                                                                                                                | -2.4783130 | 0.2487900  | 0.8404310  |
| C                                                                                                                                | 4.6599000  | 0.2735750  | -1.8996070 | C                                                                                                                                | -3.8221370 | 0.1243240  | 0.4406170  |
| C                                                                                                                                | 4.1742090  | 0.8169420  | -3.0936150 | C                                                                                                                                | -4.8410500 | 0.5473950  | 1.2901880  |
| C                                                                                                                                | 2.8015430  | 1.0215460  | -3.2693020 | C                                                                                                                                | -4.5308390 | 1.0577200  | 2.5542260  |
| C                                                                                                                                | 1.9071840  | 0.7030910  | -2.2516240 | C                                                                                                                                | -3.1984670 | 1.1497260  | 2.9693880  |
| C                                                                                                                                | 1.6466900  | -1.5148030 | 0.7135430  | C                                                                                                                                | -2.1685820 | 0.7543320  | 2.1202810  |
| C                                                                                                                                | 1.4308280  | -1.5466420 | 2.1086370  | C                                                                                                                                | -1.5599250 | -1.5577090 | -0.6451710 |
| C                                                                                                                                | 1.7247100  | -2.6968010 | 2.8327250  | C                                                                                                                                | -1.4026250 | -1.7319470 | -2.0349470 |
| C                                                                                                                                | 2.2160150  | -3.8307520 | 2.1785020  | C                                                                                                                                | -1.6724580 | -2.9684200 | -2.6143050 |
| C                                                                                                                                | 2.4321180  | -3.8094990 | 0.7961660  | C                                                                                                                                | -2.0751010 | -4.0433330 | -1.8175050 |
| C                                                                                                                                | 2.1653320  | -2.6557860 | 0.0672040  | C                                                                                                                                | -2.2350570 | -3.8775030 | -0.4373100 |
| H                                                                                                                                | -0.9976650 | -1.0825820 | -1.4138790 | C                                                                                                                                | -2.0037490 | -2.6364680 | 0.1453460  |
| H                                                                                                                                | -0.4327120 | 2.2435170  | -0.5748380 | H                                                                                                                                | 1.0449010  | -1.8069700 | 0.6667580  |
| H                                                                                                                                | 1.3286600  | 2.2844260  | -0.3765590 | H                                                                                                                                | 0.3456540  | 2.1985690  | 0.7230510  |
| H                                                                                                                                | -2.6906290 | -2.6319310 | -0.4611210 | H                                                                                                                                | -1.3581920 | 2.2822100  | 0.2670540  |
| H                                                                                                                                | -5.0913750 | -3.2240080 | -0.2978610 | H                                                                                                                                | 3.1402100  | -2.3341760 | -0.6022380 |
| H                                                                                                                                | -6.8328420 | -1.4978930 | -0.7207450 | H                                                                                                                                | 5.6143570  | -2.4101170 | -0.4680650 |
| H                                                                                                                                | -6.1527540 | 0.8193090  | -1.3219900 | H                                                                                                                                | 6.8225130  | -0.9359770 | 1.1321560  |
| H                                                                                                                                | -3.7163320 | 1.3855440  | -1.5110320 | H                                                                                                                                | 5.5348130  | 0.6068320  | 2.6002410  |
| H                                                                                                                                | 4.1494500  | -0.4920840 | 0.0459070  | H                                                                                                                                | 3.0263240  | 0.6463490  | 2.4591960  |
| H                                                                                                                                | 5.7260350  | 0.1194900  | -1.7641050 | H                                                                                                                                | -4.0595160 | -0.2762740 | -0.5397760 |
| H                                                                                                                                | 4.8666550  | 1.0780310  | -3.8888670 | H                                                                                                                                | -5.8757590 | 0.4719060  | 0.9701110  |
| H                                                                                                                                | 2.4279160  | 1.4272730  | -4.2048590 | H                                                                                                                                | -5.3289180 | 1.3726280  | 3.2205000  |
| H                                                                                                                                | 0.8297300  | 0.8387760  | -2.3765770 | H                                                                                                                                | -2.9624160 | 1.5199290  | 3.9626950  |
| H                                                                                                                                | 1.0770720  | -0.6507720 | 2.6081460  | H                                                                                                                                | -1.1248290 | 0.7605550  | 2.4232260  |
| H                                                                                                                                | 1.5748910  | -2.7091560 | 3.9079830  | H                                                                                                                                | -1.1064090 | -0.8888670 | -2.6480690 |
| H                                                                                                                                | 2.4375940  | -4.7297180 | 2.7464570  | H                                                                                                                                | -1.5697930 | -3.0924690 | -3.6879460 |
| H                                                                                                                                | 2.8100710  | -4.6922470 | 0.2896800  | H                                                                                                                                | -2.2742780 | -5.0091910 | -2.2726950 |
| H                                                                                                                                | 2.3266070  | -2.6383660 | -1.0055440 | H                                                                                                                                | -2.5486270 | -4.7134160 | 0.1802270  |
| C                                                                                                                                | 0.3123020  | 2.6651230  | 1.4529850  | H                                                                                                                                | -2.1318210 | -2.4992330 | 1.2139280  |
| O                                                                                                                                | 0.6067850  | 2.1597050  | 2.5160470  | C                                                                                                                                | -0.0649250 | 2.7877710  | -1.3398170 |
| O                                                                                                                                | -0.0778020 | 3.9352630  | 1.2917330  | O                                                                                                                                | -0.2530440 | 2.3930520  | -2.4703390 |
| C                                                                                                                                | -0.1225160 | 4.7405240  | 2.4896310  | O                                                                                                                                | 0.3750320  | 4.0072440  | -1.0113890 |
| H                                                                                                                                | 0.8651110  | 4.7845260  | 2.9542590  | C                                                                                                                                | 0.6254140  | 4.9066890  | -2.1138550 |
| H                                                                                                                                | -0.4372480 | 5.7300310  | 2.1608190  | H                                                                                                                                | -0.2895660 | 5.0643270  | -2.6891680 |
| H                                                                                                                                | -0.8423530 | 4.3230860  | 3.1970410  | H                                                                                                                                | 0.9580180  | 5.8376140  | -1.6568750 |
|                                                                                                                                  |            |            |            | H                                                                                                                                | 1.4019240  | 4.4972730  | -2.7635030 |
| Molecule conformer of <b>18</b> (from TS <sup>6</sup> )                                                                          |            |            |            | TS <sup>7</sup>                                                                                                                  |            |            |            |
| <b>E</b> = -1407.31281826, <b>H (0K)</b> = -1406.909916,<br><b>H (298K)</b> = -1406.883088, <b>G (298K)</b> = -1406.969638<br>au |            |            |            | <b>E</b> = -1407.23419132, <b>H (0K)</b> = -1406.838344,<br><b>H (298K)</b> = -1406.811373, <b>G (298K)</b> = -1406.896958<br>au |            |            |            |
| Imaginary frequency = 0.                                                                                                         |            |            |            | Imaginary frequency = 1.                                                                                                         |            |            |            |
| C                                                                                                                                | -0.4890620 | -0.7719670 | -0.0561730 | C                                                                                                                                | 1.1919540  | 0.5154000  | 0.2041270  |
| O                                                                                                                                | 0.9140890  | -1.1053190 | -0.1437740 | O                                                                                                                                | -1.9649590 | -2.3626670 | 0.2468680  |
| C                                                                                                                                | 1.5965150  | 0.0173050  | -0.6917760 | C                                                                                                                                | -2.1362200 | -1.1040210 | 0.7674760  |

|                                                                |            |            |            |                                                                |            |            |            |
|----------------------------------------------------------------|------------|------------|------------|----------------------------------------------------------------|------------|------------|------------|
| C                                                              | 0.8404460  | 1.1823300  | -0.0385300 | C                                                              | -1.2081140 | -0.0881700 | 0.0166190  |
| N                                                              | -0.4757170 | 0.7139230  | 0.0650120  | N                                                              | 0.2350940  | -0.4053840 | 0.1857260  |
| C                                                              | -1.4177460 | 1.4499250  | 0.8851630  | C                                                              | 0.5324190  | -1.8591820 | 0.1544110  |
| F                                                              | 0.9458700  | 2.3426020  | -0.7646700 | F                                                              | -1.4222420 | 1.1733450  | 0.4775540  |
| F                                                              | 1.3836080  | 1.5158010  | 1.1977090  | F                                                              | -1.5007510 | -0.0987160 | -1.3152280 |
| C                                                              | 3.0778310  | -0.0295430 | -0.4149820 | C                                                              | -3.5810840 | -0.6126760 | 0.6601420  |
| C                                                              | 3.9350520  | 0.7597120  | -1.1919190 | C                                                              | -4.1196670 | 0.2897900  | 1.5844270  |
| C                                                              | 5.3074850  | 0.7668810  | -0.9413060 | C                                                              | -5.4445740 | 0.7168360  | 1.4717620  |
| C                                                              | 5.8356830  | -0.0248330 | 0.0815320  | C                                                              | -6.2446640 | 0.2454690  | 0.4279350  |
| C                                                              | 4.9840510  | -0.8184330 | 0.8531670  | C                                                              | -5.7125770 | -0.6563570 | -0.4981470 |
| C                                                              | 3.6089740  | -0.8177830 | 0.6109930  | C                                                              | -4.3887290 | -1.0821970 | -0.3815310 |
| C                                                              | -1.0322370 | -1.4435310 | 1.2094570  | C                                                              | 2.5006330  | 0.1828180  | 0.7982190  |
| C                                                              | -2.2763910 | -2.0830250 | 1.2433370  | C                                                              | 3.6850830  | 0.5399470  | 0.1292710  |
| C                                                              | -2.7506120 | -2.6478020 | 2.4315200  | C                                                              | 4.9223380  | 0.2635940  | 0.7063890  |
| C                                                              | -1.9861080 | -2.5786310 | 3.5955240  | C                                                              | 4.9884190  | -0.3312820 | 1.9687300  |
| C                                                              | -0.7466630 | -1.9310980 | 3.5715760  | C                                                              | 3.8140110  | -0.6594940 | 2.6540280  |
| C                                                              | -0.2757680 | -1.3639670 | 2.3895000  | C                                                              | 2.5750720  | -0.4188520 | 2.0689550  |
| C                                                              | -1.1679930 | -1.2424290 | -1.3498270 | C                                                              | 1.0337280  | 1.8695330  | -0.3458090 |
| C                                                              | -1.9123240 | -0.3843490 | -2.1639670 | C                                                              | 0.5020740  | 2.0601110  | -1.6367100 |
| C                                                              | -2.4962820 | -0.8628740 | -3.3424750 | C                                                              | 0.4519220  | 3.3392720  | -2.1821320 |
| C                                                              | -2.3356140 | -2.1953200 | -3.7200300 | C                                                              | 0.9026070  | 4.4375390  | -1.4444250 |
| C                                                              | -1.5836080 | -3.0557540 | -2.9131380 | C                                                              | 1.4340500  | 4.2549090  | -0.1639660 |
| C                                                              | -1.0056020 | -2.5825720 | -1.7372040 | C                                                              | 1.5241470  | 2.9759670  | 0.3753310  |
| H                                                              | 1.4154060  | 0.0910830  | -1.7740950 | H                                                              | -1.8286000 | -1.0029900 | 1.8326720  |
| H                                                              | -0.9792470 | 1.7607170  | 1.8393130  | H                                                              | -0.6919380 | -2.3553800 | 0.1034250  |
| H                                                              | -2.2611520 | 0.7960660  | 1.1269710  | H                                                              | 0.9246270  | -2.2308420 | 1.0970480  |
| H                                                              | 3.5267840  | 1.3709770  | -1.9930140 | H                                                              | -3.5016480 | 0.6558660  | 2.4012040  |
| H                                                              | 5.9634530  | 1.3836380  | -1.5493870 | H                                                              | -5.8527900 | 1.4121680  | 2.2009100  |
| H                                                              | 6.9053360  | -0.0265990 | 0.2724930  | H                                                              | -7.2773070 | 0.5734350  | 0.3407390  |
| H                                                              | 5.3895960  | -1.4400000 | 1.6469040  | H                                                              | -6.3315430 | -1.0304960 | -1.3099480 |
| H                                                              | 2.9472990  | -1.4385750 | 1.2051610  | H                                                              | -3.9645930 | -1.7963830 | -1.0791710 |
| H                                                              | -2.8777970 | -2.1476300 | 0.3429970  | H                                                              | 3.6298570  | 1.0038330  | -0.8496400 |
| H                                                              | -3.7173310 | -3.1434770 | 2.4408530  | H                                                              | 5.8333380  | 0.5199950  | 0.1745970  |
| H                                                              | -2.3525520 | -3.0217380 | 4.5174220  | H                                                              | 5.9540510  | -0.5327160 | 2.4231980  |
| H                                                              | -0.1474310 | -1.8667980 | 4.4756550  | H                                                              | 3.8644380  | -1.1022890 | 3.6439290  |
| H                                                              | 0.6771760  | -0.8459650 | 2.3757410  | H                                                              | 1.6640400  | -0.6583560 | 2.6079250  |
| H                                                              | -2.0224230 | 0.6591490  | -1.8884690 | H                                                              | 0.1748510  | 1.2031550  | -2.2107820 |
| H                                                              | -3.0719940 | -0.1849330 | -3.9671900 | H                                                              | 0.0629170  | 3.4788340  | -3.1860280 |
| H                                                              | -2.7875480 | -2.5633530 | -4.6372570 | H                                                              | 0.8499830  | 5.4348840  | -1.8712860 |
| H                                                              | -1.4455250 | -4.0941970 | -3.2021370 | H                                                              | 1.7878840  | 5.1072780  | 0.4076700  |
| H                                                              | -0.4171260 | -3.2519460 | -1.1165550 | H                                                              | 1.9455690  | 2.8300570  | 1.3644280  |
| C                                                              | -1.9977040 | 2.6785280  | 0.1837960  | C                                                              | 1.3770950  | -2.1952580 | -1.0022860 |
| O                                                              | -2.1414490 | 2.8218240  | -1.0121590 | O                                                              | 1.6146250  | -1.4797840 | -1.9676130 |
| O                                                              | -2.3827260 | 3.5801320  | 1.1014530  | O                                                              | 1.8330810  | -3.4681350 | -0.8961180 |
| C                                                              | -3.0330430 | 4.7630810  | 0.5925650  | C                                                              | 2.5980660  | -3.9511290 | -2.0118950 |
| H                                                              | -3.9361180 | 4.4928350  | 0.0402580  | H                                                              | 3.4881270  | -3.3354540 | -2.1669150 |
| H                                                              | -3.2835440 | 5.3573390  | 1.4705320  | H                                                              | 2.8836120  | -4.9705130 | -1.7507630 |
| H                                                              | -2.3555340 | 5.3141450  | -0.0636280 | H                                                              | 1.9964990  | -3.9487790 | -2.9248510 |
| <b>Molecule 19</b>                                             |            |            |            | <b>TS<sup>8</sup></b>                                          |            |            |            |
| <b>E</b> = -1407.24840157, <b>H (0K)</b> = -1406.848334,       |            |            |            | <b>E</b> = -1407.24568294, <b>H (0K)</b> = -1406.845590,       |            |            |            |
| <b>H (298K)</b> = -1406.820778, <b>G (298K)</b> = -1406.907711 |            |            |            | <b>H (298K)</b> = -1406.818979, <b>G (298K)</b> = -1406.902338 |            |            |            |
| au                                                             |            |            |            | au                                                             |            |            |            |
| Imaginary frequency = 0.                                       |            |            |            | Imaginary frequency = 1.                                       |            |            |            |
| C                                                              | 1.1492570  | 0.5007530  | 0.1562210  | C                                                              | 1.3997030  | 0.0610720  | 0.3753440  |
| O                                                              | -2.2097380 | -2.2361190 | -0.8700080 | O                                                              | -2.0162130 | 0.8568010  | -1.4340310 |
| C                                                              | -2.1702140 | -1.3060710 | 0.1938090  | C                                                              | -2.1950650 | -0.3334820 | -0.6962800 |
| C                                                              | -1.2183260 | -0.1234930 | -0.1540500 | C                                                              | -1.0965130 | -0.4789770 | 0.3854240  |
| N                                                              | 0.2210870  | -0.4570800 | -0.0343480 | N                                                              | 0.2229110  | -0.4541870 | -0.1528730 |
| C                                                              | 0.6048520  | -1.7928850 | -0.2355590 | C                                                              | 0.6867580  | -1.1188500 | -1.2969220 |
| F                                                              | -1.4628280 | 0.9215890  | 0.6787640  | F                                                              | -1.3157280 | -1.6831280 | 1.0453610  |
| F                                                              | -1.4950600 | 0.2902310  | -1.4226990 | F                                                              | -1.1855440 | 0.4870340  | 1.3375930  |

|                                                                                                                                  |            |            |            |                                                                                                                                  |            |            |            |
|----------------------------------------------------------------------------------------------------------------------------------|------------|------------|------------|----------------------------------------------------------------------------------------------------------------------------------|------------|------------|------------|
| C                                                                                                                                | -3.5760390 | -0.7930560 | 0.4440040  | C                                                                                                                                | -3.5763540 | -0.3387630 | -0.0695990 |
| C                                                                                                                                | -4.0262000 | -0.5809480 | 1.7513220  | C                                                                                                                                | -4.2657530 | -1.5428970 | 0.1120560  |
| C                                                                                                                                | -5.3161900 | -0.1017270 | 1.9857630  | C                                                                                                                                | -5.5286470 | -1.5530510 | 0.7068200  |
| C                                                                                                                                | -6.1667970 | 0.1676990  | 0.9114660  | C                                                                                                                                | -6.1138980 | -0.3561240 | 1.1256050  |
| C                                                                                                                                | -5.7218020 | -0.0439360 | -0.3961790 | C                                                                                                                                | -5.4291800 | 0.8487640  | 0.9473820  |
| C                                                                                                                                | -4.4312050 | -0.5194000 | -0.6306710 | C                                                                                                                                | -4.1651100 | 0.8580700  | 0.3562260  |
| C                                                                                                                                | 2.3805330  | 0.1829410  | 0.9012740  | C                                                                                                                                | 2.4225770  | -0.9096450 | 0.8461520  |
| C                                                                                                                                | 3.6183320  | 0.6934530  | 0.4776840  | C                                                                                                                                | 3.7967800  | -0.7252390 | 0.6067840  |
| C                                                                                                                                | 4.7716240  | 0.4685240  | 1.2312050  | C                                                                                                                                | 4.7294740  | -1.6434320 | 1.0848410  |
| C                                                                                                                                | 4.7004660  | -0.2546430 | 2.4213870  | C                                                                                                                                | 4.3088560  | -2.7589020 | 1.8139490  |
| C                                                                                                                                | 3.4677800  | -0.7590660 | 2.8577860  | C                                                                                                                                | 2.9458280  | -2.9543280 | 2.0542470  |
| C                                                                                                                                | 2.3203190  | -0.5531670 | 2.1024730  | C                                                                                                                                | 2.0088850  | -2.0437190 | 1.5718140  |
| C                                                                                                                                | 0.9892150  | 1.8669000  | -0.3723180 | C                                                                                                                                | 1.5754730  | 1.4960800  | 0.5665650  |
| C                                                                                                                                | 0.6667750  | 2.0865160  | -1.7244960 | C                                                                                                                                | 0.7116940  | 2.4251010  | -0.0598070 |
| C                                                                                                                                | 0.5797490  | 3.3851010  | -2.2231450 | C                                                                                                                                | 0.8610320  | 3.7905040  | 0.1544330  |
| C                                                                                                                                | 0.8009940  | 4.4780100  | -1.3825550 | C                                                                                                                                | 1.8649300  | 4.2680450  | 1.0010600  |
| C                                                                                                                                | 1.1325520  | 4.2693530  | -0.0395970 | C                                                                                                                                | 2.7160200  | 3.3648120  | 1.6465850  |
| C                                                                                                                                | 1.2440770  | 2.9753570  | 0.4590420  | C                                                                                                                                | 2.5789790  | 1.9991170  | 1.4332870  |
| H                                                                                                                                | -1.7877460 | -1.7546520 | 1.1220820  | H                                                                                                                                | -2.0850500 | -1.2211870 | -1.3368300 |
| H                                                                                                                                | -1.2803800 | -2.4547920 | -1.0861130 | H                                                                                                                                | -1.1694230 | 0.8081100  | -1.9379700 |
| H                                                                                                                                | 0.1760410  | -2.5609460 | 0.3937800  | H                                                                                                                                | 0.8283190  | -2.1947590 | -1.2937440 |
| H                                                                                                                                | -3.3683720 | -0.7960660 | 2.5899290  | H                                                                                                                                | -3.8147980 | -2.4760910 | -0.2156310 |
| H                                                                                                                                | -5.6570680 | 0.0545970  | 3.0054890  | H                                                                                                                                | -6.0560430 | -2.4941630 | 0.8371130  |
| H                                                                                                                                | -7.1727860 | 0.5366350  | 1.0920480  | H                                                                                                                                | -7.0989470 | -0.3616250 | 1.5844790  |
| H                                                                                                                                | -6.3806730 | 0.1616000  | -1.2354710 | H                                                                                                                                | -5.8797140 | 1.7837760  | 1.2697340  |
| H                                                                                                                                | -4.0844370 | -0.6906360 | -1.6438130 | H                                                                                                                                | -3.6338830 | 1.7924310  | 0.2106070  |
| H                                                                                                                                | 3.6747210  | 1.2521950  | -0.4500120 | H                                                                                                                                | 4.1299760  | 0.1252730  | 0.0199060  |
| H                                                                                                                                | 5.7238050  | 0.8607950  | 0.8858350  | H                                                                                                                                | 5.7854600  | -1.4919470 | 0.8798500  |
| H                                                                                                                                | 5.5963140  | -0.4239350 | 3.0120690  | H                                                                                                                                | 5.0371570  | -3.4728170 | 2.1879460  |
| H                                                                                                                                | 3.4045390  | -1.3089720 | 3.7924450  | H                                                                                                                                | 2.6107170  | -3.8178500 | 2.6219770  |
| H                                                                                                                                | 1.3673890  | -0.9438150 | 2.4458850  | H                                                                                                                                | 0.9509280  | -2.2007070 | 1.7549680  |
| H                                                                                                                                | 0.5248140  | 1.2373710  | -2.3818070 | H                                                                                                                                | -0.0689900 | 2.0656140  | -0.7120170 |
| H                                                                                                                                | 0.3460440  | 3.5417420  | -3.2722060 | H                                                                                                                                | 0.1911710  | 4.4859790  | -0.3426250 |
| H                                                                                                                                | 0.7263710  | 5.4888840  | -1.7732100 | H                                                                                                                                | 1.9789510  | 5.3359130  | 1.1646100  |
| H                                                                                                                                | 1.3097520  | 5.1164300  | 0.6166620  | H                                                                                                                                | 3.4834620  | 3.7269860  | 2.3242240  |
| H                                                                                                                                | 1.5074740  | 2.8140090  | 1.4996670  | H                                                                                                                                | 3.2259550  | 1.3136130  | 1.9660670  |
| C                                                                                                                                | 1.7269070  | -2.0826730 | -1.0669810 | C                                                                                                                                | 0.8996900  | -0.3732180 | -2.5007290 |
| O                                                                                                                                | 2.3817070  | -1.2960670 | -1.7561800 | O                                                                                                                                | 0.4760860  | 0.7720350  | -2.7380630 |
| O                                                                                                                                | 1.9879460  | -3.4320950 | -1.0603920 | O                                                                                                                                | 1.5768770  | -1.0915620 | -3.4316050 |
| C                                                                                                                                | 3.0254680  | -3.8591580 | -1.9482840 | C                                                                                                                                | 1.7009470  | -0.4843910 | -4.7267710 |
| H                                                                                                                                | 3.9665310  | -3.3460030 | -1.7302240 | H                                                                                                                                | 2.2984740  | 0.4295220  | -4.6711420 |
| H                                                                                                                                | 3.1339110  | -4.9318600 | -1.7798540 | H                                                                                                                                | 2.2032200  | -1.2254050 | -5.3493140 |
| H                                                                                                                                | 2.7550550  | -3.6714570 | -2.9922960 | H                                                                                                                                | 0.7174770  | -0.2439880 | -5.1398960 |
| <b>Molecule 20</b>                                                                                                               |            |            |            | <b>Molecule conformer of 18 (from TS<sup>4</sup>)</b>                                                                            |            |            |            |
| <b>E</b> = -1407.28460921, <b>H (0K)</b> = -1406.883303,<br><b>H (298K)</b> = -1406.855866, <b>G (298K)</b> = -1406.943815<br>au |            |            |            | <b>E</b> = -1407.30784269, <b>H (0K)</b> = -1406.905033,<br><b>H (298K)</b> = -1406.878204, <b>G (298K)</b> = -1406.965219<br>au |            |            |            |
| Imaginary frequency = 0.                                                                                                         |            |            |            | Imaginary frequency = 0.                                                                                                         |            |            |            |
| C                                                                                                                                | 1.3300370  | 0.3262830  | 0.0496440  | C                                                                                                                                | -0.4831350 | -0.7616570 | 0.0604040  |
| O                                                                                                                                | -1.9312520 | -2.2204030 | -0.3310500 | O                                                                                                                                | 0.8818520  | -1.2028830 | -0.0846040 |
| C                                                                                                                                | -2.2560700 | -1.0227690 | 0.3439530  | C                                                                                                                                | 1.6206810  | -0.3610330 | -0.9691450 |
| C                                                                                                                                | -1.2587040 | 0.1048500  | -0.0417050 | C                                                                                                                                | 0.8210850  | 0.9548450  | -0.9693850 |
| N                                                                                                                                | 0.0625250  | -0.4034310 | -0.0253480 | N                                                                                                                                | -0.4489110 | 0.6160750  | -0.4866010 |
| C                                                                                                                                | 0.8190680  | -0.5492130 | 1.1892060  | C                                                                                                                                | -1.6152430 | 1.3402430  | -0.9400410 |
| F                                                                                                                                | -1.4648000 | 1.1657320  | 0.8241080  | F                                                                                                                                | 0.7701650  | 1.4918880  | -2.2387140 |
| F                                                                                                                                | -1.4994830 | 0.5885090  | -1.2957950 | F                                                                                                                                | 1.4322900  | 1.9442250  | -0.2225880 |
| C                                                                                                                                | -3.6834810 | -0.6240510 | 0.0299950  | C                                                                                                                                | 3.0625620  | -0.2612880 | -0.5361520 |
| C                                                                                                                                | -4.4336260 | 0.0978910  | 0.9652230  | C                                                                                                                                | 4.0747000  | -0.2537760 | -1.5013830 |
| C                                                                                                                                | -5.7404760 | 0.4916210  | 0.6718930  | C                                                                                                                                | 5.4134530  | -0.1335640 | -1.1215470 |
| C                                                                                                                                | -6.3093620 | 0.1640390  | -0.5608220 | C                                                                                                                                | 5.7480110  | -0.0305410 | 0.2295890  |
| C                                                                                                                                | -5.5637860 | -0.5558980 | -1.4980050 | C                                                                                                                                | 4.7395400  | -0.0449240 | 1.1982530  |



|                                                                                                                                                          |            |            |            |                                                                                                                                                              |            |            |            |
|----------------------------------------------------------------------------------------------------------------------------------------------------------|------------|------------|------------|--------------------------------------------------------------------------------------------------------------------------------------------------------------|------------|------------|------------|
| C                                                                                                                                                        | -4.2553150 | -0.9440900 | -1.2070230 | C                                                                                                                                                            | 3.4027770  | -0.1559810 | 0.8184850  |
| C                                                                                                                                                        | 1.3613950  | 1.8204210  | 0.2784540  | C                                                                                                                                                            | -0.7668510 | -0.8081550 | 1.5681910  |
| C                                                                                                                                                        | 1.8450070  | 2.3634310  | 1.4743280  | C                                                                                                                                                            | -0.9810190 | -2.0481540 | 2.1889950  |
| C                                                                                                                                                        | 1.9176810  | 3.7486840  | 1.6442190  | C                                                                                                                                                            | -1.1470670 | -2.1299560 | 3.5709540  |
| C                                                                                                                                                        | 1.5071560  | 4.6019230  | 0.6195540  | C                                                                                                                                                            | -1.1060780 | -0.9714800 | 4.3519790  |
| C                                                                                                                                                        | 1.0278240  | 4.0652240  | -0.5792130 | C                                                                                                                                                            | -0.8878650 | 0.2633580  | 3.7403280  |
| C                                                                                                                                                        | 0.9620950  | 2.6837390  | -0.7521650 | C                                                                                                                                                            | -0.7120740 | 0.3465650  | 2.3557830  |
| C                                                                                                                                                        | 2.4016480  | -0.2061050 | -0.8797120 | C                                                                                                                                                            | -1.4278110 | -1.6706440 | -0.7449560 |
| C                                                                                                                                                        | 2.0906270  | -1.1113290 | -1.9015480 | C                                                                                                                                                            | -2.8002780 | -1.7187490 | -0.4566970 |
| C                                                                                                                                                        | 3.0932810  | -1.5957690 | -2.7443810 | C                                                                                                                                                            | -3.6659340 | -2.4969830 | -1.2278260 |
| C                                                                                                                                                        | 4.4168180  | -1.1877500 | -2.5713780 | C                                                                                                                                                            | -3.1696160 | -3.2527680 | -2.2910950 |
| C                                                                                                                                                        | 4.7335200  | -0.2863930 | -1.5514080 | C                                                                                                                                                            | -1.8021220 | -3.2281900 | -2.5724020 |
| C                                                                                                                                                        | 3.7325000  | 0.2053610  | -0.7142160 | C                                                                                                                                                            | -0.9388430 | -2.4438790 | -1.8055610 |
| H                                                                                                                                                        | -2.1477550 | -1.1399870 | 1.4334550  | H                                                                                                                                                            | 1.5702900  | -0.7432780 | -1.9977830 |
| H                                                                                                                                                        | -1.0005980 | -2.4319370 | -0.1151590 | H                                                                                                                                                            | -1.5944720 | 1.4914420  | -2.0252250 |
| H                                                                                                                                                        | 0.4915060  | -0.0091030 | 2.0767270  | H                                                                                                                                                            | -2.5093770 | 0.7470070  | -0.7380160 |
| H                                                                                                                                                        | -3.9953340 | 0.3507970  | 1.9272490  | H                                                                                                                                                            | 3.8166710  | -0.3446880 | -2.5538750 |
| H                                                                                                                                                        | -6.3144460 | 1.0477960  | 1.4081320  | H                                                                                                                                                            | 6.1916080  | -0.1294860 | -1.8797910 |
| H                                                                                                                                                        | -7.3285520 | 0.4646030  | -0.7885100 | H                                                                                                                                                            | 6.7891690  | 0.0557470  | 0.5284120  |
| H                                                                                                                                                        | -6.0012890 | -0.8148890 | -2.4585640 | H                                                                                                                                                            | 4.9957750  | 0.0315360  | 2.2514700  |
| H                                                                                                                                                        | -3.6741080 | -1.5063480 | -1.9298980 | H                                                                                                                                                            | 2.6186770  | -0.1719830 | 1.5686140  |
| H                                                                                                                                                        | 2.1713900  | 1.7045420  | 2.2743630  | H                                                                                                                                                            | -1.0145490 | -2.9533740 | 1.5901990  |
| H                                                                                                                                                        | 2.2952690  | 4.1569340  | 2.5775810  | H                                                                                                                                                            | -1.3099280 | -3.0979530 | 4.0371930  |
| H                                                                                                                                                        | 1.5604130  | 5.6789620  | 0.7519110  | H                                                                                                                                                            | -1.2421120 | -1.0334930 | 5.4283860  |
| H                                                                                                                                                        | 0.7052370  | 4.7237820  | -1.3808590 | H                                                                                                                                                            | -0.8519640 | 1.1695760  | 4.3393260  |
| H                                                                                                                                                        | 0.5852710  | 2.2700460  | -1.6828520 | H                                                                                                                                                            | -0.5347990 | 1.3071070  | 1.8849820  |
| H                                                                                                                                                        | 1.0620810  | -1.4303490 | -2.0285280 | H                                                                                                                                                            | -3.1960750 | -1.1627750 | 0.3884640  |
| H                                                                                                                                                        | 2.8363280  | -2.2921820 | -3.5379960 | H                                                                                                                                                            | -4.7254170 | -2.5185320 | -0.9881940 |
| H                                                                                                                                                        | 5.1961840  | -1.5661680 | -3.2271270 | H                                                                                                                                                            | -3.8405350 | -3.8639080 | -2.8883410 |
| H                                                                                                                                                        | 5.7606320  | 0.0384610  | -1.4091520 | H                                                                                                                                                            | -1.4020690 | -3.8257130 | -3.3870110 |
| H                                                                                                                                                        | 3.9848700  | 0.9156950  | 0.0678160  | H                                                                                                                                                            | 0.1234750  | -2.4533310 | -2.0204520 |
| C                                                                                                                                                        | 1.3167790  | -1.9457710 | 1.4497530  | C                                                                                                                                                            | -1.8173330 | 2.7074350  | -0.2855830 |
| O                                                                                                                                                        | 0.8588710  | -2.9405400 | 0.9163450  | O                                                                                                                                                            | -1.1913270 | 3.1721850  | 0.6423950  |
| O                                                                                                                                                        | 2.2982560  | -1.9491880 | 2.3535540  | O                                                                                                                                                            | -2.8298810 | 3.3395140  | -0.9044190 |
| C                                                                                                                                                        | 2.8340960  | -3.2441080 | 2.7092770  | C                                                                                                                                                            | -3.1710130 | 4.6433750  | -0.3909540 |
| H                                                                                                                                                        | 3.2704730  | -3.7234520 | 1.8305270  | H                                                                                                                                                            | -2.3170040 | 5.3193840  | -0.4748870 |
| H                                                                                                                                                        | 3.5986380  | -3.0440320 | 3.4584360  | H                                                                                                                                                            | -3.9975140 | 4.9921550  | -1.0091190 |
| H                                                                                                                                                        | 2.0453990  | -3.8776230 | 3.1207320  | H                                                                                                                                                            | -3.4778930 | 4.5718820  | 0.6551970  |
| <b>Molecule 21</b>                                                                                                                                       |            |            |            | <b>TS<sup>9</sup></b>                                                                                                                                        |            |            |            |
| <b>E</b> = -635.31460004, <b>H (0K)</b> = -635.055443,<br><b>H (298K)</b> = -635.040588, <b>G (298K)</b> = -635.096783<br>au<br>Imaginary frequency = 0. |            |            |            | <b>E</b> = -1179.35084247, <b>H (0K)</b> = -1178.997787,<br><b>H (298K)</b> = -1178.975725, <b>G (298K)</b> = -1179.049784<br>au<br>Imaginary frequency = 1. |            |            |            |
| C                                                                                                                                                        | 0.0052580  | 0.6875490  | 0.0228420  | C                                                                                                                                                            | -1.4339680 | -0.0536740 | 0.4081140  |
| C                                                                                                                                                        | 0.9224790  | 2.8452100  | -0.5689350 | O                                                                                                                                                            | 1.4168590  | -2.1905820 | -0.3704450 |
| N                                                                                                                                                        | -0.0292980 | 2.0603900  | -0.0604290 | C                                                                                                                                                            | 1.6497740  | -0.8312210 | -0.4320200 |
| C                                                                                                                                                        | -1.1771670 | 2.8019370  | 0.5312650  | C                                                                                                                                                            | 1.0148400  | -0.0359030 | 0.7851800  |
| C                                                                                                                                                        | 1.3043570  | -0.0099780 | -0.0542690 | N                                                                                                                                                            | -0.3641180 | -0.5526020 | 1.0422640  |
| C                                                                                                                                                        | 1.4474120  | -1.1929590 | -0.8083820 | C                                                                                                                                                            | -0.2245040 | -1.8794100 | 1.5530620  |
| C                                                                                                                                                        | 2.6460970  | -1.9088220 | -0.8212090 | F                                                                                                                                                            | 1.0259120  | 1.2788690  | 0.4835050  |
| C                                                                                                                                                        | 3.7453120  | -1.4611290 | -0.0881770 | F                                                                                                                                                            | 1.7351680  | -0.1730730 | 1.9272050  |
| C                                                                                                                                                        | 3.6261660  | -0.2853410 | 0.6644540  | C                                                                                                                                                            | 3.1367940  | -0.4829000 | -0.4983340 |
| C                                                                                                                                                        | 2.4317770  | 0.4260800  | 0.6804270  | C                                                                                                                                                            | 3.5736750  | 0.6795950  | -1.1436890 |
| C                                                                                                                                                        | -1.2448380 | -0.0787030 | 0.0406450  | C                                                                                                                                                            | 4.9341530  | 0.9912070  | -1.1969260 |
| C                                                                                                                                                        | -1.3492130 | -1.2661260 | 0.8049230  | C                                                                                                                                                            | 5.8700080  | 0.1421640  | -0.6020670 |
| C                                                                                                                                                        | -2.5238080 | -2.0106170 | 0.8335460  | C                                                                                                                                                            | 5.4381830  | -1.0209090 | 0.0421910  |
| C                                                                                                                                                        | -3.6473590 | -1.5980580 | 0.1067170  | C                                                                                                                                                            | 4.0789480  | -1.3313040 | 0.0929620  |
| C                                                                                                                                                        | -3.5655930 | -0.4358020 | -0.6625090 | C                                                                                                                                                            | -2.5564250 | -0.9501300 | 0.0506690  |
| C                                                                                                                                                        | -2.3828960 | 0.3025490  | -0.7078280 | C                                                                                                                                                            | -3.8831860 | -0.5750570 | 0.3280970  |
| H                                                                                                                                                        | -0.7666280 | 3.5794420  | 1.1785930  | C                                                                                                                                                            | -4.9452990 | -1.3862890 | -0.0683120 |
| H                                                                                                                                                        | -1.7919800 | 2.1271830  | 1.1193950  | C                                                                                                                                                            | -4.7001370 | -2.5696710 | -0.7685790 |

|                                                          |            |            |            |                                                          |            |            |            |
|----------------------------------------------------------|------------|------------|------------|----------------------------------------------------------|------------|------------|------------|
| H                                                        | -1.7716240 | 3.2682440  | -0.2559770 | C                                                        | -3.3854880 | -2.9432220 | -1.0657020 |
| H                                                        | 0.6028000  | -1.5545490 | -1.3874120 | C                                                        | -2.3200280 | -2.1480920 | -0.6525190 |
| H                                                        | 2.7200410  | -2.8159740 | -1.4161500 | C                                                        | -1.6005680 | 1.3882790  | 0.1299350  |
| H                                                        | 4.6806710  | -2.0138430 | -0.1011100 | C                                                        | -1.3805800 | 2.3498160  | 1.1355370  |
| H                                                        | 4.4692900  | 0.0723320  | 1.2506640  | C                                                        | -1.6388090 | 3.6969450  | 0.8946410  |
| H                                                        | 2.3625230  | 1.3348070  | 1.2723890  | C                                                        | -2.1187120 | 4.1091670  | -0.3515750 |
| H                                                        | -0.4933330 | -1.5931650 | 1.3881770  | C                                                        | -2.3506460 | 3.1633390  | -1.3540830 |
| H                                                        | -2.5693200 | -2.9132310 | 1.4382140  | C                                                        | -2.1062810 | 1.8132700  | -1.1128390 |
| H                                                        | -4.5655630 | -2.1782010 | 0.1345290  | H                                                        | 1.1386250  | -0.3679110 | -1.2970740 |
| H                                                        | -4.4202940 | -0.1104410 | -1.2508630 | H                                                        | 0.6727370  | -2.3355120 | 0.5066370  |
| H                                                        | -2.3291800 | 1.1749360  | -1.3529330 | H                                                        | -1.1815110 | -2.3754140 | 1.6738730  |
| H                                                        | 0.8802890  | 3.9057210  | -0.3690630 | H                                                        | 0.3805350  | -1.8635720 | 2.4563630  |
| H                                                        | 1.7694900  | 2.3992730  | -1.0665030 | H                                                        | 2.8491030  | 1.3414860  | -1.6117250 |
|                                                          |            |            |            | H                                                        | 5.2619100  | 1.8933510  | -1.7068370 |
|                                                          |            |            |            | H                                                        | 6.9292940  | 0.3812290  | -0.6458500 |
|                                                          |            |            |            | H                                                        | 6.1622080  | -1.6885510 | 0.5023070  |
|                                                          |            |            |            | H                                                        | 3.7326420  | -2.2406810 | 0.5729620  |
|                                                          |            |            |            | H                                                        | -4.0767400 | 0.3498200  | 0.8624650  |
|                                                          |            |            |            | H                                                        | -5.9641360 | -1.0914080 | 0.1659320  |
|                                                          |            |            |            | H                                                        | -5.5285510 | -3.1975970 | -1.0840870 |
|                                                          |            |            |            | H                                                        | -3.1901430 | -3.8557950 | -1.6215140 |
|                                                          |            |            |            | H                                                        | -1.2995270 | -2.4395250 | -0.8843440 |
|                                                          |            |            |            | H                                                        | -1.0249100 | 2.0314580  | 2.1105740  |
|                                                          |            |            |            | H                                                        | -1.4717690 | 4.4250640  | 1.6832700  |
|                                                          |            |            |            | H                                                        | -2.3188600 | 5.1605820  | -0.5374660 |
|                                                          |            |            |            | H                                                        | -2.7247260 | 3.4770270  | -2.3244440 |
|                                                          |            |            |            | H                                                        | -2.2924050 | 1.0806670  | -1.8921710 |
| <b>TS<sup>10</sup></b>                                   |            |            |            | <b>Molecule 22</b>                                       |            |            |            |
| <b>E = -980.89552844, H (0K) = -980.524247,</b>          |            |            |            | <b>E = -980.95066503, H (0K) = -980.574242,</b>          |            |            |            |
| <b>H (298K) = -980.502442, G (298K) = -980.576489 au</b> |            |            |            | <b>H (298K) = -980.553736, G (298K) = -980.623599 au</b> |            |            |            |
| Imaginary frequency = 1.                                 |            |            |            | Imaginary frequency = 0.                                 |            |            |            |
| O                                                        | -0.5618450 | -1.4020320 | -1.0840910 | C                                                        | 0.7894640  | -0.2037120 | 0.3318700  |
| C                                                        | -1.4933230 | -1.7287710 | -0.3208070 | O                                                        | -0.3018580 | -0.7793810 | -0.4539300 |
| C                                                        | -0.8459240 | -0.7341400 | 1.6679290  | C                                                        | -1.3305480 | -1.2553330 | 0.4290400  |
| N                                                        | 0.4946480  | -0.8604150 | 1.4312540  | C                                                        | -0.9181140 | -0.6495240 | 1.7911670  |
| C                                                        | 1.0813380  | -2.1224610 | 1.9357680  | N                                                        | 0.5476620  | -0.6066410 | 1.7255970  |
| C                                                        | -2.8498070 | -1.1063830 | -0.3800610 | C                                                        | 1.1603520  | -1.8696210 | 2.1639750  |
| C                                                        | -3.9236820 | -1.6786480 | 0.3176540  | C                                                        | -2.7144870 | -0.8755350 | -0.0447030 |
| C                                                        | -5.1998390 | -1.1217990 | 0.2361590  | C                                                        | -3.7645690 | -1.7929690 | 0.0886420  |
| C                                                        | -5.4177810 | 0.0151610  | -0.5481790 | C                                                        | -5.0658140 | -1.4494810 | -0.2843840 |
| C                                                        | -4.3525110 | 0.5877770  | -1.2519270 | C                                                        | -5.3309600 | -0.1823780 | -0.8072910 |
| C                                                        | -3.0780480 | 0.0294210  | -1.1715390 | C                                                        | -4.2873950 | 0.7362890  | -0.9521550 |
| C                                                        | 0.7720830  | 1.3447730  | 0.3910700  | C                                                        | -2.9890870 | 0.3940200  | -0.5723310 |
| C                                                        | 0.7894750  | 1.8814730  | -0.9081280 | C                                                        | 0.7128200  | 1.3286720  | 0.1895660  |
| C                                                        | 0.4641140  | 3.2190230  | -1.1337470 | C                                                        | 0.4851870  | 1.8910870  | -1.0753090 |
| C                                                        | 0.1205330  | 4.0502510  | -0.0652270 | C                                                        | 0.4533720  | 3.2753030  | -1.2420000 |
| C                                                        | 0.1076460  | 3.5319700  | 1.2335350  | C                                                        | 0.6516900  | 4.1207610  | -0.1457310 |
| C                                                        | 0.4298350  | 2.1955450  | 1.4602710  | C                                                        | 0.8827050  | 3.5685410  | 1.1143010  |
| C                                                        | 2.5029020  | -0.4817730 | 0.0482270  | C                                                        | 0.9166080  | 2.1802690  | 1.2802410  |
| C                                                        | 3.6415100  | 0.3337230  | 0.2036520  | C                                                        | 2.1208650  | -0.7106660 | -0.2314880 |
| C                                                        | 4.8687600  | -0.0423290 | -0.3387810 | C                                                        | 3.3288500  | -0.1402550 | 0.1969150  |
| C                                                        | 4.9838580  | -1.2352750 | -1.0587130 | C                                                        | 4.5481180  | -0.6088990 | -0.2913530 |
| C                                                        | 3.8577580  | -2.0420280 | -1.2403190 | C                                                        | 4.5781590  | -1.6460920 | -1.2280590 |
| C                                                        | 2.6275260  | -1.6686420 | -0.6998940 | C                                                        | 3.3799130  | -2.2103220 | -1.6663730 |
| H                                                        | -1.4786120 | -2.7109100 | 0.1918100  | C                                                        | 2.1580950  | -1.7480190 | -1.1691660 |
| H                                                        | 0.6693950  | -2.3092010 | 2.9282580  | H                                                        | -1.2656150 | -2.3514370 | 0.4791460  |
| H                                                        | 2.1629280  | -2.0314250 | 2.0011260  | H                                                        | 0.8527800  | -2.0472420 | 3.1986220  |
| H                                                        | 0.8190730  | -2.9501810 | 1.2738340  | H                                                        | 2.2476850  | -1.7819900 | 2.1451560  |
| H                                                        | -3.7532360 | -2.5657010 | 0.9251570  | H                                                        | 0.8771540  | -2.7477780 | 1.5625560  |
| H                                                        | -6.0249540 | -1.5744220 | 0.7801320  | H                                                        | -3.5614800 | -2.7853190 | 0.4857160  |
| H                                                        | -6.4115560 | 0.4501530  | -0.6134650 | H                                                        | -5.8681970 | -2.1741990 | -0.1741320 |

|                                                                                                                                                       |            |            |            |                                                                                                                                                       |            |            |            |
|-------------------------------------------------------------------------------------------------------------------------------------------------------|------------|------------|------------|-------------------------------------------------------------------------------------------------------------------------------------------------------|------------|------------|------------|
| H                                                                                                                                                     | -4.5199280 | 1.4687470  | -1.8665930 | H                                                                                                                                                     | -6.3410190 | 0.0860160  | -1.1050960 |
| H                                                                                                                                                     | -2.2424850 | 0.4588320  | -1.7162290 | H                                                                                                                                                     | -4.4848710 | 1.7224080  | -1.3646420 |
| H                                                                                                                                                     | 1.0484890  | 1.2350900  | -1.7406880 | H                                                                                                                                                     | -2.1805500 | 1.1078390  | -0.6954940 |
| H                                                                                                                                                     | 0.4761000  | 3.6108620  | -2.1473500 | H                                                                                                                                                     | 0.3273830  | 1.2377450  | -1.9279950 |
| H                                                                                                                                                     | -0.1322040 | 5.0922840  | -0.2405980 | H                                                                                                                                                     | 0.2737730  | 3.6950270  | -2.2283980 |
| H                                                                                                                                                     | -0.1452700 | 4.1730690  | 2.0738850  | H                                                                                                                                                     | 0.6264400  | 5.1994100  | -0.2754820 |
| H                                                                                                                                                     | 0.4247540  | 1.8058800  | 2.4746070  | H                                                                                                                                                     | 1.0370260  | 4.2159220  | 1.9737750  |
| H                                                                                                                                                     | 3.5599140  | 1.2610390  | 0.7634660  | H                                                                                                                                                     | 1.0913510  | 1.7456890  | 2.2589910  |
| H                                                                                                                                                     | 5.7373640  | 0.5953280  | -0.1973740 | H                                                                                                                                                     | 3.3151810  | 0.6760850  | 0.9132090  |
| H                                                                                                                                                     | 5.9404600  | -1.5269330 | -1.4836740 | H                                                                                                                                                     | 5.4747230  | -0.1586500 | 0.0546450  |
| H                                                                                                                                                     | 3.9325380  | -2.9581800 | -1.8204470 | H                                                                                                                                                     | 5.5276500  | -2.0060290 | -1.6150580 |
| H                                                                                                                                                     | 1.7367980  | -2.2580650 | -0.8882920 | H                                                                                                                                                     | 3.3910210  | -3.0133270 | -2.3987940 |
| H                                                                                                                                                     | -1.2306620 | -1.2784760 | 2.5216320  | H                                                                                                                                                     | 1.2269070  | -2.1835480 | -1.5118820 |
| H                                                                                                                                                     | -1.2973750 | 0.2160420  | 1.4302680  | H                                                                                                                                                     | -1.2607460 | -1.2348980 | 2.6469620  |
|                                                                                                                                                       |            |            |            | H                                                                                                                                                     | -1.3167080 | 0.3669950  | 1.8782070  |
| <b>TS11</b>                                                                                                                                           |            |            |            | <b>Molecule 23</b>                                                                                                                                    |            |            |            |
| <b>E</b> = -980.89381064, <b>H (0K)</b> = -980.521684,<br><b>H (298K)</b> = -980.500322, <b>G (298K)</b> = -980.572869 au<br>Imaginary frequency = 1. |            |            |            | <b>E</b> = -980.89976328, <b>H (0K)</b> = -980.525301,<br><b>H (298K)</b> = -980.504207, <b>G (298K)</b> = -980.575609 au<br>Imaginary frequency = 0. |            |            |            |
| C                                                                                                                                                     | -1.3346680 | 0.0339230  | 0.5316470  | C                                                                                                                                                     | -1.3279520 | 0.0078930  | 0.5553050  |
| O                                                                                                                                                     | 1.4610080  | -2.0541250 | -0.6786160 | O                                                                                                                                                     | 1.3544890  | -2.2258440 | -0.3870720 |
| C                                                                                                                                                     | 1.8320520  | -0.8501860 | -0.6820150 | C                                                                                                                                                     | 1.6292310  | -0.9347330 | -0.3138920 |
| C                                                                                                                                                     | 1.0375040  | 0.1950290  | 1.0097950  | C                                                                                                                                                     | 1.0625630  | -0.1843510 | 1.0438450  |
| N                                                                                                                                                     | -0.2093800 | -0.4005040 | 1.1174760  | N                                                                                                                                                     | -0.3288760 | -0.5836090 | 1.1897420  |
| C                                                                                                                                                     | -0.1451970 | -1.7096080 | 1.8047830  | C                                                                                                                                                     | -0.4243130 | -1.9117500 | 1.8163140  |
| C                                                                                                                                                     | 3.2702660  | -0.4760710 | -0.4614410 | C                                                                                                                                                     | 3.1263640  | -0.5630590 | -0.3388520 |
| C                                                                                                                                                     | 3.7385970  | 0.8065800  | -0.7811810 | C                                                                                                                                                     | 3.5693940  | 0.7236910  | -0.6721810 |
| C                                                                                                                                                     | 5.0802240  | 1.1397670  | -0.5927630 | C                                                                                                                                                     | 4.9322710  | 1.0307800  | -0.6826710 |
| C                                                                                                                                                     | 5.9715890  | 0.1912400  | -0.0817740 | C                                                                                                                                                     | 5.8728550  | 0.0494040  | -0.3562220 |
| C                                                                                                                                                     | 5.5132110  | -1.0924920 | 0.2327980  | C                                                                                                                                                     | 5.4396770  | -1.2388980 | -0.0278600 |
| C                                                                                                                                                     | 4.1726960  | -1.4242370 | 0.0408000  | C                                                                                                                                                     | 4.0764530  | -1.5396790 | -0.0230350 |
| C                                                                                                                                                     | -2.4055240 | -0.9118890 | 0.1610380  | C                                                                                                                                                     | -2.5108410 | -0.7666800 | 0.1290670  |
| C                                                                                                                                                     | -3.7555510 | -0.6011640 | 0.4173460  | C                                                                                                                                                     | -3.8137220 | -0.2776280 | 0.3292880  |
| C                                                                                                                                                     | -4.7696810 | -1.4784910 | 0.0408320  | C                                                                                                                                                     | -4.9104630 | -1.0031610 | -0.1303480 |
| C                                                                                                                                                     | -4.4584740 | -2.6763110 | -0.6104300 | C                                                                                                                                                     | -4.7177390 | -2.2048030 | -0.8187760 |
| C                                                                                                                                                     | -3.1247530 | -2.9876630 | -0.8872370 | C                                                                                                                                                     | -3.4239970 | -2.6838650 | -1.0447960 |
| C                                                                                                                                                     | -2.1044170 | -2.1149420 | -0.5114030 | C                                                                                                                                                     | -2.3220070 | -1.9756450 | -0.5708390 |
| C                                                                                                                                                     | -1.5016210 | 1.4679640  | 0.2019470  | C                                                                                                                                                     | -1.2812370 | 1.4544180  | 0.2429280  |
| C                                                                                                                                                     | -1.1973970 | 2.4732310  | 1.1428600  | C                                                                                                                                                     | -0.8929700 | 2.3863030  | 1.2249770  |
| C                                                                                                                                                     | -1.4251040 | 3.8146300  | 0.8504610  | C                                                                                                                                                     | -0.9165770 | 3.7508290  | 0.9496960  |
| C                                                                                                                                                     | -1.9585210 | 4.1865220  | -0.3886990 | C                                                                                                                                                     | -1.3200960 | 4.2069370  | -0.3090980 |
| C                                                                                                                                                     | -2.2703850 | 3.2017800  | -1.3274780 | C                                                                                                                                                     | -1.7149250 | 3.2911560  | -1.2871160 |
| C                                                                                                                                                     | -2.0499610 | 1.8557290  | -1.0341450 | C                                                                                                                                                     | -1.7084410 | 1.9249800  | -1.0113440 |
| H                                                                                                                                                     | 1.2819490  | -0.1200900 | -1.3125310 | H                                                                                                                                                     | 1.1193170  | -0.3056740 | -1.0963570 |
| H                                                                                                                                                     | 0.4558040  | -2.3876380 | 1.1933710  | H                                                                                                                                                     | 0.2109730  | -2.5735560 | 1.2066390  |
| H                                                                                                                                                     | -1.1446880 | -2.1053490 | 1.9634550  | H                                                                                                                                                     | -1.4559020 | -2.2510920 | 1.8633180  |
| H                                                                                                                                                     | 0.3439120  | -1.5448850 | 2.7677180  | H                                                                                                                                                     | -0.0133310 | -1.8213550 | 2.8258960  |
| H                                                                                                                                                     | 3.0468330  | 1.5433080  | -1.1859220 | H                                                                                                                                                     | 2.8426370  | 1.4900780  | -0.9396790 |
| H                                                                                                                                                     | 5.4325530  | 2.1359670  | -0.8479960 | H                                                                                                                                                     | 5.2610090  | 2.0323490  | -0.9503510 |
| H                                                                                                                                                     | 7.0172410  | 0.4488140  | 0.0645880  | H                                                                                                                                                     | 6.9341710  | 0.2849000  | -0.3660890 |
| H                                                                                                                                                     | 6.2051180  | -1.8352890 | 0.6222400  | H                                                                                                                                                     | 6.1670850  | -2.0096080 | 0.2176090  |
| H                                                                                                                                                     | 3.8022060  | -2.4200950 | 0.2651170  | H                                                                                                                                                     | 3.7128030  | -2.5371210 | 0.2054400  |
| H                                                                                                                                                     | -4.0025970 | 0.3270190  | 0.9242140  | H                                                                                                                                                     | -3.9619350 | 0.6601500  | 0.8559350  |
| H                                                                                                                                                     | -5.8047620 | -1.2288750 | 0.2574370  | H                                                                                                                                                     | -5.9152520 | -0.6292450 | 0.0430690  |
| H                                                                                                                                                     | -5.2512870 | -3.3572940 | -0.9073430 | H                                                                                                                                                     | -5.5747580 | -2.7627050 | -1.1853560 |
| H                                                                                                                                                     | -2.8774950 | -3.9074250 | -1.4104660 | H                                                                                                                                                     | -3.2728690 | -3.6074250 | -1.5959900 |
| H                                                                                                                                                     | -1.0682440 | -2.3381270 | -0.7543360 | H                                                                                                                                                     | -1.3079080 | -2.3246780 | -0.7553340 |
| H                                                                                                                                                     | -0.7916000 | 2.1947230  | 2.1112890  | H                                                                                                                                                     | -0.5946500 | 2.0370740  | 2.2091620  |
| H                                                                                                                                                     | -1.1943160 | 4.5726670  | 1.5939240  | H                                                                                                                                                     | -0.6265980 | 4.4594510  | 1.7199460  |
| H                                                                                                                                                     | -2.1328680 | 5.2344690  | -0.6157100 | H                                                                                                                                                     | -1.3330770 | 5.2717450  | -0.5230320 |
| H                                                                                                                                                     | -2.6855710 | 3.4793390  | -2.2924110 | H                                                                                                                                                     | -2.0310930 | 3.6399500  | -2.2657960 |

|                                                                                                                                             |            |            |            |                                                                                                                                             |            |            |            |
|---------------------------------------------------------------------------------------------------------------------------------------------|------------|------------|------------|---------------------------------------------------------------------------------------------------------------------------------------------|------------|------------|------------|
| H                                                                                                                                           | -2.2966360 | 1.0953320  | -1.7687480 | H                                                                                                                                           | -2.0175090 | 1.2158910  | -1.7726110 |
| H                                                                                                                                           | 1.0464750  | 1.2144530  | 0.6492080  | H                                                                                                                                           | 1.1635240  | 0.8903580  | 0.9250020  |
| H                                                                                                                                           | 1.7062760  | -0.0245280 | 1.8350580  | H                                                                                                                                           | 1.6184110  | -0.5202970 | 1.9206170  |
| <b>TS12</b>                                                                                                                                 |            |            |            | <b>Molecule 24</b>                                                                                                                          |            |            |            |
| <b>E = -980.89371573, H (0K) = -980.519846,</b><br><b>H (298K) = -980.499166, G (298K) = -980.570250 au</b><br>Imaginary frequency = 1.     |            |            |            | <b>E = -1179.35507325, H (0K) = -1178.998883,</b><br><b>H (298K) = -1178.975590, G (298K) = -1179.052749 au</b><br>Imaginary frequency = 0. |            |            |            |
| C                                                                                                                                           | -1.2373090 | -0.0102110 | 0.5262070  | C                                                                                                                                           | -1.4172690 | -0.0242910 | 0.3159620  |
| O                                                                                                                                           | 1.0831330  | -0.9696230 | -1.1282650 | O                                                                                                                                           | 1.6665040  | -2.3949670 | 0.1592840  |
| C                                                                                                                                           | 1.6972260  | 0.0573020  | -0.5836080 | C                                                                                                                                           | 1.6529150  | -1.0288850 | -0.2073710 |
| C                                                                                                                                           | 1.0939930  | 0.4795030  | 0.9632740  | C                                                                                                                                           | 1.0077970  | -0.1481490 | 0.9016670  |
| N                                                                                                                                           | -0.1161010 | -0.2905770 | 1.1565310  | C                                                                                                                                           | 1.0077970  | -0.1481490 | 0.9016670  |
| C                                                                                                                                           | 0.1712550  | -1.6422960 | 1.6603000  | N                                                                                                                                           | -0.4258290 | -0.5265020 | 1.1429930  |
| C                                                                                                                                           | 3.2148070  | -0.0827380 | -0.3670390 | C                                                                                                                                           | -0.5870030 | -1.5453760 | 2.0017450  |
| C                                                                                                                                           | 4.0164970  | 1.0164070  | -0.0275950 | F                                                                                                                                           | 1.0950890  | 1.1405920  | 0.5156280  |
| C                                                                                                                                           | 5.3917890  | 0.8681280  | 0.1643040  | F                                                                                                                                           | 1.6764190  | -0.2720480 | 2.0730410  |
| C                                                                                                                                           | 5.9884650  | -0.3877980 | 0.0138110  | C                                                                                                                                           | 3.0765180  | -0.5825790 | -0.4755580 |
| C                                                                                                                                           | 5.1988240  | -1.4868350 | -0.3359680 | C                                                                                                                                           | 3.3430150  | 0.3265040  | -1.5050110 |
| C                                                                                                                                           | 3.8238970  | -1.3312270 | -0.5273620 | C                                                                                                                                           | 4.6496370  | 0.7533330  | -1.7486490 |
| C                                                                                                                                           | -2.2627250 | -1.0424520 | 0.2434800  | C                                                                                                                                           | 5.6996340  | 0.2720180  | -0.9640740 |
| C                                                                                                                                           | -3.5828830 | -0.8686880 | 0.6931570  | C                                                                                                                                           | 5.4374340  | -0.6359330 | 0.0653980  |
| C                                                                                                                                           | -4.5531720 | -1.8233100 | 0.3947790  | C                                                                                                                                           | 4.1314300  | -1.0594200 | 0.3126470  |
| C                                                                                                                                           | -4.2239720 | -2.9372730 | -0.3831310 | C                                                                                                                                           | -2.5253150 | -0.9256920 | -0.0753420 |
| C                                                                                                                                           | -2.9206660 | -3.0962050 | -0.8613480 | C                                                                                                                                           | -3.8699340 | -0.5234180 | 0.0394800  |
| C                                                                                                                                           | -1.9379710 | -2.1572120 | -0.5509310 | C                                                                                                                                           | -4.9131760 | -1.3402030 | -0.4041670 |
| C                                                                                                                                           | -1.5556500 | 1.3834200  | 0.1292290  | C                                                                                                                                           | -4.6444430 | -2.5874640 | -0.9662020 |
| C                                                                                                                                           | -1.4934990 | 2.4321900  | 1.0641080  | C                                                                                                                                           | -3.3128940 | -3.0077480 | -1.0876180 |
| C                                                                                                                                           | -1.8618750 | 3.7238410  | 0.6938060  | C                                                                                                                                           | -2.2761040 | -2.1915700 | -0.6527320 |
| C                                                                                                                                           | -2.2832090 | 3.9861270  | -0.6129150 | C                                                                                                                                           | -1.5646740 | 1.4264790  | 0.1329770  |
| C                                                                                                                                           | -2.3507310 | 2.9480510  | -1.5452930 | C                                                                                                                                           | -1.2946690 | 2.3454470  | 1.1710480  |
| C                                                                                                                                           | -2.0043250 | 1.6497960  | -1.1743720 | C                                                                                                                                           | -1.4798860 | 3.7146860  | 0.9898140  |
| H                                                                                                                                           | 1.5419080  | 1.0316500  | -1.1178910 | C                                                                                                                                           | -1.9617410 | 4.2095350  | -0.2248440 |
| H                                                                                                                                           | 0.7430230  | -2.1499940 | 0.8769260  | C                                                                                                                                           | -2.2549790 | 3.3132950  | -1.2583500 |
| H                                                                                                                                           | -0.7494200 | -2.1777280 | 1.8812910  | C                                                                                                                                           | -2.0587210 | 1.9460780  | -1.0839210 |
| H                                                                                                                                           | 0.7713460  | -1.5422900 | 2.5668840  | H                                                                                                                                           | 1.0357610  | -0.8558160 | -1.0993930 |
| H                                                                                                                                           | 3.5622100  | 2.0011860  | 0.0778690  | H                                                                                                                                           | 0.7511480  | -2.7019990 | 0.2726390  |
| H                                                                                                                                           | 5.9996630  | 1.7316530  | 0.4249830  | H                                                                                                                                           | -1.5917360 | -1.8809000 | 2.2062500  |
| H                                                                                                                                           | 7.0595800  | -0.5052560 | 0.1584780  | H                                                                                                                                           | 0.2748640  | -2.0545070 | 2.3998460  |
| H                                                                                                                                           | 5.6580110  | -2.4644620 | -0.4667980 | H                                                                                                                                           | 2.5282100  | 0.6991620  | -2.1203610 |
| H                                                                                                                                           | 3.1906710  | -2.1633330 | -0.8211380 | H                                                                                                                                           | 4.8459510  | 1.4561640  | -2.5535080 |
| H                                                                                                                                           | -3.8410040 | 0.0036390  | 1.2863490  | H                                                                                                                                           | 6.7177060  | 0.5999740  | -1.1554080 |
| H                                                                                                                                           | -5.5672100 | -1.6938660 | 0.7616840  | H                                                                                                                                           | 6.2510750  | -1.0147070 | 0.6779020  |
| H                                                                                                                                           | -4.9852670 | -3.6736080 | -0.6251630 | H                                                                                                                                           | 3.9270570  | -1.7677060 | 1.1083490  |
| H                                                                                                                                           | -2.6694230 | -3.9496230 | -1.4847590 | H                                                                                                                                           | -4.0962980 | 0.4429150  | 0.4796990  |
| H                                                                                                                                           | -0.9259600 | -2.2360990 | -0.9364850 | H                                                                                                                                           | -5.9400480 | -0.9989700 | -0.2994830 |
| H                                                                                                                                           | -1.1754910 | 2.2280650  | 2.0824300  | H                                                                                                                                           | -5.4545210 | -3.2251150 | -1.3087910 |
| H                                                                                                                                           | -1.8235080 | 4.5246600  | 1.4264710  | H                                                                                                                                           | -3.0844300 | -3.9706340 | -1.5373830 |
| H                                                                                                                                           | -2.5641400 | 4.9951270  | -0.9008300 | H                                                                                                                                           | -1.2506380 | -2.5331000 | -0.7742980 |
| H                                                                                                                                           | -2.6788060 | 3.1471130  | -2.5612440 | H                                                                                                                                           | -0.9474440 | 1.9749060  | 2.1316510  |
| H                                                                                                                                           | -2.0609170 | 0.8411670  | -1.8960960 | H                                                                                                                                           | -1.2623510 | 4.3968700  | 1.8079870  |
| H                                                                                                                                           | 0.8967800  | 1.5468910  | 0.9771590  | H                                                                                                                                           | -2.1131130 | 5.2765590  | -0.3629210 |
| H                                                                                                                                           | 1.7929930  | 0.2250230  | 1.7589230  | H                                                                                                                                           | -2.6296920 | 3.6833360  | -2.2094830 |
|                                                                                                                                             |            |            |            | H                                                                                                                                           | -2.2817290 | 1.2620330  | -1.8979310 |
| <b>TS1'</b>                                                                                                                                 |            |            |            | <b>Molecule 13'</b>                                                                                                                         |            |            |            |
| <b>E = -1179.34788299, H (0K) = -1178.992091,</b><br><b>H (298K) = -1178.969137, G (298K) = -1179.043830 au</b><br>Imaginary frequency = 1. |            |            |            | <b>E = -1179.44326484, H (0K) = -1179.082557,</b><br><b>H (298K) = -1179.060625, G (298K) = -1179.132622 au</b><br>Imaginary frequency = 0. |            |            |            |
| C                                                                                                                                           | 1.0553330  | 0.0698160  | 0.5458950  | C                                                                                                                                           | 0.5209640  | -0.0391690 | 0.0972390  |
| O                                                                                                                                           | -0.3903170 | 2.3761980  | -0.9207810 | O                                                                                                                                           | 0.1526110  | 2.1992210  | -0.6087250 |

|                                                  |            |            |            |   |            |            |            |
|--------------------------------------------------|------------|------------|------------|---|------------|------------|------------|
| C                                                | -0.5530470 | 1.2351840  | -1.4407040 | C | -0.2782570 | 0.8531770  | -0.9349830 |
| C                                                | -0.0092990 | 2.1482220  | 1.0963870  | C | 0.6713950  | 2.2311000  | 0.6539180  |
| N                                                | 1.0911550  | 1.3995820  | 1.0207460  | N | 0.6023830  | 0.9403830  | 1.2097680  |
| C                                                | 2.3565220  | 2.1565600  | 1.2127400  | C | 1.4551080  | 0.6900270  | 2.3696210  |
| F                                                | -1.1722360 | 1.6006600  | 1.3669470  | F | -0.0045130 | 3.1471570  | 1.4281790  |
| F                                                | 0.0854060  | 3.3614170  | 1.6046350  | F | 1.9473520  | 2.7565480  | 0.6008290  |
| C                                                | -1.8491960 | 0.5573560  | -1.5389060 | C | -1.7919100 | 0.7685550  | -0.9347720 |
| C                                                | -1.9348500 | -0.6737360 | -2.2150020 | C | -2.4255480 | -0.0498070 | -1.8781740 |
| C                                                | -3.1617490 | -1.3169980 | -2.3672160 | C | -3.8170480 | -0.1497410 | -1.9157630 |
| C                                                | -4.3226180 | -0.7380080 | -1.8473000 | C | -4.5937960 | 0.5816190  | -1.0151500 |
| C                                                | -4.2499720 | 0.4904600  | -1.1780210 | C | -3.9694980 | 1.4125230  | -0.0818100 |
| C                                                | -3.0270150 | 1.1347280  | -1.0258150 | C | -2.5776670 | 1.5073680  | -0.0407060 |
| C                                                | 2.1707430  | -0.3648060 | -0.3097510 | C | 1.9381920  | -0.3964980 | -0.4204110 |
| C                                                | 2.7387570  | -1.6537900 | -0.1844050 | C | 2.6572220  | -1.4456900 | 0.1758360  |
| C                                                | 3.7900340  | -2.0677380 | -0.9992600 | C | 3.9652090  | -1.7404210 | -0.2117570 |
| C                                                | 4.3296540  | -1.2079950 | -1.9600920 | C | 4.5885480  | -0.9893370 | -1.2090370 |
| C                                                | 3.7934060  | 0.0754830  | -2.0946470 | C | 3.8939440  | 0.0656850  | -1.8013380 |
| C                                                | 2.7311740  | 0.4868620  | -1.2933810 | C | 2.5880470  | 0.3633480  | -1.4063920 |
| C                                                | 0.2014450  | -0.8870140 | 1.2622640  | C | -0.2814480 | -1.2844920 | 0.4883720  |
| C                                                | -0.1600960 | -0.7044080 | 2.6164140  | C | -1.1050550 | -1.2987450 | 1.6204230  |
| C                                                | -0.9629080 | -1.6267130 | 3.2844770  | C | -1.8741710 | -2.4227890 | 1.9305330  |
| C                                                | -1.4257410 | -2.7709450 | 2.6305590  | C | -1.8443880 | -3.5469300 | 1.1047720  |
| C                                                | -1.0728360 | -2.9758180 | 1.2928750  | C | -1.0398550 | -3.5369490 | -0.0368080 |
| C                                                | -0.2809760 | -2.0503690 | 0.6190920  | C | -0.2640000 | -2.4177180 | -0.3392380 |
| H                                                | 0.2697230  | 0.7757170  | -2.0020420 | H | 0.0791530  | 0.6432330  | -1.9440320 |
| H                                                | 2.4632620  | 2.9475400  | 0.4682950  | H | 2.5223230  | 0.6594610  | 2.1198610  |
| H                                                | 3.1833020  | 1.4580170  | 1.1315870  | H | 1.1690180  | -0.2600550 | 2.8249220  |
| H                                                | 2.3434470  | 2.5961540  | 2.2118650  | H | 1.2807540  | 1.4847520  | 3.0995560  |
| H                                                | -1.0322090 | -1.1170160 | -2.6293130 | H | -1.8272250 | -0.6124400 | -2.5906810 |
| H                                                | -3.2141510 | -2.2669730 | -2.8921060 | H | -4.2921710 | -0.7893460 | -2.6545480 |
| H                                                | -5.2804130 | -1.2372380 | -1.9657130 | H | -5.6777250 | 0.5121370  | -1.0463470 |
| H                                                | -5.1536110 | 0.9448730  | -0.7804170 | H | -4.5671320 | 1.9939710  | 0.6151300  |
| H                                                | -2.9640730 | 2.0908040  | -0.5169670 | H | -2.1039310 | 2.1680580  | 0.6765900  |
| H                                                | 2.3556400  | -2.3319040 | 0.5705700  | H | 2.1881530  | -2.0495430 | 0.9457710  |
| H                                                | 4.2009460  | -3.0660130 | -0.8702160 | H | 4.4930840  | -2.5610940 | 0.2664880  |
| H                                                | 5.1520880  | -1.5316540 | -2.5917140 | H | 5.6041860  | -1.2206830 | -1.5179390 |
| H                                                | 4.1940440  | 0.7589200  | -2.8391260 | H | 4.3671040  | 0.6665600  | -2.5732160 |
| H                                                | 2.3165260  | 1.4803180  | -1.4365690 | H | 2.0927880  | 1.2112800  | -1.8660700 |
| H                                                | 0.2159120  | 0.1586070  | 3.1583630  | H | -1.1552510 | -0.4201150 | 2.2535480  |
| H                                                | -1.2161100 | -1.4551530 | 4.3278580  | H | -2.5004430 | -2.4140240 | 2.8185980  |
| H                                                | -2.0478010 | -3.4918980 | 3.1536220  | H | -2.4432050 | -4.4209930 | 1.3456450  |
| H                                                | -1.4282920 | -3.8572850 | 0.7649980  | H | -1.0114750 | -4.4023030 | -0.6934440 |
| H                                                | -0.0329060 | -2.2191760 | -0.4234080 | H | 0.3629380  | -2.4293480 | -1.2257330 |
| <b>TS2'</b>                                      |            |            |            |   |            |            |            |
| E = -1179.34640199, H (0K) = -1178.990849,       |            |            |            |   |            |            |            |
| H (298K) = -1178.967795, G (298K) = -1179.042788 |            |            |            |   |            |            |            |
| au                                               |            |            |            |   |            |            |            |
| Imaginary frequency = 1.                         |            |            |            |   |            |            |            |
| C                                                | -0.8901200 | 0.1810250  | 0.6535420  |   |            |            |            |
| O                                                | 0.2391200  | -2.5951700 | -0.4753160 |   |            |            |            |
| C                                                | 0.5068260  | -1.6140060 | -1.2128350 |   |            |            |            |
| C                                                | -1.5151150 | -2.1439460 | 0.5936360  |   |            |            |            |
| N                                                | -1.1495410 | -1.0653780 | 1.2758340  |   |            |            |            |
| C                                                | -0.8830290 | -1.3161060 | 2.7193790  |   |            |            |            |
| F                                                | -1.8200120 | -3.2430870 | 1.2538280  |   |            |            |            |
| F                                                | -2.2033210 | -2.0442900 | -0.5207900 |   |            |            |            |
| C                                                | 1.8429330  | -1.0359720 | -1.3411430 |   |            |            |            |
| C                                                | 2.0605970  | 0.0104250  | -2.2568680 |   |            |            |            |
| C                                                | 3.3340230  | 0.5468320  | -2.4263860 |   |            |            |            |
| C                                                | 4.4102170  | 0.0388150  | -1.6906690 |   |            |            |            |
| C                                                | 4.2060720  | -1.0079910 | -0.7844350 |   |            |            |            |

|   |            |            |            |
|---|------------|------------|------------|
| C | 2.9331760  | -1.5424850 | -0.6083490 |
| C | -1.9346930 | 0.7418030  | -0.2143900 |
| C | -3.3083930 | 0.4766760  | -0.0136030 |
| C | -4.2839450 | 1.0228630  | -0.8455720 |
| C | -3.9276610 | 1.8643040  | -1.9021930 |
| C | -2.5742450 | 2.1477380  | -2.1145420 |
| C | -1.5970670 | 1.5933500  | -1.2926130 |
| C | 0.1987560  | 0.9955770  | 1.1933250  |
| C | 1.3804600  | 0.4213590  | 1.7241680  |
| C | 2.3985910  | 1.2057050  | 2.2606220  |
| C | 2.2951170  | 2.5985650  | 2.2723480  |
| C | 1.1436530  | 3.1907880  | 1.7428900  |
| C | 0.1150970  | 2.4105230  | 1.2237280  |
| H | -0.2544150 | -1.2293780 | -1.9082800 |
| H | -1.8006940 | -1.6898230 | 3.1779700  |
| H | -0.6007960 | -0.3735690 | 3.1769110  |
| H | -0.0845400 | -2.0477520 | 2.8535610  |
| H | 1.2237800  | 0.3955370  | -2.8349220 |
| H | 3.4915790  | 1.3570850  | -3.1327540 |
| H | 5.4051740  | 0.4535370  | -1.8267870 |
| H | 5.0437840  | -1.4071730 | -0.2190160 |
| H | 2.7645620  | -2.3643170 | 0.0805730  |
| H | -3.6147870 | -0.1500370 | 0.8195350  |
| H | -5.3311210 | 0.7986730  | -0.6571180 |
| H | -4.6892490 | 2.2930900  | -2.5474920 |
| H | -2.2760850 | 2.7953990  | -2.9354600 |
| H | -0.5504300 | 1.8118100  | -1.4825940 |
| H | 1.5086560  | -0.6549330 | 1.6945670  |
| H | 3.2886960  | 0.7216290  | 2.6553300  |
| H | 3.0936130  | 3.2099170  | 2.6833450  |
| H | 1.0362350  | 4.2729470  | 1.7501700  |
| H | -0.7776380 | 2.8977030  | 0.8465750  |
